# Supplementary material for: One-pot ipso-hydroxylation and ortho-/para-halogenation of (hetero)arylboronic acids under tungsten catalysis
Source: Royal Society of Chemistry journal article supplement (doi:10.1039/d3qo01455j), 2023-12-11
Supplement: d3qo01455j1.pdf [file d3qo01455j1.pdf]

**Electronic Supplementary Information for**

**One-pot *ipso*-hydroxylation and *ortho*-/*para*-halogenation of  
(hetero)arylboronic acids under tungsten catalysis**

Zhilong Chen,<sup>a,b\*</sup> Jiao Kang<sup>a</sup>

<sup>a</sup> School of Pharmacy, Tongji Medical School, Huazhong University of Science and Technology, 13# Hangkong Road, Wuhan, China.

<sup>b</sup> Key laboratory of tropical medicinal plant chemistry of Hainan province, Hainan Normal University.

\* Corresponding author: Zhilong Chen; Email: pmchenzl@hust.edu.cn

---

## Table of Contents

|                                                                                       |           |
|---------------------------------------------------------------------------------------|-----------|
| <b>I. General information.....</b>                                                    | <b>3</b>  |
| <b>II. Starting material synthesis.....</b>                                           | <b>3</b>  |
| III. General procedure for ipso-hydroxylation-halogenation.....                       | 5         |
| <b>IV. General procedure for ipso-hydroxylation decarboxylative halogenation.....</b> | <b>6</b>  |
| <b>V. Synthetic application.....</b>                                                  | <b>7</b>  |
| <b>VI. Mechanism study.....</b>                                                       | <b>9</b>  |
| <b>VII. Condition optimization.....</b>                                               | <b>11</b> |
| <b>VIII. Analytic data of starting materials, intermediates and products.....</b>     | <b>13</b> |
| <b>IX. NMR spectra of starting materials, intermediates and products.....</b>         | <b>29</b> |
| <b>X. Reference.....</b>                                                              | <b>85</b> |

## I. General Information

Glassware and stir bars were dried in an oven at 70 °C for at least 12h and then cooled in a desiccator cabinet over Drierite prior to use. Optimization and substrate screen were performed in 20 mL vials. All other reactions were performed in round-bottom flasks sealed with rubber septa. Plastic syringes or pipets were used to transfer liquid reagents. Reactions were stirred magnetically using Teflon-coated, magnetic stir bars. Analytical thin-layer chromatography (TLC) was performed using glass plates pre-coated with 0.25 mm of 230–400 mesh silica gel impregnated with a fluorescent indicator (254 nm and 320 nm). TLC plates were visualized by exposure to ultraviolet light and/or exposure to KMnO<sub>4</sub> stain (or phosphomolybdic acid, PMA; cerium molybdate stain). Organic solutions were concentrated under reduced pressure using a rotary evaporator. Flash-column chromatography was performed on silica gel (300 or 400 mesh).

Nuclear magnetic resonance spectra were recorded at ambient temperature (unless otherwise stated) on Bruke 600 MHz spectrometers. All values for proton chemical shifts are reported in parts per million ( $\delta$ ) and referenced to the residual protium in CDCl<sub>3</sub> ( $\delta$  7.26) (or DMSO-D<sub>6</sub>,  $\delta$  2.50). All values for carbon chemical shifts are reported in parts per million ( $\delta$ ) and referenced to the carbon resonances in CDCl<sub>3</sub> ( $\delta$  77.0) (or DMSO-D<sub>6</sub>, 39.52). NMR data are represented as follows: chemical shift, multiplicity (s = singlet, d = doublet, t = triplet, q = quartet, quin = quintet, m = multiplet, br = broad), coupling constant (Hz), and integration. Infrared spectroscopic data is reported in wavenumbers (cm<sup>-1</sup>). High-resolution mass spectra (HRMS) were obtained using a liquid chromatography-electrospray ionization and Time-of-flight mass spectrometer.

All the starting materials, including (hetero)arenes halides, (hetero)aryl boronic acids/esters, diboronic esters, catalysts, bases, oxidants, metal halide, acids and solvents were commercially available. Unless noted, all the reaction solvents were not anhydrous.

## II. Starting material synthesis

II-1. boronic ester **3m**, **3n**, **3o**, **3t**, **3u** and **3w** were prepared according to Mukaiyama-borylation

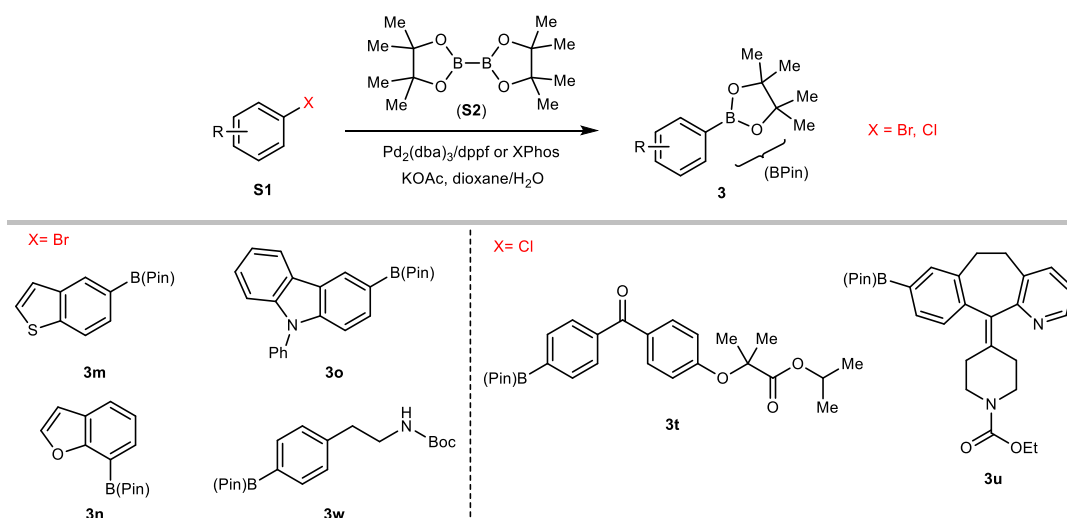

**Scheme S1.** Preparation of boronic esters **3m**, **3n**, **3o**, **3t**, **3u** and **3w**

To a round-bottom flask charged with (hetero)arylhalide **S1** (5 mmol), 4,4,4',4',5,5,5',5'-octamethyl-2,2'-bi(1,3,2-dioxaborolane) **S2** (1.905 g, 7.5 mmol, 1.5 equiv.),  $\text{Pd}_2(\text{dba})_3$  (114.5 mg, 0.125 mmol, 2.5mol %), 1,1-

bis(diphenylphosphino)ferrocene (dppf, 166.3 mg, 6 mol%, or Xphos), KOAc (980 mg, 10 mmol, 2.0 equiv.), was added dioxane/ H<sub>2</sub>O (20 mL/2.0 mL) under argon. The mixture was then vigorously stirred at around 100°C for more 12 h. After competition, EtOAc (around 100 mL) was added, and the resulting mixture was washed with H<sub>2</sub>O (30 mL), NH<sub>4</sub>Cl (aq., 30 mL), brine (30 mL) and dried by Na<sub>2</sub>SO<sub>4</sub>. The desired product **1** was isolated after filtration, concentration, and flash chromatography (Scheme S1).

**II-2.** boronic ester **3q** to **3s** were prepared in a two-step procedure.

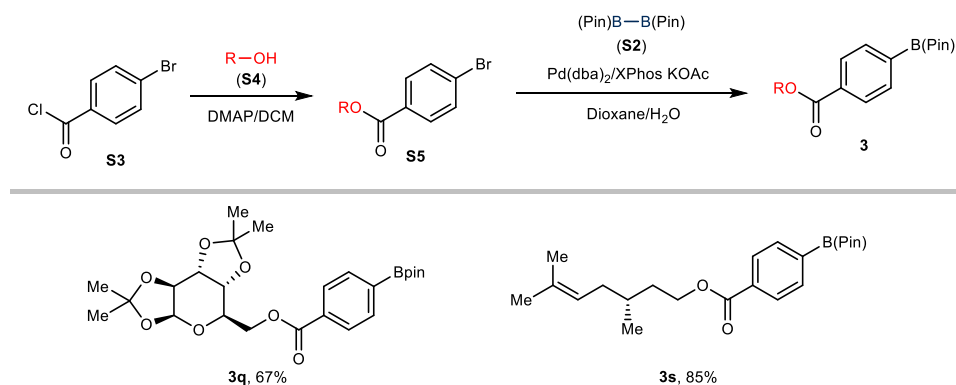

**Scheme S2.** Preparation of boronic esters **3q** and **3s**

To a round-bottom flask charged with alcohol (**S4**, 3.6 mmol, 1.2 equiv.) and DMAP (1.0998 g, 9 mmol, 3.0 equiv.) in anhydrous CH<sub>2</sub>Cl<sub>2</sub> (20 mL) was added 4-bromobenzoyl chloride (**S3**, 658.5 mg, 3 mmol). The mixture was stirred at room temperature for 2 h, and then diluted with CH<sub>2</sub>Cl<sub>2</sub>. The resulting mixture was diluted with EtOAc (150 mL), then washed with H<sub>2</sub>O (50 mL), NH<sub>4</sub>Cl (50 mL), Na<sub>2</sub>CO<sub>3</sub> (aq., 50 mL), NH<sub>4</sub>Cl (20 mL), brine (50 mL), and dried by Na<sub>2</sub>SO<sub>4</sub>. The crude product **S5** was obtained after filtration and concentration under vacuum, which was directly used in the following borylation step without further purification.

Then to the round-bottom flask charged with crude **S5**, boronic ester **S2** (1.143 g, 4.5 mmol, 1.5 equiv.), Pd(dba)<sub>2</sub> (86.3 mg, 0.15 mmol, 5 mol %), Xphos (85.8 mg, 0.18 mmol, 6 mol %), and KOAc (588 mg, 6.0 mmol, 2.0 equiv.) was added dioxane/H<sub>2</sub>O (20 mL/2 mL) under argon. The mixture was vigorously stirred at around 100°C for 11 h, and then diluted with EtOAc (around 100 mL) after cooling to room temperature. The resulting mixture washed once with H<sub>2</sub>O (30 mL), brine (30 mL), and dried by Na<sub>2</sub>SO<sub>4</sub>. After filtration and concentration under vacuum, the residue was purified by silica column (PE: EA = 10:1) to afford the desired products **3q** and **3s** (Scheme S2).

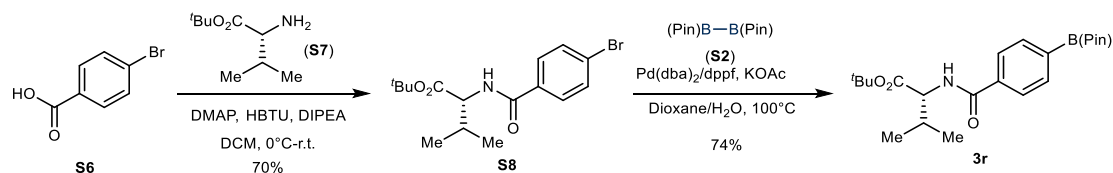

**Scheme S3.** Preparation of boronic esters **3r**

Boronic ester **3r** was prepared in a similarly fashion. To a round-bottom flask charged with 4-bromobenzoic acid **S6** (2.41 g, 12 mmol, 1.2 equiv.), DMAP (112 mg, 1.0 mmol, 10 mol%), HBTU (4.55 g, 12 mmol, 1.2 equiv.), and DIPEA (3.87 g, 30 mmol, 3.0 equiv.) was added anhydrous CH<sub>2</sub>Cl<sub>2</sub> (20 mL) under argon, followed by adding *tert*-butyl D-valinate (**S7**, 2.91 g, 10 mmol) after stirring for 10 minutes at 0°C. The reaction mixture was allowed to proceed



for 14 h from 0°C to room temperature, and diluted with EtOAc (200 mL). The resulting mixture diluted with EtOAc (150 mL), then washed with H<sub>2</sub>O (50 mL), NH<sub>4</sub>Cl (50 mL), Na<sub>2</sub>CO<sub>3</sub> (aq., 50 mL), NH<sub>4</sub>Cl (20 mL), brine (50 mL), and dried by Na<sub>2</sub>SO<sub>4</sub>. After filtration and concentration under vacuum, the crude mixture was purified by flash chromatograph (PE: EA = 40: 1) to afford the product **S8** as white solid (2.73 g, 70% yield).

Then to the round-bottom flask charged with **S8** (1.18 g, 3.0 mmol), boronic ester **S2** (1.14 g, 4.5 mmol, 1.5 equiv.), Pd(dba)<sub>2</sub> (86 mg, 0.15 mmol, 5 mol %), dppf (86 mg, 0.18 mmol, 6 mol %), and KOAc (588 mg, 6.0 mmol, 2.0 equiv.) was added dioxane/H<sub>2</sub>O (20 mL/2.0 mL) under argon. The mixture was vigorously stirred at around 100°C for 12 h, and then diluted with EtOAc (100 mL). The resulting mixture was then washed with H<sub>2</sub>O (50 mL), NH<sub>4</sub>Cl (aq., 50 mL), brine (50 mL), and dried by Na<sub>2</sub>SO<sub>4</sub>. After filtration and concentration under vacuum, the crude mixture was purified by flash chromatograph (PE: EA = 20: 1) to afford desired product **3r** (0.98 g, 2.2 mmol, 74%) as a white solid (Scheme S3).

### III. General procedure for ipso-hydroxylation-halogenation

#### III-1. General procedure for ipso-hydroxylation-tribromination

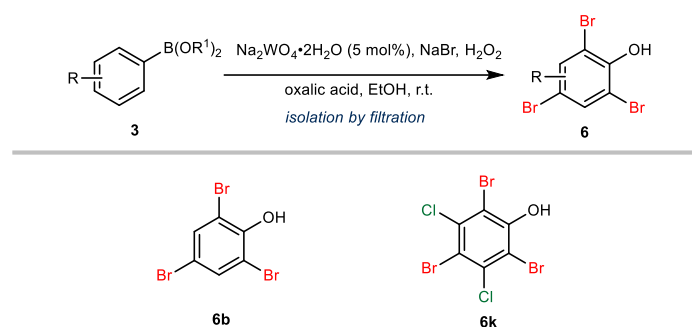

**Scheme S4.** ipso-hydroxylation-tribromination of aryl boronic acid

To a 20 mL vial charged with aryl boronic acid or ester (**3**, 1.0 mmol, 1.0 equiv.), Na<sub>2</sub>WO<sub>4</sub>•2H<sub>2</sub>O (16.5 mg, 0.05 mmol, 5 mol %), NaBr (515 mg, 5 mmol, 5.0 equivalents), oxalic acid (180 mg, 2.0 mmol, 2.0 equivalent), and H<sub>2</sub>O<sub>2</sub> (35% aq., 381  $\mu$ L, 4.4 mmol, 4.4 equivalent) was added EtOH/H<sub>2</sub>O (4.0 mL/0.3 mL). The mixture was stirred at room temperature for around 12 h, monitored by TLC analysis. Then the desired product **6** was isolated after filtration (Scheme S4).

#### III-2. General procedure for ipso-hydroxylation-dibromination

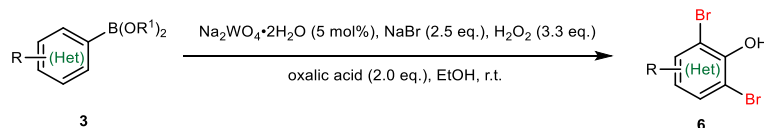

**Scheme S5.** ipso-hydroxylation-dibromination of (hetero)aryl boronic acid or ester

To a 20 mL vial charged with (hetero)aryl boronic acids or esters (**3**, 1.0 mmol, 1.0 equiv.), Na<sub>2</sub>WO<sub>4</sub>•2H<sub>2</sub>O (16.5 mg, 0.05 mmol, 5 mol %), NaBr (257.5 mg, 2.5 mmol, 2.5 equivalent), oxalic acid (180 mg, 2.0 mmol, 2.0 equivalent) in EtOH/H<sub>2</sub>O (4.0 mL/0.3 mL) was added H<sub>2</sub>O<sub>2</sub> (35% aq., 290  $\mu$ L, 3.3 mmol, 3.3 equivalent) dropwise in the open air under room temperature. The mixture was stirred at room temperature for about 12 h, followed by diluted with around 25 mL EtOAc. The resulting mixture was then washed by H<sub>2</sub>O (10 mL), brine (10 mL), and dried with Na<sub>2</sub>SO<sub>4</sub>. The desired product **6** was obtained by purification with flash chromatography after filtration and concentration

(Scheme S5).

### III-3. General procedure for selective *ipso*-hydroxylation-monobromination

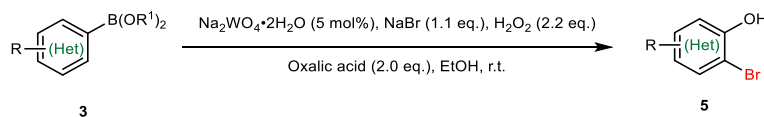

**Scheme S6.** selective *ipso*-hydroxylation-monobromination of (hetero)aryl boronic acid or ester

To a 20 mL vial charged with (hetero)aryl boronic acids or esters (**1**, 1.0 mmol, 1.0 equiv.),  $\text{Na}_2\text{WO}_4 \cdot 2\text{H}_2\text{O}$  (16.5 mg, 0.05 mmol, 5 mol %), NaBr (113.3 mg, 1.1.0 mmol, 1.1 equivalent), oxalic acid (180 mg, 2.0 mmol, 2.0 equivalent) in EtOH/ $\text{H}_2\text{O}$  (4.0 mL/0.3 mL) was added  $\text{H}_2\text{O}_2$  (35% aq., 190  $\mu\text{L}$ , 2.2 mmol, 2.2 equivalent) dropwise in the open air under room temperature. The mixture was stirred at room temperature for around 12 h, and then diluted around 25 mL EtOAc. The resulting mixture was washed by  $\text{H}_2\text{O}$  (10 mL), brine (10 mL), and dried with  $\text{Na}_2\text{SO}_4$ . The desired product **5** was obtained by purification with flash chromatography after filtration and concentration (Scheme S6).

### III-4. General procedure for selective *ipso*-hydroxylation-biodination

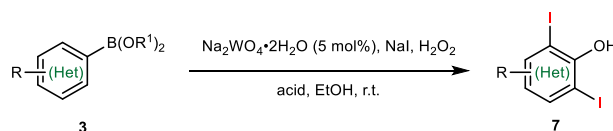

**Scheme S7.** *ipso*-hydroxylation-iodination of (hetero)aryl boronic acid or ester

To a 20 mL vial charged with (hetero)aryl boronic acids or esters (**3**, 1.0 mmol, 1.0 equiv.),  $\text{Na}_2\text{WO}_4 \cdot 2\text{H}_2\text{O}$  (16.5 mg, 0.05 mmol, 5 mol %), oxalic acid (180 mg, 2.0 mmol, 2.0 equivalent), NaI (374.5 mg, 2.5 mmol, 2.5 equivalent) in EtOH/ $\text{H}_2\text{O}$  (4.0 mL/0.3 mL) was added  $\text{H}_2\text{O}_2$  (35% aq., 290  $\mu\text{L}$ , 3.3 mmol, 3.3 equivalent) dropwise in the open air under room temperature. The mixture was stirred at room temperature for about 12 h, and then diluted with around 25 mL EtOAc. The resulting mixture was washed by  $\text{H}_2\text{O}$  (10 mL), brine (10 mL), and dried with  $\text{Na}_2\text{SO}_4$ . The desired product **7** was obtained by purification with flash chromatography after filtration and concentration (Scheme S7)

## IV. General procedure for *ipso*-hydroxylation decarboxylative halogenation

### IV-1 General procedure for *ipso*-hydroxylation decarboxylative halogenation

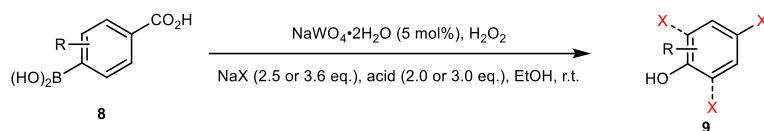

**Scheme S8.** *ipso*-hydroxylation decarboxylative halogenation

To a 20 mL vial charged with 4-boronobenzoic acid (**8**, 1.0 mmol, 1.0 equiv.),  $\text{Na}_2\text{WO}_4 \cdot 2\text{H}_2\text{O}$  (16.5 mg, 0.05 mmol, 5 mol %), oxalic acid (180 mg, 2.0 mmol, 2.0 equivalent), NaX (2.5 mmol, 2.5 equivalent) in EtOH/ $\text{H}_2\text{O}$  (4.0 mL/0.3 mL) was added  $\text{H}_2\text{O}_2$  (35% aq., 290  $\mu\text{L}$ , 3.3 mmol, 3.3 equivalent) in the open air at room temperature. The mixture was stirred at room temperature for around 12h, followed by diluting with around 25 mL EtOAc. The

resulting mixture was then washed by H<sub>2</sub>O (10 mL), brine (10 mL), and dried with Na<sub>2</sub>SO<sub>4</sub>. The desired product **9** was obtained by purification with flash chromatography after filtration and concentration (Scheme S8).

The reaction can be also performed under without tungstate catalyst, and the yields could be improved according to <sup>1</sup>H-NMR of crude products (products **9a**, **9b**, and **9c** with TMB as internal standard). To a 20 mL vial charged with 4-boronobenzoic acid (**8**, 1.0 equiv.), acid (2.0 equivalents or 3.0 equivalents), NaX (2.5 equivalents or 3.6 equivalents) in EtOH/H<sub>2</sub>O was added H<sub>2</sub>O<sub>2</sub> (35% aq., 3.5 equivalent or 4.5 equivalents) in the open air at room temperature. The mixture was stirred at room temperature for 12 or 24h, followed by diluting with around 5 mL EtOAc. The resulting mixture was then washed by H<sub>2</sub>O (2 mL), brine (2 mL), and dried with Na<sub>2</sub>SO<sub>4</sub>. The yield was determined was <sup>1</sup>H NMR of crude product with TMB as internal standard

#### IV-2 General procedure for *ipso*-hydroxylation decarboxylative bromination of (*E*)-3-(4-boronophenyl)acrylic acid

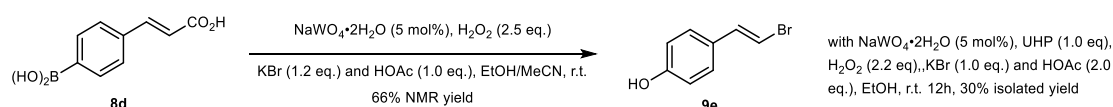

**Scheme S9.** Selective *ipso*-hydroxylation decarboxylative monobromination of (*E*)-3-(4-boronophenyl)acrylic acid

To a 20 mL vial charged with (*E*)-3-(4-boronophenyl)acrylic acid (**8d**, 39 mg, 0.2 mmol, 1.0 equivalent), Na<sub>2</sub>WO<sub>4</sub>·2H<sub>2</sub>O (3.3 mg, 0.01 mmol, 5 mol %), HOAc (12 mg, 0.2 mmol, 1.0 equivalent), KBr (28 mg, 0.24 mmol, 1.2 equivalent) in EtOH/MeCN/H<sub>2</sub>O (1.0 mL/0.5/0.3 mL) was added H<sub>2</sub>O<sub>2</sub> (35% aq., 50 uL, 0.5 mmol, 2.5 equivalents) in the open air at room temperature. The mixture was stirred at room temperature for around 12 h, followed by diluting with around 5 mL EtOAc. The resulting mixture was then washed by H<sub>2</sub>O (2 mL), brine (2 mL), and dried with Na<sub>2</sub>SO<sub>4</sub>. The yield was determined was <sup>1</sup>H NMR of crude product with TMB as internal standard (Scheme S9).

When UHP and H<sub>2</sub>O<sub>2</sub> was utilized instead of H<sub>2</sub>O<sub>2</sub>, the product was obtained in 30% yield as a white solid (22.3 mg, 0.5 mmol scale)

## V. Synthetic application

**V-1** Late-stage borylation-*ipso*-hydroxylation-halogenation of fenofibric acid and loratadine were performed as described previously. The borylation (see Scheme S1) and *ipso*-hydroxylation-halogenation (see Scheme S5, S6, S7) worked smoothly.

#### V-2 Preparation of bromoxynil (**10a**) and loxynil (**10b**)

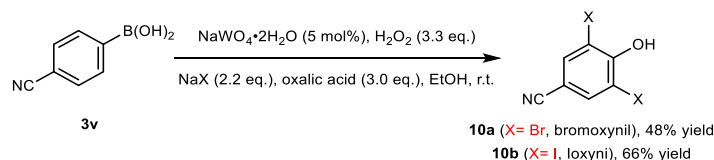

**Scheme S10.** Preparation of bromoxynil and loxynil

The bromoxynil and loxynil were prepared from (4-cyanophenyl)boronic acid (**3v**) according to procedure as described in Scheme S5 and S7 with Na<sub>2</sub>WO<sub>4</sub>·2H<sub>2</sub>O (16.5 mg, 0.05 mmol, 5 mol %), NaBr or NaI (2.5 mmol, 2.5 equivalent), oxalic acid (180 mg, 2.0 mmol, 2.0 equivalent), and H<sub>2</sub>O<sub>2</sub> (35% aq., 290 uL, 3.3 mmol, 3.3 equivalents) in EtOH/H<sub>2</sub>O (4.0 mL/0.3 mL) (Scheme S10).

#### V-2 Formal synthesis of ceratinamine

The ceratinamine can be prepared from key intermediate **12** according to reported literature.<sup>1</sup>

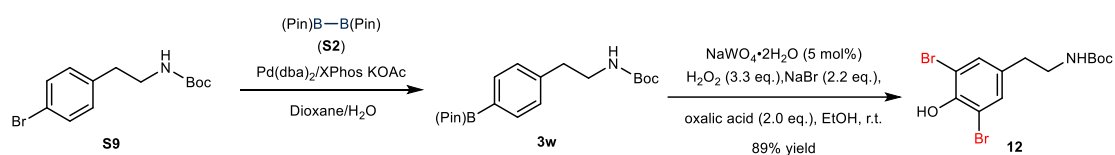

**Scheme S11.** Formal synthesis of ceratinamine

Compound **12** was prepared from *tert*-butyl (4-bromophenethyl)carbamate (**59**) according to the procedures as described in **Scheme S1** and **Scheme S5** via Miyaura-borylation (see S1) and tungstate-catalyzed *ipso*-hydroxylation-dibromination (**Scheme S11**).

### V-3 Formal synthesis of psammaplysene A

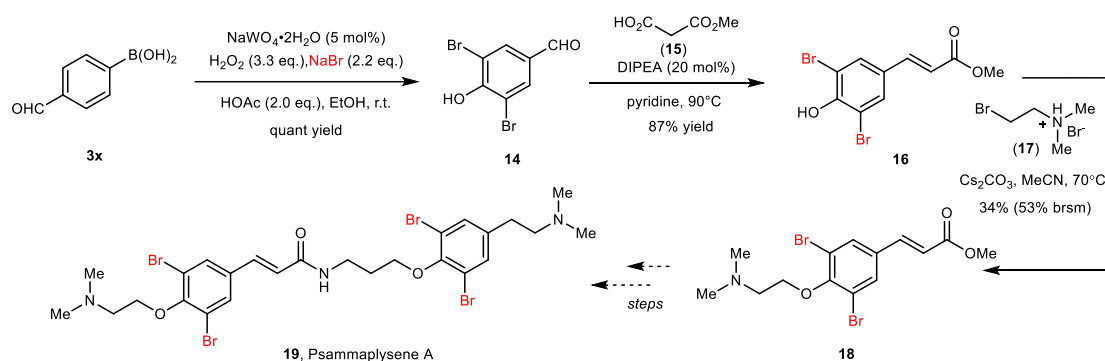

**Scheme S12.** Formal synthesis of psammaplysene A

The psammaplysene A can be prepared from key intermediate **18** according to reported literature,<sup>2</sup> which can be conveniently prepared from (4-formylphenyl) boronic acid (**3x**) in three steps.

To the round-bottom flask charged with (4-formylphenyl)boronic acid (**3x**) (696 mg, 3.0 mmol, 1.0 equivalent),  $\text{Na}_2\text{WO}_4 \cdot 2\text{H}_2\text{O}$  (49.5 mg, 0.15 mmol, 5 mol %), NaBr (773 mg, 7.5 mmol, 2.5 equivalent), acetic acid (360 mg, 6.0 mmol, 2.0 equivalent) in EtOH/ $\text{H}_2\text{O}$  (4 mL/1 mL) was added  $\text{H}_2\text{O}_2$  (35% aq., 857  $\mu\text{L}$ , 9.9 mmol, 3.3 equivalents) in the open air at room temperature. The reaction proceeded at room temperature, monitored by TLC analysis. Additional  $\text{H}_2\text{O}_2$  (35% aq., 460  $\mu\text{L}$  after 12h, 200  $\mu\text{L}$  after 20h, 200  $\mu\text{L}$  after 32h, 200  $\mu\text{L}$  after 44h) were added into the reaction before the completion of the reaction. After completion, the products decapitated as gray solid in the reaction solution, and quantitative yield of debromination product **14** (942 mg) were obtained.

The vinyl ester was introduced by condensation. To the solution of compound **14** (280 mg, 1.0 mmol, 1.0 equivalents) and 3-methoxy-3-oxopropanoic acid (**15**, 142 mg, 1.2 mmol, 1.2 equivalents) in pyridine (5 mL) was added DIPEA (26 mg, 0.2 mmol, 0.2 equivalent). The reaction mixture was then heated to 95°C for 72h, and additional 3-methoxy-3-oxopropanoic acid were added in portions (150 mg + 150 mg + 160 mg). After competition of the reaction, the reaction mixture was cooled to room temperature and 5.0 mL HOAc were added, followed by adding 30 mL  $\text{H}_2\text{O}$  and 100 mL EtOAc. The resulting mixture was then washed by  $\text{H}_2\text{O}$  (30 mL  $\times$  7) until all pyridine were removed from organic layer, and dried by  $\text{Na}_2\text{SO}_4$ . The desired product **16** was isolated as white solid (290 mg, 87% yield) after filtration, concentration and purification *via* silica gel column (PE: DCM: EtOAc = 15:1:1 to 10:1:1).

To the mixture of compound **16** (67 mg, 0.2 mmol, 1.0 equivalent), compound **17** (61 mg, 0.26 mmol, 1.3 equivalents), NaI (8 mg, 0.05 mmol, 25 mol%) and  $\text{Cs}_2\text{CO}_3$  (200mg, 0.7 mmol, 3.5 equivalents) was added anhydrous MeCN (2 mL) at room temperature under argon. Next, the reaction mixture was heated to 65°C for 24h. The undissolved solid was removed by filtration. The crude mixture was obtained after concertation and purified by

silica gel column (PE: EtOAc = 4:1 to DCM: MeOH = 10:1) to afford the desired product **18** (yellow liquid, 28 mg, 34% yield; 22 mg of starting material **16** was recycled) (Scheme S12).

## VI. Mechanism study

### VI-1. Acid effects in halogenation

The acid effects were performed with substrates **3a** (1.0 mmol scale) at around 10°C (room temperature in winter) for 12h according to the procedure as described in Scheme S5. And the reaction condition was the same (5 mol% Na<sub>2</sub>WO<sub>4</sub>•2H<sub>2</sub>O, 2.2 equivalents NaBr, 3.3 equivalents of H<sub>2</sub>O<sub>2</sub>) with different acid additives (2.0 equivalents) (entry 1-5). One control experiment was performed at 30°C (entry 6). The yield of products **4a**, **5a** and **6a** were determined by <sup>1</sup>H-NMR of crude mixture after removing all the solvents with TMB as internal standard (Table S1).

Table S1. Acid effects

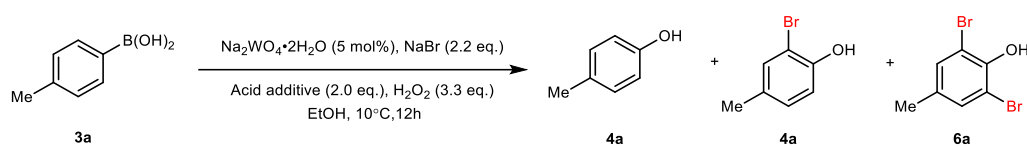

| Entry          | Acid additive                       | PKa <sup>1</sup> | Yield <sup>a</sup> |     |     |
|----------------|-------------------------------------|------------------|--------------------|-----|-----|
|                |                                     |                  | 4a                 | 4a  | 6a  |
| 1 <sup>b</sup> | HOAc                                | 4.86             | 19%                | 33% | 23% |
| 2 <sup>b</sup> | HCO <sub>2</sub> H                  | 3.77             | 4%                 | 45% | 25% |
| 3 <sup>b</sup> | Citric Acid                         | 3.09             | 0%                 | 39% | 38% |
| 4 <sup>b</sup> | ClCH <sub>2</sub> CO <sub>2</sub> H | 2.86             | 0%                 | 28% | 57% |
| 5 <sup>b</sup> | Oxalic acid                         | 2.83             | 0%                 | 27% | 68% |
| 6 <sup>c</sup> | HOAc                                | 4.86             | 0%                 | 21% | 79% |

a. Yields were determined by <sup>1</sup>H-NMR of crude mixture with 1,3,5-trimethoxybenzene (TMB) as internal standard; b. the reactions were performed at 10°C; c. the reaction were performed at 30°C.

### VI-2. Effects catalyst and acid in *ipso*-hydroxylation and halogenation

This reaction went through a two-steps cascade procedure. Thus, we would like to explore the effects and catalysts and acid additive in each step. The *ipso*-hydroxylation was performed with substrate **1a** (1.0 mmol, 1.0 equivalent) under the condition as described in Scheme S5 yet without either catalyst (Condition A) or acid additive (Condition B). Clean conversions were obtained from both conditions (Scheme S13).

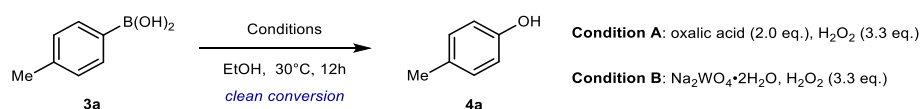

Scheme S13. Effects of acid and catalysis in *ipso*-hydroxylation

The experiments for investigation the effects of catalyst and acids in halogenation were performed with *p*-cresol (**2a**, 1.0 mmol, 1.0 equivalent) with NaBr (2.2 equivalents), acid additive (2.0 equivalents), H<sub>2</sub>O<sub>2</sub> (2.2 equivalents) in EtOH at room temperature (around 30°C) for without catalyst 12h (Entry 1-3) or with Na<sub>2</sub>WO<sub>4</sub>•2H<sub>2</sub>O (5 mol%) for 6h (entry 4-5). The ration between starting material 2a and products 5a, 6a were determined by <sup>1</sup>H-NMR of reaction crude mixture after removing all the solvents (Table S2).

**Table S2.** Effects of catalyst and acid in halogenation of phenols

| Entry | Catalyst                                                    | Acid additive                       | t/h | ratio by <sup>1</sup> H-NMR |    |    |
|-------|-------------------------------------------------------------|-------------------------------------|-----|-----------------------------|----|----|
|       |                                                             |                                     |     | 4a                          | 5a | 6a |
| 1     | --                                                          | HOAc                                | 12  | 23                          | 55 | 22 |
| 2     | --                                                          | ClCH <sub>2</sub> CO <sub>2</sub> H | 12  | 0                           | 31 | 68 |
| 3     | --                                                          | Oxalic acid                         | 12  | 0                           | 18 | 79 |
| 4     | Na <sub>2</sub> WO <sub>4</sub> ·2H <sub>2</sub> O (5 mol%) | HOAc                                | 6   | 20                          | 40 | 40 |
| 5     | Na <sub>2</sub> WO <sub>4</sub> ·2H <sub>2</sub> O (5 mol%) | Oxalic acid                         | 6   | 0                           | 21 | 79 |

**VI-3. Background reactions**

The background reactions were performed with either *p*-tolylboronic acid (**3a**) or *p*-cresol (**4a**) under the reaction as described in **Scheme S5** at 30°C for 12h (1.0 mmol scale without tungstate catalyst). The ratio of products **5a** and **6a** was determined by <sup>1</sup>H NMR of crude products (**Table S3**).

**Table S3.** Background reaction between *p*-tolylboronic acid (**3a**) or *p*-cresol (**4a**)

| Entry | FG                 | H <sub>2</sub> O <sub>2</sub> (eq.) | acid                                | Ratio by H-NMR |    |    |
|-------|--------------------|-------------------------------------|-------------------------------------|----------------|----|----|
|       |                    |                                     |                                     | 4a             | 5a | 6a |
| 1     |                    |                                     | HOAc                                | 6              | 45 | 49 |
| 2     | B(OH) <sub>2</sub> | 3.3                                 | ClCH <sub>2</sub> CO <sub>2</sub> H | 0              | 21 | 79 |
| 3     |                    |                                     | oxalic acid                         | 0              | 16 | 84 |
| 4     |                    |                                     | HOAc                                | 23             | 48 | 29 |
| 5     | OH                 | 2.2                                 | ClCH <sub>2</sub> CO <sub>2</sub> H | 0              | 30 | 70 |
| 6     |                    |                                     | oxalic acid                         | 0              | 19 | 81 |

**VI-4. Effects of boronic acids**

During the mechanism study, the *p*-tolylboronic acid (**3a**) showed higher reaction rate than *p*-cresol (**4a**) under the same reaction condition. There, we hypothesized that the boronic acid could accelerate the reaction. The *p*-cresol (**4a**) was selected a model substrate under the condition as described in **Scheme S5** without utilizing tungstate catalyst, but boronic acids (B(OH)<sub>3</sub> or **3a**, 20 mol%) were added as catalyst. The ration of starting material and products were determined by <sup>1</sup>H-NMR of crude reaction mixture after removing all the solvent (**Table S4**).

**Table S4.** Effects of boronic acid with phenol

| Entry | Catalyst                                       | Ratio by H-NMR |    |     |
|-------|------------------------------------------------|----------------|----|-----|
|       |                                                | 4a             | 5a | 6a  |
| 1     | none                                           | 0              | 15 | 85  |
| 2     | B(OH) <sub>3</sub> (20 mol%)                   | 0              | 0  | 100 |
| 3     | Tol —B(OH) <sub>2</sub> ( <b>3a</b> , 20 mol%) | 0              | 0  | 100 |

In order to figure out whether this rate-acceleration effects of boronic acids are specific to phenols, aniline **A1** was selected as another standard substrate as described in our previous research.<sup>3</sup> The reactions were performed with aniline **A2** (1.0 mmol, 1.0 equivalent), NaBr (1.2 equivalent), H<sub>2</sub>O<sub>2</sub> (3.0 equivalent) in EtOH. The ratio between starting material and product was determined by H-NMR of reaction crude mixture after removing all the solvent (Table S5).

**Table S5.** Boronic acids promoted halogenation of aniline

|  |                                                                                                                 |      |                              |     |                             |
|--|-----------------------------------------------------------------------------------------------------------------|------|------------------------------|-----|-----------------------------|
|  | acid (1.1 eq.), catalyst<br>NaBr, (1.2 eq.) H <sub>2</sub> O <sub>2</sub> (3.0 eq.)<br>EtOH (2.0 mL), 30°C, 23h |      |                              |     |                             |
|  | Entry                                                                                                           | Acid | Catalyst                     | t/h | Ratio by <sup>1</sup> H-NMR |
|  |                                                                                                                 |      |                              |     | <b>A1</b> <b>A2</b>         |
|  | 1                                                                                                               | HOAc | none                         | 23  | 24      49                  |
|  | 2                                                                                                               | HOAc | B(OH) <sub>3</sub> (20 mol%) | 23  | 13      75                  |

## VII. Condition optimization

Table S6. Condition screening for ipso-hydroxylation-bromination 1

1

2a

5a

6a

W(VI)-catalyst (5 mol%)

MBr (2.2 eq.), H<sub>2</sub>O<sub>2</sub> (3.3 eq.)

Acid additive (2.0 eq.), solvent

around 10°C, 12h

| Entry                    | W(VI)-catalyst                                                                       | MBr                                  | Acid additive                       | Solvent                       | Conversion <sup>a</sup> | Yield <sup>a</sup> |     |     |
|--------------------------|--------------------------------------------------------------------------------------|--------------------------------------|-------------------------------------|-------------------------------|-------------------------|--------------------|-----|-----|
|                          |                                                                                      |                                      |                                     |                               |                         | 2a                 | 3a  | 4a  |
| Catalyst screening       |                                                                                      |                                      |                                     |                               |                         |                    |     |     |
| 1                        | Na <sub>2</sub> WO <sub>4</sub> •2H <sub>2</sub> O                                   | NaBr                                 | HOAc                                | EtOH                          | 100%                    | 19%                | 33% | 23% |
| 2                        | K <sub>2</sub> WO <sub>4</sub>                                                       | NaBr                                 | HOAc                                | EtOH                          | 100%                    | 0                  | 9%  | 22% |
| 3                        | ZrWO <sub>4</sub>                                                                    | NaBr                                 | HOAc                                | EtOH                          | 100%                    | 0                  | 40% | 20% |
| 4                        | ZnWO <sub>4</sub>                                                                    | NaBr                                 | HOAc                                | EtOH                          | 100%                    | 0                  | 32% | 32% |
| 5                        | H <sub>4</sub> [Si(W <sub>3</sub> O <sub>10</sub> ) <sub>4</sub> ]•XH <sub>2</sub> O | NaBr                                 | HOAc                                | EtOH                          | 100%                    | 7%                 | 37% | 26% |
| 6                        | Na <sub>3</sub> O <sub>40</sub> PW <sub>12</sub> •XH <sub>2</sub> O                  | NaBr                                 | HOAc                                | EtOH                          | 100%                    | 47%                | 23% | 5%  |
| Bromide source screening |                                                                                      |                                      |                                     |                               |                         |                    |     |     |
| 7                        | Na <sub>2</sub> WO <sub>4</sub> •2H <sub>2</sub> O                                   | KBr                                  | HOAc                                | EtOH                          | 100%                    | 40%                | 43% | 7%  |
| 8                        | Na <sub>2</sub> WO <sub>4</sub> •2H <sub>2</sub> O                                   | LiBr                                 | HOAc                                | EtOH                          | 100%                    | 21%                | 33% | 12% |
| 9                        | Na <sub>2</sub> WO <sub>4</sub> •2H <sub>2</sub> O                                   | SrBr <sub>2</sub> •6H <sub>2</sub> O | HOAc                                | EtOH                          | 100%                    | 0                  | 13% | 27% |
| Solvent source screening |                                                                                      |                                      |                                     |                               |                         |                    |     |     |
| 10                       | Na <sub>2</sub> WO <sub>4</sub> •2H <sub>2</sub> O                                   | NaBr                                 | HOAc                                | <sup>i</sup> PrOH             | 100%                    | 31%                | 43% | 14% |
| 11                       | Na <sub>2</sub> WO <sub>4</sub> •2H <sub>2</sub> O                                   | NaBr                                 | HOAc                                | THF/H <sub>2</sub> O(5:1)     | 70%                     | 2%                 | 2%  | 18% |
| 12                       | Na <sub>2</sub> WO <sub>4</sub> •2H <sub>2</sub> O                                   | NaBr                                 | HOAc                                | Dioxane/H <sub>2</sub> O(5:1) | 100%                    | 13%                | 15% | 29% |
| 13                       | Na <sub>2</sub> WO <sub>4</sub> •2H <sub>2</sub> O                                   | NaBr                                 | HOAc                                | DCM/H <sub>2</sub> O(5:1)     | 100%                    | 24%                | 21% | 12% |
| 14                       | Na <sub>2</sub> WO <sub>4</sub> •2H <sub>2</sub> O                                   | NaBr                                 | HOAc                                | MeCN                          | 100%                    | 43%                | 19% | 9%  |
| Acid additive screening  |                                                                                      |                                      |                                     |                               |                         |                    |     |     |
| 15                       | Na <sub>2</sub> WO <sub>4</sub> •2H <sub>2</sub> O                                   | NaBr                                 | ClCH <sub>2</sub> CO <sub>2</sub> H | EtOH                          | 100%                    | 0                  | 28% | 57% |
| 16                       | Na <sub>2</sub> WO <sub>4</sub> •2H <sub>2</sub> O                                   | NaBr                                 | HCO <sub>2</sub> H                  | EtOH                          | 100%                    | 4%                 | 45% | 25% |
| 17                       | Na <sub>2</sub> WO <sub>4</sub> •2H <sub>2</sub> O                                   | NaBr                                 | (CO <sub>2</sub> H) <sub>2</sub>    | EtOH                          | 100%                    | 0%                 | 27% | 68% |
| 18                       | Na <sub>2</sub> WO <sub>4</sub> •2H <sub>2</sub> O                                   | NaBr                                 | Citric Acid                         | EtOH                          | 100%                    | 0%                 | 39% | 38% |

Unless noted, all the reactions were performed in 1.0 mmol scale (**1**), with 5 mol% of tungstate-catalyst, bromide salt (2.2 mmol, 2.2 equivalents), H<sub>2</sub>O<sub>2</sub> (35% aq., 3.3 mmol, 3.3 equivalents), acid additive (2.0 mmol, 2.0 equivalents) in 4.0 mL solvents at room temperature. The condition optimization was carried out during the winter, the room temperature was around 10°C.

<sup>a</sup>. Conversion and yields were determined by <sup>1</sup>H-NMR of crude products with TMB as internal standard.



**Table S7. Condition screening for ipso-hydroxylation-bromination 2**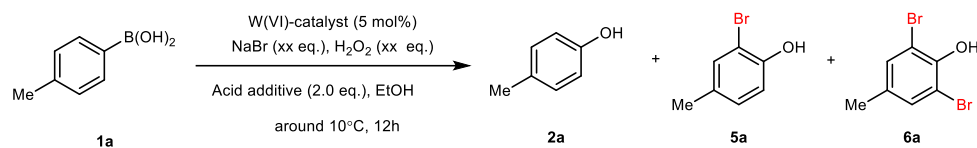

| Entry                                            | W(VI)-catalyst                                                                       | NaBr (eq.) | Acid additive                       | H <sub>2</sub> O <sub>2</sub> (eq.) | Yield <sup>a</sup> |     |     |
|--------------------------------------------------|--------------------------------------------------------------------------------------|------------|-------------------------------------|-------------------------------------|--------------------|-----|-----|
|                                                  |                                                                                      |            |                                     |                                     | 2a                 | 5a  | 6a  |
| Catalyst confirmation                            |                                                                                      |            |                                     |                                     |                    |     |     |
| 1                                                | Na <sub>2</sub> WO <sub>4</sub> ·2H <sub>2</sub> O                                   | 2.2        | ClCH <sub>2</sub> CO <sub>2</sub> H | 3.3                                 | 0%                 | 17% | 63% |
| 2                                                | H <sub>4</sub> [Si(W <sub>3</sub> O <sub>10</sub> ) <sub>4</sub> ]•XH <sub>2</sub> O | 2.2        | ClCH <sub>2</sub> CO <sub>2</sub> H | 3.3                                 | 0%                 | 8%  | 58% |
| 3                                                | Na <sub>2</sub> WO <sub>4</sub> ·2H <sub>2</sub> O                                   | 2.2        | (CO <sub>2</sub> H) <sub>2</sub>    | 3.3                                 | 0%                 | 21% | 68% |
| 4                                                | H <sub>4</sub> [Si(W <sub>3</sub> O <sub>10</sub> ) <sub>4</sub> ]•XH <sub>2</sub> O | 2.2        | (CO <sub>2</sub> H) <sub>2</sub>    | 3.3                                 | 0%                 | 16% | 51% |
| 5                                                | Na <sub>2</sub> WO <sub>4</sub> ·2H <sub>2</sub> O                                   | 2.2        | (CO <sub>2</sub> H) <sub>2</sub>    | 3.3                                 | 0%                 | 17% | 59% |
| Effects of H <sub>2</sub> O <sub>2</sub> loading |                                                                                      |            |                                     |                                     |                    |     |     |
| 6                                                | Na <sub>2</sub> WO <sub>4</sub> ·2H <sub>2</sub> O                                   | 2.2        | ClCH <sub>2</sub> CO <sub>2</sub> H | 3.3                                 | 0%                 | 25% | 59% |
| 7                                                | Na <sub>2</sub> WO <sub>4</sub> ·2H <sub>2</sub> O                                   | 2.2        | (CO <sub>2</sub> H) <sub>2</sub>    | 3.3                                 | 0%                 | 27% | 66% |
| 8                                                | Na <sub>2</sub> WO <sub>4</sub> ·2H <sub>2</sub> O                                   | 2.2        | (CO <sub>2</sub> H) <sub>2</sub>    | 4.0                                 | 0%                 | 22% | 68% |
| 9                                                | Na <sub>2</sub> WO <sub>4</sub> ·2H <sub>2</sub> O                                   | 2.2        | (CO <sub>2</sub> H) <sub>2</sub>    | 5.0                                 | 0%                 | 27% | 79% |
| Effects of NaBr loading                          |                                                                                      |            |                                     |                                     |                    |     |     |
| 10                                               | Na <sub>2</sub> WO <sub>4</sub> ·2H <sub>2</sub> O                                   | 3.3        | (CO <sub>2</sub> H) <sub>2</sub>    | 4.0                                 | 0%                 | 0%  | 73% |
| 11                                               | Na <sub>2</sub> WO <sub>4</sub> ·2H <sub>2</sub> O                                   | 3.3        | (CO <sub>2</sub> H) <sub>2</sub>    | 5.0                                 | 0%                 | 0%  | 77% |
| 12                                               | Na <sub>2</sub> WO <sub>4</sub> ·2H <sub>2</sub> O                                   | 2.5        | (CO <sub>2</sub> H) <sub>2</sub>    | 3.3                                 | 0%                 | 0%  | 98% |
| 13                                               | Na <sub>2</sub> WO <sub>4</sub> ·2H <sub>2</sub> O                                   | 2.5        | (CO <sub>2</sub> H) <sub>2</sub>    | 2.2+1.1 <sup>b</sup>                | 0%                 | 0%  | 97% |

Unless noted, all the reactions were performed in 1.0 mmol scale (**1**), with 5 mol% of tungstate-catalyst, bromide salt, H<sub>2</sub>O<sub>2</sub> (35% aq.), acid additive (2.0 mmol, 2.0 equivalents) in 4.0 mL solvents at room temperature. The condition optimization was carried out during the winter, the room temperature was around 10°C.

<sup>a</sup>. 100% conversion, and yields were determined by <sup>1</sup>H-NMR of crude products with TMB as internal standard.

<sup>b</sup>. The H<sub>2</sub>O<sub>2</sub> was added in two portions. 2.2 equivalents of H<sub>2</sub>O<sub>2</sub> were added initially, followed by adding another 1.1 equivalent after 12h. And the reaction continued stirring for another 12h.

# VIII. Analytic data of starting materials, intermediates and products

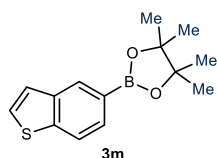

**2-(benzo[b]thiophen-5-yl)-4,4,5,5-tetramethyl-1,3,2-dioxaborolane (3m)**<sup>4</sup> was prepared according to procedure II-1 as described in **Scheme S1**, purified by flash column chromatography (PE: EtOAc = 30: 1), and obtained as a white solid (0.88g, 68% yield, 5.0 mmol scale).

**<sup>1</sup>H NMR** (600 MHz, Chloroform-*d*) δ 8.32 (s, 1H), 7.89 (d, *J* = 8.0 Hz, 1H), 7.76 (d, *J* = 8.1 Hz, 1H), 7.42 (dd, *J* = 5.5, 1.5 Hz, 1H), 7.35 (dd, *J* = 5.4, 1.5 Hz, 1H), 1.38 (s, 12H)

**<sup>13</sup>C NMR** (151 MHz, Chloroform-*d*) δ 142.7, 139.2, 130.7, 129.7, 126.0, 124.1, 121.8, 83.8, 24.9

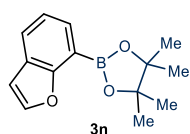

**2-(benzofuran-7-yl)-4,4,5,5-tetramethyl-1,3,2-dioxaborolane (3n)**<sup>5</sup> was prepared according to procedure II-1 as described in **Scheme S1**, purified by flash column chromatography (PE: EtOAc = 50: 1), and obtained as a white solid (0.49g, 34% yield, 5.0 mmol scale).

**<sup>1</sup>H NMR** (600 MHz, Chloroform-*d*) δ 7.75 (dd, *J* = 7.2, 1.4 Hz, 1H), 7.73 (d, *J* = 2.2 Hz, 1H), 7.71 (dd, *J* = 7.7, 1.4 Hz, 1H), 7.25 (t, *J* = 7.4 Hz, 1H), 6.76 (d, *J* = 2.2 Hz, 1H), 1.41 (s, 12H).

**<sup>13</sup>C NMR** (151 MHz, Chloroform-*d*) δ 158.9, 145.3, 131.7, 126.8, 124.5, 122.3, 106.1, 83.9, 24.9

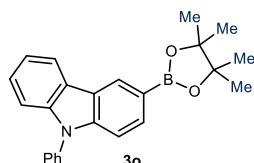

**9-phenyl-3-(4,4,5,5-tetramethyl-1,3,2-dioxaborolan-2-yl)-9H-carbazole (3o)**<sup>6</sup> was prepared according to procedure II-1 as described in **Scheme S1**, purified by flash column chromatography (PE: EtOAc = 10: 1), and obtained as a white solid (0.45g, 61% yield, 2.0 mmol scale)

**<sup>1</sup>H NMR** (600 MHz, Chloroform-*d*) δ 8.66 (s, 1H), 8.19 (d, *J* = 7.5 Hz, 1H), 7.87 (d, *J* = 8.2 Hz, 1H), 7.62 (t, *J* = 7.4 Hz, 2H), 7.56 (d, *J* = 7.3 Hz, 2H), 7.49 (d, *J* = 7.0 Hz, 1H), 7.39 (d, *J* = 12.3 Hz, 3H), 7.30 (t, *J* = 6.4 Hz, 1H), 1.41 (s, 12H)

**<sup>13</sup>C NMR** (151 MHz, Chloroform-*d*) δ 143.0, 141.0, 137.5, 132.4, 129.9, 127.7, 127.6, 127.1, 125.9, 123.5, 123.1, 120.5, 120.3, 119.5, 109.7, 109.1, 83.6, 24.9

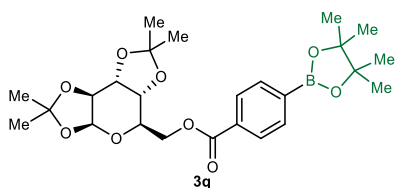

**((4a*S*,5*R*,5a*R*,8a*R*,8b*S*)-2,2,7,7-tetramethyltetrahydro-5H-bis([1,3]dioxolo)[4,5-*b*:4',5'-*d*]pyran-5-yl)methyl 4-(4,4,5,5-tetramethyl-1,3,2-dioxaborolan-2-yl)benzoate (3q)**<sup>7</sup> was prepared according to procedure II-2 as described in **Scheme S2**,

purified by flash column chromatography (PE: EtOAc = 10: 1), and obtained as white solid (0.96 g, 67% yield, 3.0 mmol scale).

**<sup>1</sup>H NMR** (600 MHz, Chloroform-*d*)  $\delta$  8.04 – 8.01 (m, 2H), 7.87 – 7.84 (m, 2H), 5.56 (d, *J* = 4.9 Hz, 1H), 4.65 (dd, *J* = 7.9, 2.5 Hz, 1H), 4.54 (dd, *J* = 11.5, 4.8 Hz, 1H), 4.43 (dd, *J* = 11.5, 7.5 Hz, 1H), 4.37 – 4.31 (m, 2H), 4.18 (ddd, *J* = 7.1, 4.8, 1.8 Hz, 1H), 1.50 (s, 3H), 1.47 (s, 3H), 1.35 (s, 15H), 1.33 (s, 3H)

**<sup>13</sup>C NMR** (151 MHz, Chloroform-*d*)  $\delta$  166.5, 134.6, 132.2, 128.7, 109.7, 108.8, 96.3, 84.1, 71.1, 70.7, 70.5, 66.1, 63.9, 25.98, 25.95, 25.0, 24.9, 24.5

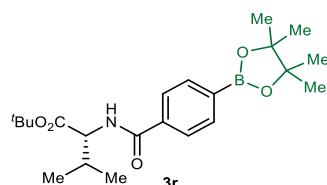

**Tert-butyl (4-(4,4,5,5-tetramethyl-1,3,2-dioxaborolan-2-yl)benzoyl)-D-valinate (3r)<sup>8</sup>** was prepared according to procedure II-3 as described in **Scheme S3**, purified by flash column chromatography (PE : EtOAc = 20 : 1), and obtained as white solid (0.98g, 74% yield, 3.0 mmol scale).

**<sup>1</sup>H NMR** (600 MHz, Chloroform-*d*)  $\delta$  7.88 – 7.85 (m, 2H), 7.80 – 7.77 (m, 2H), 6.69 (d, *J* = 8.5 Hz, 1H), 4.68 (dd, *J* = 8.5, 4.4 Hz, 1H), 2.27 (heptd, *J* = 6.9, 4.4 Hz, 1H), 1.49 (s, 9H), 1.35 (s, 12H), 0.99 (dd, *J* = 11.7, 6.9 Hz, 6H)

**<sup>13</sup>C NMR** (151 MHz, Chloroform-*d*)  $\delta$  171.3, 167.1, 136.6, 134.9, 132.5, 126.1, 84.1, 82.2, 57.6, 31.8, 28.0, 24.84, 24.82, 18.9, 17.8

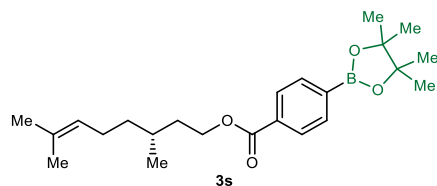

**(R)-3,6-dimethylhept-5-en-1-yl 4-(4,4,5,5-tetramethyl-1,3,2-dioxaborolan-2-yl)benzoate (3s)** was prepared according to procedure II-2 as described in **Scheme S2**, purified by flash column chromatography (PE: EtOAc = 10: 1), and obtained as a colorless liquid (0.98g, 85% yield, 3.0 mmol scale)

**<sup>1</sup>H NMR** (600 MHz, Chloroform-*d*)  $\delta$  8.03–8.00 (m, 2H), 7.87 (d, *J* = 7.9 Hz, 2H), 5.10 (tt, *J* = 7.2, 1.5 Hz, 1H), 4.41 – 4.32 (m, 2H), 2.01 (dtt, *J* = 21.9, 14.7, 7.0 Hz, 2H), 1.82 (dtd, *J* = 12.6, 7.2, 5.1 Hz, 1H), 1.71–1.63 (m, 1H), 1.67 (d, *J* = 1.7 Hz, 3H), 1.61–1.57 (m, 1H), 1.60 (s, 3H), 1.44 – 1.39 (m, 1H), 1.35 (s, 12H), 1.24 (dddd, *J* = 13.5, 9.3, 7.6, 6.0 Hz, 1H), 0.97 (d, *J* = 6.6 Hz, 3H)

**<sup>13</sup>C NMR** (151 MHz, Chloroform-*d*)  $\delta$  166.7, 134.6, 133.8, 132.7, 131.3, 128.5, 124.5, 84.1, 63.6, 37.0, 35.5, 29.5, 25.7, 25.4, 24.8, 19.5, 17.6

**HRMS** for C<sub>23</sub>H<sub>35</sub>BNaO<sub>4</sub><sup>+</sup> ([M+Na<sup>+</sup>]): 409.2521; found 409.2517

**IR** (KBr, cm<sup>-1</sup>): 2928, 1724, 1401, 1360, 1269, 1113, 858

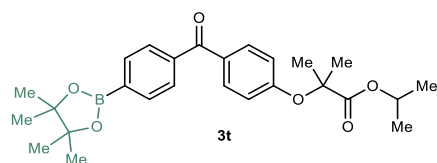

**Isopropyl 2-methyl-2-(4-(4-(4,4,5,5-tetramethyl-1,3,2-dioxaborolan-2-yl)benzoyl)phenoxy)propanoate (3t)<sup>9</sup>** was prepared according to procedure II-1 as described in **Scheme S1**, purified by flash column chromatography (PE:

EtOAc = 30: 1), and obtained as a gray solid (2.44g, 95% yield, 5.0 mmol scale).

**<sup>1</sup>H NMR** (600 MHz, Chloroform-*d*)  $\delta$  7.92 – 7.88 (m, 2H), 7.76 – 7.73 (m, 2H), 7.72 – 7.69 (m, 2H), 6.87 – 6.83 (m, 2H), 5.08 (hept, *J* = 6.3 Hz, 1H), 1.36 (s, 6H), 1.26 (d, *J* = 5.1 Hz, 12H), 1.20 (d, *J* = 6.3 Hz, 6H)

**<sup>13</sup>C NMR** (151 MHz, Chloroform-*d*)  $\delta$  195.7, 173.2, 159.6, 140.4, 134.5, 132.8, 132.1, 130.5, 128.7, 117.1, 84.2, 79.4, 69.3, 25.4, 24.9, 21.5

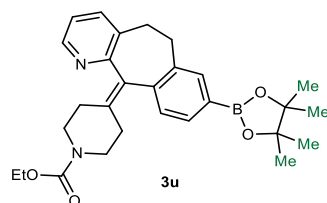

**Ethyl 4-(8-(4,4,5,5-tetramethyl-1,3,2-dioxaborolan-2-yl)-5,6-dihydro-11H-benzo[5,6]cyclohepta[1,2-b]pyridin-11-ylidene)piperidine-1-carboxylate (3u)**<sup>10</sup> was prepared according to procedure II-1 as described in **Scheme S1**, purified by flash column chromatography (DCM: MeOH = 200: 1- 50:1), and obtained as a yellow solid (0.88g, 38% yield, 5.0 mmol scale).

**<sup>1</sup>H NMR** (600 MHz, Chloroform-*d*)  $\delta$  8.37 (dd, *J* = 4.8, 1.6 Hz, 1H), 7.65–7.58 (m, 2H), 7.41 (dd, *J* = 7.8, 1.7 Hz, 1H), 7.20 (d, *J* = 7.5 Hz, 1H), 7.06 (dd, *J* = 7.7, 4.8 Hz, 1H), 4.12 (q, *J* = 7.1 Hz, 2H), 3.79 (d, *J* = 27.9 Hz, 2H), 3.42 (tt, *J* = 11.9, 4.5 Hz, 1H), 3.34 (dt, *J* = 14.0, 5.5 Hz, 1H), 3.13 (dtd, *J* = 12.9, 8.9, 4.0 Hz, 2H), 2.88 – 2.81 (m, 2H), 2.48 (ddd, *J* = 14.2, 9.5, 4.5 Hz, 1H), 2.33 (tddd, *J* = 17.4, 12.9, 8.8, 4.5 Hz, 3H), 1.31 (d, *J* = 2.2 Hz, 12H), 1.24 (d, *J* = 6.9 Hz, 3H).

**<sup>13</sup>C NMR** (151 MHz, Chloroform-*d*)  $\delta$  155.5, 146.3, 142.8, 137.6, 136.9, 136.9, 135.3, 135.1, 133.7, 132.5, 128.6, 122.1, 83.7, 61.3, 44.8, 31.8, 31.5, 24.8, 24.7, 14.6

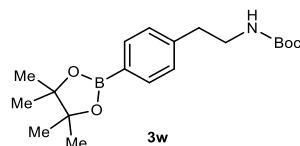

**Tert-butyl (4-(4,4,5,5-tetramethyl-1,3,2-dioxaborolan-2-yl)phenethyl)carbamate (3w)**<sup>11</sup> was prepared according to II-1 procedure as described in **Scheme S1**, purified by flash column chromatography (PE: EtOAc = 50: 1), and obtained as white solid (0.88g, 84% yield, 3.0 mmol scale).

**<sup>1</sup>H NMR** (600 MHz, Chloroform-*d*)  $\delta$  7.68 (dd, *J* = 7.9, 2.4 Hz, 2H), 7.13 (d, *J* = 7.4 Hz, 2H), 4.43 (s, 1H), 3.30 (t, *J* = 7.0 Hz, 2H), 2.73 (d, *J* = 7.4 Hz, 2H), 1.36 (s, 9H), 1.27 (d, *J* = 2.5 Hz, 12H).

**<sup>13</sup>C NMR** (151 MHz, Chloroform-*d*)  $\delta$  155.8, 142.3, 135.1, 128.2, 126.8, 83.7, 79.2, 41.6, 36.3, 28.4, 24.8

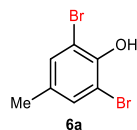

**2,6-dibromo-4-methylphenol (6a)**<sup>12</sup> was prepared according to procedure III-2 procedure as described in **Scheme S5**, purified by flash column chromatography (PE: EtOAc = 10: 1), and obtained as a yellow liquid (238 mg, 90% yield, 1.0 mmol scale).

**<sup>1</sup>H NMR** (600 MHz, Chloroform-*d*)  $\delta$  7.26 (s, 2H), 5.70 (s, 1H), 2.25 (s, 3H)

**<sup>13</sup>C NMR** (151 MHz, Chloroform-*d*)  $\delta$  147.1, 132.4, 109.4, 20.0

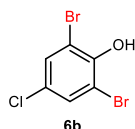

**2,6-dibromo-4-chlorophenol (6b)**<sup>10</sup> was prepared according to procedure **III-2** as described in **Scheme S5**, obtained as pale-yellow solid (272 mg, 96% yield, 1.0 mmol scale).

<sup>1</sup>H NMR (600 MHz, Chloroform-*d*)  $\delta$  7.46 (s, 2H), 5.85 (s, 1H)

<sup>13</sup>C NMR (151 MHz, DMSO-*D*<sub>6</sub> + Chloroform-*d*)  $\delta$  149.7, 130.9, 124.5, 111.6

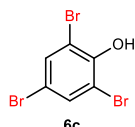

**2,4,6-tribromophenol (6c)**<sup>13</sup> was prepared according to procedure **III-1** as described in **Scheme S4** utilizing HOAc as acid additive, obtained as white solid (3.9g, quantitative yield, 10.0 mmol scale) by simple filtration.

The *ipso*-hydroxylation *decarboxylative bromination* of 4-boronobenzoic acid (**8a**) was performed according to procedure **IV-1** as described in Scheme S8, affording product **6c** as pale-yellow solid (137.9 mg, 42% yield, 1.0 mmol scale), or 71% yield (2.34g, 10.0 mmol scale, isolated by simple filtration).

<sup>1</sup>H NMR (600 MHz, Chloroform-*d*)  $\delta$  7.59 (s, 2H), 5.88 (s, 1H)

<sup>13</sup>C NMR (151 MHz, Chloroform-*d*)  $\delta$  149.0, 134.2, 112.7, 110.4

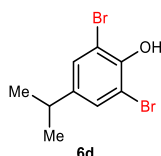

**2,6-dibromo-4-isopropylphenol (6d)**<sup>14</sup> prepared according to procedure **III-2** as described in **Scheme S5**, and obtained as a yellow liquid (286 mg, 97% yield, 1.0 mmol scale).

<sup>1</sup>H NMR (600 MHz, Chloroform-*d*)  $\delta$  7.29 (s, 2H), 5.72 (s, 1H), 2.81 (hept, *J* = 6.8 Hz, 1H), 1.21 (d, *J* = 6.8 Hz, 6H)

<sup>13</sup>C NMR (151 MHz, Chloroform-*d*)  $\delta$  147.2, 143.5, 130.0, 109.6, 33.1, 23.9

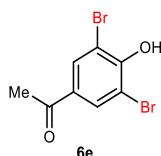

**1-(3,5-dibromo-4-hydroxyphenyl)ethan-1-one (6e)**<sup>15</sup> was prepared according to procedure **III-2** as described in **Scheme S5**, purified by flash column chromatography (PE: EtOAc = 4: 1), and obtained as yellow solid (200 mg, 68% yield, 1.0 mmol scale).

<sup>1</sup>H NMR (600 MHz, Chloroform-*d*)  $\delta$  8.07 (s, 2H), 6.32 (s, 1H), 2.55 (s, 3H)

<sup>13</sup>C NMR (151 MHz, Chloroform-*d*)  $\delta$  194.3, 153.3, 132.6, 131.9, 110.1, 26.2

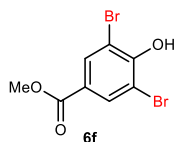

**Methyl 3,5-dibromo-4-hydroxybenzoate (6f)**<sup>3</sup> was prepared according to procedure **III-2** as described in **Scheme S5**, purified by flash column chromatography (PE: EtOAc = 10: 1), and obtained as white solid (226 mg, 73% yield, 1.0 mmol scale).

**<sup>1</sup>H NMR** (600 MHz, Chloroform-*d*) δ 8.15 (s, 2H), 6.29 (s, 1H), 3.90 (s, 3H)

**<sup>13</sup>C NMR** (151 MHz, Chloroform-*d*) δ 164.5, 153.3, 133.6, 124.7, 109.7, 52.5

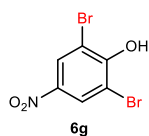

**2,6-dibromo-4-nitrophenol (6g)**<sup>10</sup> was prepared according to procedure **III-2** as described in **Scheme S5**, purified by flash column chromatography (PE: EtOAc = 10: 1), and obtained as yellow solid (176 mg, 60% yield, 1.0 mmol scale)

**<sup>1</sup>H NMR** (600 MHz, Chloroform-*d*) δ 8.41 (s, 2H), 6.50 (s, 1H)

**<sup>13</sup>C NMR** (151 MHz, Chloroform-*d*) δ 155.0, 141.6, 127.9, 109.7

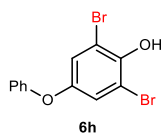

**2,6-dibromo-4-phenoxyphenol (6h)**<sup>16</sup> was prepared according to procedure **III-2** as described in **Scheme S5**, purified by flash column chromatography (PE: EtOAc = 40: 1), and obtained as a yellow solid (122 mg, 34% yield, 1.0 mmol scale, along with monobromination product (38% yield, 101 mg))

**<sup>1</sup>H NMR** (600 MHz, Chloroform-*d*) δ 7.35 (dd, *J* = 8.6, 7.2 Hz, 2H), 7.13 (t, *J* = 7.4 Hz, 1H), 7.16 (s, 2H), 6.97 (dd, *J* = 8.4, 1.3 Hz, 2H), 5.70 (s, 1H)

**<sup>13</sup>C NMR** (151 MHz, Chloroform-*d*) δ 157.0, 150.7, 145.8, 129.9, 123.7, 122.8, 118.4, 109.7

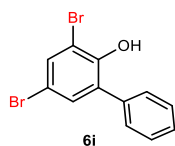

**3,5-dibromo-[1,1'-biphenyl]-2-ol (6i)**<sup>17</sup> was prepared according to procedure **III-2** as described in **Scheme S5**, purified by flash column chromatography (PE: EtOAc = 40: 1), obtained as brown solid (269 mg, 82% yield, 1.0 mmol scale)

**<sup>1</sup>H NMR** (600 MHz, Chloroform-*d*) δ 7.61 (d, *J* = 4.5 Hz, 1H), 7.47 (dq, *J* = 13.3, 7.1 Hz, 4H), 7.40 (q, *J* = 5.9, 5.0 Hz, 2H), 5.66 (s, 1H).

**<sup>13</sup>C NMR** (151 MHz, Chloroform-*d*) δ 148.6, 135.9, 133.3, 132.7, 131.0, 129.0, 128.7, 128.3, 112.7, 111.5

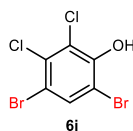

**4,6-dibromo-2,3-dichlorophenol (6j)** was prepared according to procedure **III-2** as described in **Scheme S5**, purified by flash column chromatography (PE: EtOAc = 40: 1), and obtained as a yellow solid (158 mg, 50% yield, 1.0 mmol scale).

**<sup>1</sup>H NMR** (600 MHz, Chloroform-*d*)  $\delta$  7.72 (s, 1H), 6.01 (s, 1H).

**<sup>13</sup>C NMR** (151 MHz, Chloroform-*d*)  $\delta$  149.3, 134.1, 133.2, 121.0, 113.9, 108.5

**HRMS** for C<sub>6</sub>HBr<sub>2</sub>Cl<sub>2</sub>O<sup>+</sup> ([M-H]<sup>+</sup>): 318.7756; found 318.7761

**IR** (KBr, cm<sup>-1</sup>): 3420, 1628, 1438, 1363, 1164, 798

**M.p.**: 82-87°C

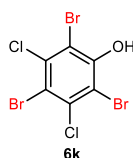

**2,4,6-tribromo-3,5-dichlorophenol (6k)** was prepared according to **III-1** as described in **Scheme S4**, obtained as a white solid by filtration (232 mg, 59% yield, 1.0 mmol scale)

**<sup>1</sup>H NMR** (600 MHz, Chloroform-*d*)  $\delta$  6.24 (s, 1H)

**<sup>13</sup>C NMR** (151 MHz, Chloroform-*d* + DMSO-*D*<sub>6</sub>)  $\delta$  152.1, 134.6, 113.4, 111.2

**HRMS** for [M-H]<sup>+</sup> C<sub>6</sub>Br<sub>3</sub>Cl<sub>2</sub>O<sup>+</sup>; 398.6861; found 396.6860

**IR** (KBr, cm<sup>-1</sup>): 3415, 1631, 1361, 1281, 1262, 971

**M.p.**: 160-171.2°C

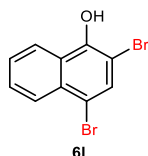

**2,4-dibromonaphthalen-1-ol (6l)**<sup>15</sup> was prepared according to procedure **III-2** as described in **Scheme S5**, purified by flash column chromatography (PE: EtOAc = 30: 1), and obtained as a white solid (162 mg, 54% yield, 1.0 mmol scale).

**<sup>1</sup>H NMR** (600 MHz, Chloroform-*d*)  $\delta$  8.25 (ddd, *J* = 8.4, 1.3, 0.7 Hz, 1H), 8.16 – 8.11 (m, 1H), 7.79 (s, 1H), 7.63 (ddd, *J* = 8.4, 6.8, 1.3 Hz, 1H), 7.56 (ddd, *J* = 8.2, 6.9, 1.2 Hz, 1H), 5.97 (s, 1H)

**<sup>13</sup>C NMR** (151 MHz, Chloroform-*d*)  $\delta$  148.2, 131.9, 131.1, 128.1, 127.1, 126.9, 125.1, 122.8, 113.3, 103.2

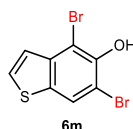

**4,6-dibromobenzo[b]thiophen-5-ol (6m)** was prepared according to procedure **III-2** as described in **Scheme S5**, purified by flash column chromatography (PE: EtOAc = 30: 1), and obtained as a yellow solid (127 mg, 82% yield, 0.5 mmol scale).

**<sup>1</sup>H NMR** (600 MHz, Chloroform-*d*)  $\delta$  7.95 (s, 1H), 7.52 (d, *J* = 5.5 Hz, 1H), 7.34 (d, *J* = 5.5 Hz, 1H), 5.92 (s, 1H).

**$^{13}\text{C}$  NMR** (151 MHz, Chloroform-*d*)  $\delta$  146.4, 139.8, 132.7, 129.2, 124.8, 123.7, 107.8, 103.1

**HRMS** for  $[\text{M}-\text{H}]^-$   $\text{C}_8\text{H}_5\text{Br}_2\text{OS}$ , 306.8256; found 306.8255

**IR** (KBr,  $\text{cm}^{-1}$ ): 3463, 1632, 1406, 1342, 1179, 750

**M.p.:** 87-88°C

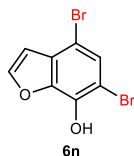

**4,6-dibromobenzofuran-7-ol (6n)** was prepared according to procedure **III-2** as described in **Scheme S5**, purified by flash column chromatography (PE: EtOAc = 40: 1), obtained as a yellow solid (116 mg, 79% yield, 0.5 mmol scale).

**$^1\text{H}$  NMR** (600 MHz, Chloroform-*d*)  $\delta$  7.65 (d,  $J$  = 3.9 Hz, 1H), 7.51 – 7.46 (m, 1H), 6.77 (d,  $J$  = 3.9 Hz, 1H), 5.75 (s, 1H).

**$^{13}\text{C}$  NMR** (151 MHz, Chloroform-*d*)  $\delta$  146.1, 142.6, 138.3, 130.3, 128.2, 107.5, 105.0, 104.4

**HRMS** for  $[\text{M}-\text{H}]^-$   $\text{C}_8\text{H}_3\text{Br}_2\text{O}_2^-$ , 2980.8485; found 290.8501

**IR** (KBr,  $\text{cm}^{-1}$ ): 3383, 1634, 1579, 1333, 1280 1174, 852

**M.p.:** 89-95°C

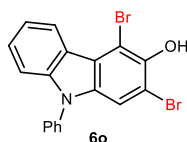

**2,4-dibromo-9-phenyl-9H-carbazol-3-ol (6o)** was prepared according to procedure **III-2** as described in **Scheme S5**, purified by flash column chromatography (PE: EtOAc = 50: 1), obtained as white solid (72 mg, 57% yield, 0.3 mmol scale).

**$^1\text{H}$  NMR** (600 MHz, Chloroform-*d*)  $\delta$  8.22 (d,  $J$  = 2.4 Hz, 2H), 7.67 – 7.60 (m, 2H), 7.52 (dt,  $J$  = 7.1, 3.0 Hz, 5H), 7.27 (dd,  $J$  = 9.7, 3.8 Hz, 2H)

**$^{13}\text{C}$  NMR** (151 MHz, Chloroform-*d*)  $\delta$  139.9, 136.8, 130.1, 129.5, 128.1, 126.9, 123.9, 123.2, 113.0, 111.5 (6 carbons were buried in other peaks)

**HRMS** for  $\text{C}_{18}\text{H}_{11}\text{Br}_2\text{NNaO}^+ ([\text{M}+\text{Na}]^+)$ : 439.9079; found 439.9140

**IR** (KBr,  $\text{cm}^{-1}$ ): 3413, 1595, 1471, 1437, 1277, 1231, 758

**M.p.:** 140-143°C

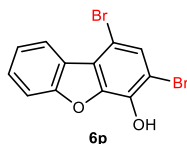

**1,3-dibromodibenzo[b,d]furan-4-ol (6p)** was prepared according to procedure **III-2** as described in **Scheme S5**, purified by flash column chromatography (PE: EtOAc = 30: 1), and obtained as a yellow solid (115 mg, 67% yield, 0.5 mmol scale).

**$^1\text{H}$  NMR** (600 MHz, Chloroform-*d*)  $\delta$  8.45 (dt,  $J$  = 7.9, 1.0 Hz, 1H), 7.62 (dt,  $J$  = 8.4, 0.9 Hz, 1H), 7.59 (s, 1H), 7.54 (ddd,  $J$  = 8.4, 7.2, 1.3 Hz, 1H), 7.42 (ddd,  $J$  = 8.1, 7.3, 1.0 Hz, 1H), 5.83 (s, 1H)

**$^{13}\text{C}$  NMR** (151 MHz, Chloroform-*d*)  $\delta$  156.3, 144.1, 138.3, 128.8, 128.3, 125.1, 123.7, 123.3, 122.5, 111.9, 107.6, 106.0

**HRMS** for  $\text{C}_{12}\text{H}_5\text{Br}_2\text{O}_2^-$   $[\text{M}-\text{H}]^-$   $\text{C}_{12}\text{H}_6\text{Br}_2\text{NaO}_2^+$ : 340.8641; found 340.8647



IR (KBr,  $\text{cm}^{-1}$ ): 3078, 1701, 1596, 1446, 1251, 1199, 839, 748

M.p.: 135-151°C

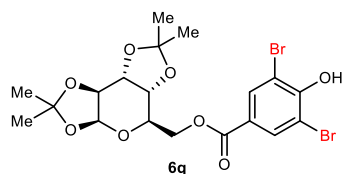

**((3*aS*,5*R*,5*aR*,8*aR*,8*bS*)-2,2,7,7-tetramethyltetrahydro-5H-bis([1,3]dioxolo)[4,5-b:4',5'-d]pyran-5-yl)methyl 3,5-dibromo-4-hydroxybenzoate (6q)** was prepared according procedure III-2 as described in **Scheme S5**, purified by flash column chromatography (PE: EtOAc = 4: 1), obtained as white solid (119.2 mg, 76% yield, 0.3 mmol scale).

**$^1\text{H}$  NMR** (600 MHz, Chloroform-*d*)  $\delta$  8.15 (s, 2H), 6.29 (s, 1H), 5.56 (d,  $J$  = 4.9 Hz, 1H), 4.66 (dd,  $J$  = 7.9, 2.5 Hz, 1H), 4.51 (dd,  $J$  = 11.5, 4.6 Hz, 1H), 4.41 (dd,  $J$  = 11.5, 7.6 Hz, 1H), 4.35 (dd,  $J$  = 5.0, 2.5 Hz, 1H), 4.31 (dd,  $J$  = 7.9, 1.9 Hz, 1H), 4.17 (ddd,  $J$  = 6.9, 4.6, 1.7 Hz, 1H), 1.52 (s, 3H), 1.48 (s, 3H), 1.36 (s, 3H), 1.34 (s, 3H)

**$^{13}\text{C}$  NMR** (151 MHz, Chloroform-*d*)  $\delta$  163.8, 153.3, 133.7, 124.6, 109.8, 109.7, 108.9, 96.3, 71.1, 70.7, 70.5, 66.0, 64.4, 26.00, 25.96, 24.9, 24.5

**HRMS** for  $\text{C}_{19}\text{H}_{22}\text{Br}_2\text{NaO}_8^+$  ( $[\text{M}+\text{Na}^+]$ ): 558.9553; found 558.9552

IR (KBr,  $\text{cm}^{-1}$ ): 3420, 1628, 1438, 1363, 1164, 798, 690

M.p.: 138-147°C

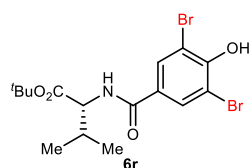

***Tert*-butyl (3,5-dibromo-4-hydroxybenzoyl)-D-valinate (6r)** was prepared according to procedure III-2 as described in **Scheme S5**, and obtained as white solid (115 mg, 79% yield, 0.3 mmol scale)

**$^1\text{H}$  NMR** (600 MHz, Chloroform-*d*)  $\delta$  7.92 (s, 2H), 6.55 (d,  $J$  = 8.4 Hz, 1H), 6.26 (s, 1H), 4.63 (dd,  $J$  = 8.4, 4.4 Hz, 1H), 2.27 (td,  $J$  = 7.0, 4.4 Hz, 1H), 1.50 (s, 9H), 0.99 (d,  $J$  = 7.0 Hz, 6H)

**$^{13}\text{C}$  NMR** (151 MHz, Chloroform-*d*)  $\delta$  171.4, 164.2, 152.2, 131.1, 128.7, 110.0, 82.6, 57.9, 31.7, 28.1, 18.9, 17.8

**HRMS** for  $[\text{M}+\text{Na}^+]$   $\text{C}_{16}\text{H}_{21}\text{Br}_2\text{NNaO}_4^+$ , 473.9709; found 473.9713

IR (KBr,  $\text{cm}^{-1}$ ): 3332, 2921, 1708, 1652, 1545, 1370, 1135, 732

M.p.: 130-141°C

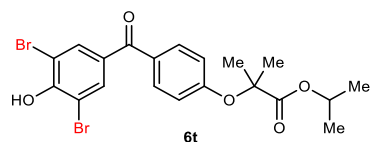

**Isopropyl 2-(4-(3,5-dibromo-4-hydroxybenzoyl)phenoxy)-2-methylpropanoate (6t)** was prepared according to procedure III-2 as described in **Scheme S5**, purified by flash column chromatography (PE: EtOAc = 4: 1), and obtained as white solid (108 mg, 72% yield, 0.3 mmol scale).

**$^1\text{H}$  NMR** (600 MHz, Chloroform-*d*)  $\delta$  7.90 (s, 2H), 7.70 (d,  $J$  = 8.8 Hz, 2H), 6.88 (d,  $J$  = 8.8 Hz, 2H), 6.29 (s, 1H), 5.09 (p,  $J$  = 6.3 Hz, 1H), 1.67 (s, 6H), 1.21 (d,  $J$  = 6.3 Hz, 6H)

**$^{13}\text{C}$  NMR** (151 MHz, Chloroform-*d*)  $\delta$  191.6, 173.1, 159.8, 152.6, 133.9, 132.6, 131.8, 129.7, 117.3, 109.8, 79.4, 69.4, 25.4, 21.5

**HRMS** for  $C_{20}H_{20}Br_2NaO_5^+ ([M+Na]^+)$ : 522.9549; found 522.9534

**IR** (KBr,  $cm^{-1}$ ): 3383, 1731, 1646, 1597, 1251, 1153, 1097, 767

**M.p.**: 149-152°C

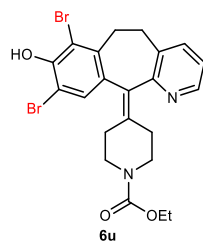

**Ethyl 4-(7,9-dibromo-8-hydroxy-5,6-dihydro-11H-benzo[5,6]cyclohepta[1,2-b]pyridin-11-ylidene)piperidine-1-carboxylate (6u)** was prepared according to procedure **III-2** as described in **Scheme S5**, purified by flash column chromatography (DCM: MeOH = 20: 1), obtained as yellow solid (65 mg, 42% yield, 0.3 mmol scale).

**$^1H$  NMR** (600 MHz, Chloroform-*d*)  $\delta$  8.41 (dd,  $J$  = 4.8, 1.4 Hz, 1H), 7.48 (d,  $J$  = 6.7 Hz, 1H), 7.34 (s, 1H), 7.13 (dd,  $J$  = 7.7, 4.8 Hz, 1H), 6.26 (s, 1H), 4.14 (q,  $J$  = 7.1 Hz, 2H), 3.82 (s, 2H), 3.32 (dddd,  $J$  = 18.4, 15.8, 8.8, 4.3 Hz, 2H), 3.16 (dddd,  $J$  = 26.8, 13.2, 9.2, 4.1 Hz, 2H), 3.05 (ddd,  $J$  = 15.8, 9.2, 4.5 Hz, 1H), 2.92 – 2.84 (m, 1H), 2.49 (ddd,  $J$  = 14.2, 9.5, 4.7 Hz, 1H), 2.39 (tq,  $J$  = 9.1, 4.8 Hz, 2H), 2.28 (dt,  $J$  = 14.1, 4.8 Hz, 1H), 1.25 (t,  $J$  = 7.1 Hz, 3H)

**$^{13}C$  NMR** (151 MHz, Chloroform-*d*)  $\delta$  157.1, 155.5, 148.8, 146.6, 138.1, 137.5, 137.2, 133.2, 133.1, 132.9, 131.9, 122.5, 113.1, 107.0, 61.4, 44.6, 32.8, 30.4, 14.7

**HRMS** for  $C_{22}H_{22}Br_2N_2NaO_3^+ ([M+Na]^+)$ : 544.9869; found 544.9884

**IR** (KBr,  $cm^{-1}$ ): 3420, 2907, 1698, 1522, 1440, 1223, 1115, 783

**M.p.**: 189-210°C

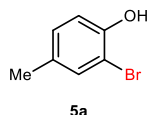

**2-bromo-4-methylphenol (5a)**<sup>18</sup> was prepared according to procedure **III-3** as described in **Scheme S6**, purified by flash column chromatography (PE: EtOAc = 30: 1), and obtained as colorless liquid (155 mg, 83% yield, 1.0 mmol scale).

**$^1H$  NMR** (600 MHz, Chloroform-*d*)  $\delta$  7.27 (d,  $J$  = 2.4 Hz, 1H), 7.01 (dd,  $J$  = 8.4, 2.3 Hz, 1H), 6.91 (dd,  $J$  = 8.4, 1.9 Hz, 1H), 5.36 (d,  $J$  = 2.0 Hz, 1H), 2.26 (d,  $J$  = 2.0 Hz, 3H).

**$^{13}C$  NMR** (151 MHz, Chloroform-*d*)  $\delta$  150.0, 132.1, 131.4, 129.7, 115.7, 109.8, 20.2

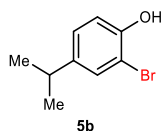

**2-bromo-4-isopropylphenol (5b)**<sup>19</sup> was prepared according to procedure **III-3** as described in **Scheme S6**, purified by flash column chromatography (PE: EtOAc = 50: 1), and obtained as colorless liquid (175 mg, 82% yield, 1.0 mmol scale).

**$^1H$  NMR** (600 MHz, Chloroform-*d*)  $\delta$  7.31 (d,  $J$  = 2.1 Hz, 1H), 7.07 (dd,  $J$  = 8.4, 2.1 Hz, 1H), 6.94 (d,  $J$  = 8.3 Hz, 1H), 5.36 (s, 1H), 2.83 (hept,  $J$  = 6.9 Hz, 1H), 1.21 (d,  $J$  = 6.9 Hz, 6H)

**$^{13}C$  NMR** (151 MHz, Chloroform-*d*)  $\delta$  150.1, 142.7, 129.6, 127.2, 115.8, 109.9, 33.2, 24.0

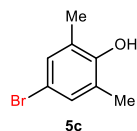

**4-bromo-2,6-dimethylphenol (5c)**<sup>10</sup> was prepared according to procedure **III-3** as described in **Scheme S6**, obtained as a gray solid (214 mg, quantitative yield, 1.0 mmol scale)

**<sup>1</sup>H NMR** (600 MHz, Chloroform-*d*)  $\delta$  7.03 (s, 2H), 4.5 (br, 1H), 2.14 (s, 6H)

**<sup>13</sup>C NMR** (151 MHz, Chloroform-*d*)  $\delta$  151.3, 131.0, 125.2, 112.0, 15.7

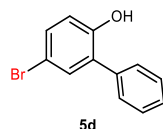

**5-bromo-[1,1'-biphenyl]-2-ol (5d)**<sup>20</sup> was prepared according to procedure **III-3** as described in **Scheme S6**, purified by flash column chromatography (PE: EtOAc = 30: 1), and obtained as purple liquid (149 mg, 60% yield, 1.0 mmol scale).

**<sup>1</sup>H NMR** (600 MHz, Chloroform-*d*)  $\delta$  9.55 – 9.50 (m, 2H), 9.48 – 9.43 (m, 3H), 9.41 – 9.36 (m, 2H), 8.90 (d, *J* = 8.5 Hz, 1H), 7.26 (s, 1H).

**<sup>13</sup>C NMR** (151 MHz, Chloroform-*d*)  $\delta$  151.6, 135.7, 132.6, 131.8, 130.0, 129.4, 128.9, 128.4, 117.6, 112.7

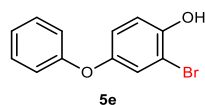

**2-bromo-4-phenoxyphenol (5e)** was prepared according to procedure **III-3** as described in **Scheme S6**, purified by flash column chromatography (PE: EtOAc = 20: 1), obtained as yellow liquid (118 mg, 75% yield, 0.6 mmol scale).

**<sup>1</sup>H NMR** (600 MHz, Chloroform-*d*)  $\delta$  7.32 (m, 2H), 7.17 (d, *J* = 2.8 Hz, 1H), 7.09 (m, 1H), 7.00 (d, *J* = 8.9 Hz, 1H), 6.95 (m, 3H), 5.37 (s, 1H)

**<sup>13</sup>C NMR** (151 MHz, Chloroform-*d*)  $\delta$  157.7, 150.5, 148.6, 129.8, 123.1, 122.9, 120.5, 118.0, 116.5, 110.0

**HRMS** for C<sub>12</sub>H<sub>8</sub>BrO<sub>2</sub><sup>-</sup> ([M-H]<sup>-</sup>): 262.9713; found 262.9691

**IR** (KBr, cm<sup>-1</sup>): 2923, 1591, 1486, 1212, 903, 689

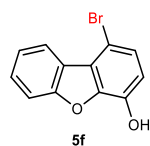

**1-bromodibenzo[b,d]furan-4-ol (5f)**<sup>21</sup> was prepared according to procedure **III-3** as described in **Scheme S6**, purified by flash column chromatography (PE : EtOAc = 30 : 1), obtained as white solid (52 mg, 40% yield, 0.5 mmol scale)

**<sup>1</sup>H NMR** (600 MHz, Chloroform-*d*)  $\delta$  8.50 (d, *J* = 7.7 Hz, 1H), 7.59 (d, *J* = 8.3 Hz, 1H), 7.53 (t, *J* = 8.2 Hz, 1H), 7.42 (dd, *J* = 7.6, 2.4 Hz, 1H), 7.35 (dd, *J* = 8.6, 2.5 Hz, 1H), 6.92 (dd, *J* = 8.6, 2.5 Hz, 1H), 5.52 (s, 1H)

**<sup>13</sup>C NMR** (151 MHz, Chloroform-*d*)  $\delta$  156.0, 144.5, 140.5, 127.9, 127.0, 124.8, 124.2, 123.0, 122.6, 114.6, 111.6, 106.0

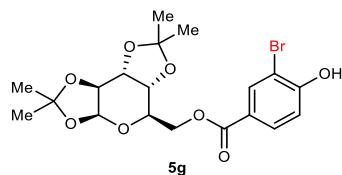

**((3a*S*,5*R*,5a*R*,8a*R*,8b*S*)-2,2,7,7-tetramethyltetrahydro-5*H*-bis([1,3]dioxolo)[4,5-*b*:4',5'-*d*]pyran-5-yl)methyl 3-bromo-4-hydroxybenzoate (5g)** was prepared according to procedure **III-3** as described in **Scheme S6**, purified by flash column chromatography (PE: EtOAc = 20: 1), and obtained as colorless liquid (57 mg, 43% yield, 0.3 mmol scale).

**<sup>1</sup>H NMR** (600 MHz, Chloroform-*d*) δ 8.19 (s, 1H), 7.92 (d, *J* = 8.6 Hz, 1H), 7.04 (d, *J* = 8.6 Hz, 1H), 6.01 (s, 1H), 5.56 (d, *J* = 5.0 Hz, 1H), 4.65 (d, *J* = 8.0 Hz, 1H), 4.51 (dd, *J* = 11.6, 4.8 Hz, 1H), 4.40 (dd, *J* = 11.6, 7.6 Hz, 1H), 4.35 (d, *J* = 4.6 Hz, 1H), 4.31 (d, *J* = 8.0 Hz, 1H), 4.17 (dd, *J* = 7.4, 4.7 Hz, 1H), 1.52 (s, 3H), 1.48 (s, 3H), 1.36 (s, 3H), 1.33 (s, 3H)

**<sup>13</sup>C NMR** (151 MHz, Chloroform-*d*) δ 165.0, 156.4, 134.1, 131.1, 123.8, 115.8, 110.0, 109.7, 108.9, 96.3, 71.1, 70.7, 70.5, 66.1, 64.0, 26.0, 25.9, 24.9, 24.5

**HRMS** for [M+Na<sup>+</sup>] C<sub>19</sub>H<sub>23</sub>BrNaO<sub>8</sub><sup>+</sup>, 483.0448; found 483.0441

**IR** (KBr, cm<sup>-1</sup>): 2990, 1720, 1599, 1209, 1068, 762

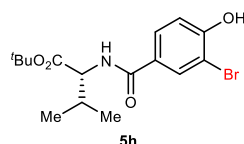

**Tert-butyl (3-bromo-4-hydroxybenzoyl)-D-valinate (5h)** was prepared according to procedure **III-3** as described in **Scheme S6**, purified by flash column chromatography (PE: EtOAc = 20: 1), and obtained as white solid (89 mg, 64% yield, 0.3 mmol scale).

**<sup>1</sup>H NMR** (600 MHz, Chloroform-*d*) δ 7.97 (s, 1H), 7.66 (d, *J* = 8.5 Hz, 1H), 7.04 (d, *J* = 8.5 Hz, 1H), 6.59 (d, *J* = 8.4 Hz, 1H), 6.37 (s, 1H), 4.64 (dd, *J* = 8.4, 4.4 Hz, 1H), 2.26 (heptd, *J* = 6.9, 4.4 Hz, 1H), 1.49 (s, 9H), 0.99 (d, *J* = 9.5 Hz, 3H), 0.98 (d, *J* = 9.5 Hz, 3H)

**<sup>13</sup>C NMR** (151 MHz, Chloroform-*d*) δ 171.4, 165.5, 155.4, 131.6, 128.0, 127.9, 115.9, 110.4, 82.5, 57.8, 31.8, 28.1, 18.9, 17.8

**HRMS** for [M+Na<sup>+</sup>] C<sub>16</sub>H<sub>22</sub>BrNNaO<sub>4</sub><sup>+</sup>, 394.0624; found 395.0624

**IR** (KBr, cm<sup>-1</sup>): 3386, 2975, 1709, 1633, 1508, 1371, 1303, 1154, 1147, 840

**M.p.**: 113-116°C

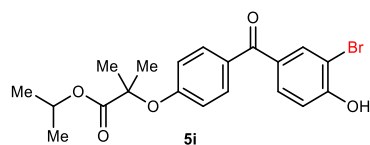

**Isopropyl 2-(4-(3-bromo-4-hydroxybenzoyl)phenoxy)-2-methylpropanoate (5i)** was prepared procedure **III-3** as described in **Scheme S6**, purified by flash column chromatography (PE: EtOAc = 20: 1), and obtained as white solid (45.7 mg, 36% yield, 0.3 mmol scale).

**<sup>1</sup>H NMR** (600 MHz, Chloroform-*d*) δ 7.96 (s, 1H), 7.73 – 7.68 (m, 2H), 7.67 (d, *J* = 8.4 Hz, 1H), 7.07 (d, *J* = 8.4 Hz, 1H), 6.86 (d, *J* = 8.8 Hz, 2H), 6.25 (s, 1H), 5.13 – 5.05 (m, 1H), 1.66 (s, 6H), 1.20 (d, *J* = 6.1 Hz, 6H)

**<sup>13</sup>C NMR** (151 MHz, Chloroform-*d*) δ 193.1, 173.2, 159.5, 155.8, 134.4, 131.9, 131.8, 131.5, 130.4, 117.3, 115.6, 110.2, 79.4, 69.4, 25.4, 21.5

**HRMS** for  $[M+Na]^+$   $C_{20}H_{21}BrNaO_5^+$ , 443.0465; found 443.0463

**IR** (KBr,  $cm^{-1}$ ): 3451, 1634, 1597, 1274, 1254, 1143, 765

**M.p.:** 109-122°C

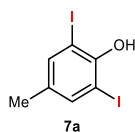

**2,6-diiodo-4-methylphenol (7a)**<sup>18</sup> was prepared according to procedure **III-4** as described in **Scheme S7**, purified by flash column chromatography (PE: EtOAc = 30: 1), obtained as yellow solid (163.8 mg, 46% yield, 1.0 mmol scale). 35% yield (125 mg, 1.0 mmol) was obtained when  $ClCH_2CO_2H$  was used instead of oxalic acid; and 33% yield (112 mg, 1.0 mmol) was obtained when HOAc was used instead of oxalic acid with UHP (1.0 equivalent) and  $H_2O_2$  (3.3 equivalents)

**$^1H$  NMR** (600MHz, Chloroform-*d*)  $\delta$  7.49 (s, 2H), 5.57 (s, 1H), 2.22 (s, 3H)

**$^{13}C$  NMR** (151 MHz, Chloroform-*d*)  $\delta$  151.4, 139.6, 133.9, 81.9, 19.4

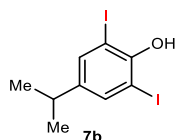

**2,6-diiodo-4-isopropylphenol (7b)**<sup>22</sup> was prepared according to procedure **III-4** as described in **Scheme S7** utilizing HOAc/UHP instead of oxalic acid/ $H_2O_2$  respectively, purified by flash column chromatography (PE: EtOAc = 50: 1), and obtained as yellow solid (152 mg, 40% yield, 1.0 mmol scale).

**$^1H$  NMR** (600MHz, Chloroform-*d*)  $\delta$  7.51 (s, 2H), 5.59 (s, 1H), 2.77 (hept,  $J$  = 6.9 Hz, 1H), 1.19 (d,  $J$  = 6.9 Hz, 6H)

**$^{13}C$  NMR** (151 MHz, Chloroform-*d*)  $\delta$  151.5, 145.0, 137.3, 82.2, 32.7, 23.9

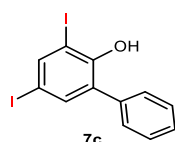

**3,5-diiodo-[1,1'-biphenyl]-2-ol (7c)**<sup>18</sup> was prepared according to **III-4** as described in **Scheme S7**, purified by flash column chromatography (PE: EtOAc = 30: 1), and obtained as white solid (86 mg, 21% yield, 1.0 mmol scale).

When the reaction was preformed with [1,1'-biphenyl]-2-ylboronic acid (40 mg, 0.2 mmol, 1.0 eq.), HOAc (24 mg, 2.0 eq.), KI (88 mg, 2.5 eq.),  $H_2O_2$  (35% aq., 68  $\mu$ L, 3.5 eq.) in EtOH/ $H_2O$  (1.0 mL/0.5 mL) for 24h,  $^1H$ -NMR of crude product showed 28% of **7c** and 42% yield of 5-iodo-[1,1'-biphenyl]-2-ol (mon-iodination) with TMB as internal standard.

**$^1H$  NMR** (600MHz, Chloroform-*d*)  $\delta$  7.96 (s, 1H), 7.53 (s, 1H), 7.49 – 7.43 (m, 4H), 7.43 – 7.39 (m, 1H), 5.58 (s, 1H).

**$^{13}C$  NMR** (151 MHz, Chloroform-*d*)  $\delta$  151.7, 145.0, 139.3, 135.8, 130.6, 129.0, 128.9, 128.5, 86.8, 83.1

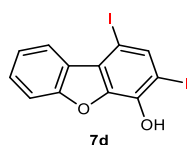

**1,3-diiododibenzo[b,d]furan-4-ol (7d)** was prepared according to **III-4** as described in **Scheme S7** utilizing

ClCH<sub>2</sub>COOH instead of oxalic acid, and obtained as gray solid (163 mg, 75% yield, 0.5 mmol scale)

**<sup>1</sup>H NMR** (600 MHz, DMSO-*d*<sub>6</sub>) δ 11.19 (s, 1H), 8.62 – 8.57 (m, 1H), 8.03 (d, *J* = 2.3 Hz, 1H), 7.77 (dd, *J* = 8.4, 2.2 Hz, 1H), 7.67 – 7.62 (m, 1H), 7.52 (td, *J* = 7.6, 2.1 Hz, 1H).

**<sup>13</sup>C NMR** (151 MHz, DMSO-*d*<sub>6</sub>) δ 155.2, 144.0, 143.0, 140.9, 128.7, 126.9, 124.3, 122.8, 120.9, 111.9, 85.5, 74.8

**HRMS** for C<sub>12</sub>H<sub>5</sub>I<sub>2</sub>O<sub>2</sub><sup>-</sup> ([M-H]<sup>-</sup>): 434.8384; found 434.8416

**IR** (KBr, cm<sup>-1</sup>): 3414, 1626, 1587, 1445, 1237, 1191, 748

**M.p.**: 157-172°C

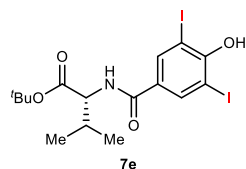

**Tert-butyl (4-hydroxy-3,5-diiodobenzoyl)-D-valinate (7e)** was prepared according to **III-4** as described in **Scheme S7** utilizing ClCH<sub>2</sub>COOH instead of oxalic acid, purified by flash column chromatography (PE: EtOAc = 50: 1), and obtained as white solid (70 mg, 41% yield, 0.3 mmol scale).

24% yield (41 mg, 0.3 mmol scale) was obtained with UHP (1.0 equivalent), H<sub>2</sub>O<sub>2</sub> (3.3 equivalents) and HOAc (2.0 equivalents)

**<sup>1</sup>H NMR** (600 MHz, Chloroform-*d*) δ 8.12 (s, 2H), 6.53 (d, *J* = 8.4 Hz, 1H), 6.11 (s, 1H), 4.62 (dd, *J* = 8.6, 4.5 Hz, 1H), 2.30 – 2.22 (m, 1H), 0.99 (d, *J* = 6.8, 3H), 0.98 (d, *J* = 6.8, 3H)

**<sup>13</sup>C NMR** (151 MHz, Chloroform-*d*) δ 171.5, 163.9, 156.4, 138.4, 130.3, 82.7, 82.2, 58.0, 31.9, 28.2, 19.01, 18.0

**HRMS** for C<sub>16</sub>H<sub>21</sub>I<sub>2</sub>NNaO<sub>4</sub><sup>+</sup> ([M+Na]<sup>+</sup>): 567.9452; found 567.9462

**IR** (KBr, cm<sup>-1</sup>): 3281, 2970, 1725, 1617, 1563, 1286, 1164, 844, 659

**M.p.**: 143-154°C

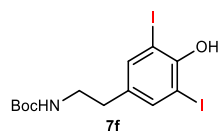

**Tert-butyl (4-hydroxy-3,5-diiodophenethyl)carbamate (7f)**<sup>23</sup> was prepared according to **III-4** as described in **Scheme S7** utilizing HOAc instead of oxalic acid, UHP (1.0 equivalent) and H<sub>2</sub>O<sub>2</sub> (35% aq., 3.3 equivalents), purified by flash column chromatography (PE : EtOAc = 10 : 1), and obtained as white solid (90 mg, 46% yield, 0.4 mmol scale).

**<sup>1</sup>H NMR** (600 MHz, Chloroform-*d*) δ 7.50 (s, 2H), 5.69 (s, 1H), 4.55 (s, 1H), 3.29 (t, *J* = 7.2 Hz, 2H), 2.66 (t, *J* = 7.2 Hz, 2H), 1.44 (s, 9H)

**<sup>13</sup>C NMR** (151 MHz, Chloroform-*d*) δ 155.8, 152.2, 139.4, 135.1, 82.3, 79.5, 41.6, 34.2, 28.4

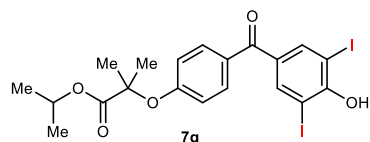

**Isopropyl 2-(4-(4-hydroxy-3,5-diiodobenzoyl)phenoxy)-2-methylpropanoate (7g)** was prepared according to **III-4** as described in **Scheme S7** with HOAc (2.0 equivalents), UHP (1.0 equivalent) and H<sub>2</sub>O<sub>2</sub> (3.3 equivalents) purified by flash column chromatography (PE : EtOAc = 10 : 1), and obtained as white solid (145 mg, 81% yield, 0.3 mmol scale).

45% yield (79 mg, 0.3 mmol) was obtained with  $\text{ClCH}_2\text{CO}_2\text{H}$  (2.0 equivalent).

$^1\text{H NMR}$  (600 MHz, Chloroform-*d*)  $\delta$  8.10 (s, 2H), 7.71 – 7.67 (m, 2H), 6.89 – 6.86 (m, 2H), 6.16 (s, 1H), 1.67 (s, 6H), 1.21 (s, 3H), 1.20 (s, 3H)

$^{13}\text{C NMR}$  (151 MHz, Chloroform-*d*)  $\delta$  191.3, 173.1, 159.8, 156.6, 141.1, 134.1, 131.8, 129.8, 117.2, 81.8, 79.4, 69.4, 25.4, 21.5

HRMS for  $\text{C}_{20}\text{H}_{20}\text{I}_2\text{NaO}_5^+$  ( $[\text{M}+\text{Na}]^+$ ): 616.9292; found 616.9284

IR (KBr,  $\text{cm}^{-1}$ ): 3401, 1731, 1644, 1597, 1253, 1149, 1101, 736

M.p.: 143-154°C

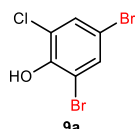

**2,4-dibromo-6-chlorophenol (9a)**<sup>24</sup> was prepared according to procedure **IV-1** as described in **Scheme S8**, purified by flash column chromatography (PE: EtOAc = 2: 1), and obtained as white solid (90 mg, 28% yield, 1.0 mmol scale).

The reaction could be also performed with 4-borono-3-chlorobenzoic acid (40 mg, 0.2 mmol, 1.0 eq.), oxalic acid (36 mg, 0.4 mmol, 2.0 eq), NaBr (52 mg, 0.5 mmol, 2.5 eq.) and  $\text{H}_2\text{O}_2$  (35% aq., 68  $\mu\text{L}$ , 3.5 eq.) in EtOH/ $\text{H}_2\text{O}$  (1.0 mL/0.25 mL) for 20h. 85% yield was obtained by H NMR of crude products with TMB as internal standard.

$^1\text{H NMR}$  (600 MHz, Chloroform-*d*)  $\delta$  7.55 (s, 1H), 7.45 (s, 1H)

$^{13}\text{C NMR}$  (151 MHz,  $\text{CDCl}_3$ )  $\delta$  148.2, 133.6, 131.4, 121.5, 112.2, 110.8

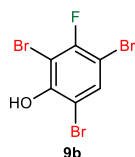

**2,4,6-tribromo-3-fluorophenol (9b)**<sup>25</sup> was prepared according to procedure **IV-1** as described in **Scheme S8**, purified by flash column chromatography (PE: EtOAc = 10: 1), and obtained as yellow solid (98 mg, 37% yield, 1.0 mmol scale).

The reaction could be also performed with 4-borono-2-fluorobenzoic acid (37 mg, 0.2 mmol, 1.0 eq.), oxalic acid (54 mg, 0.6 mmol, 3.0 eq), NaBr (75 mg, 0.72 mmol, 3.6 eq.) and  $\text{H}_2\text{O}_2$  (35% aq., 90  $\mu\text{L}$ , 4.5 eq.) in EtOH/ $\text{H}_2\text{O}$  (1.0 mL/0.3 mL) for 24h. 71% yield was obtained by H NMR of crude products with TMB as internal standard.

$^1\text{H NMR}$  (600 MHz, Chloroform-*d*)  $\delta$  7.67 (d,  $J = 7.2$  Hz, 1H), 6.06 (s, 1H)

$^{13}\text{C NMR}$  (151 MHz, Chloroform-*d*)  $\delta$  155.7 (d,  $J_{\text{C-F}} = 247.6$  Hz), 150.2 (d,  $J^3_{\text{C-F}} = 3.2$  Hz), 133.9, 104.6 (d,  $J^2_{\text{C-F}} = 4.5$  Hz), 100.2 (d,  $J^2_{\text{C-F}} = 24.2$  Hz), 98.9 (d,  $J^2_{\text{C-F}} = 25.7$  Hz)

$^{19}\text{F NMR}$  (565 MHz, Chloroform-*d*)  $\delta$  -96.43 (d,  $J = 6.9$  Hz).

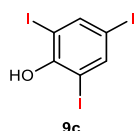

**2-chloro-4,6-diiodophenol (9c)**<sup>26</sup> was prepared according to procedure **IV-1** as described in **Scheme S8**, and obtained as gray solid (60 mg, 14% yield, 1.0 mmol scale).

The reaction could be also performed with 4-boronobenzoic acid (83 mg, 0.5 mmol, 1.0 eq.), HOAc (90 mg, 1.5 mmol, 3.0 eq), KI (305 mg, 1.8 mmol, 3.6 eq.) and  $\text{H}_2\text{O}_2$  (35% aq., 250  $\mu\text{L}$ , 5.0 eq.) in EtOH/ $\text{H}_2\text{O}$  (2.0 mL/0.3 mL)

for 24h. 45% yield was obtained by <sup>1</sup>H NMR of crude products.

<sup>1</sup>H NMR (600 MHz, Chloroform-*d*) δ 7.93 (s, 2H), 5.72 (s, 1H)

<sup>13</sup>C NMR (151 MHz, CDCl<sub>3</sub>) δ 153.9, 146.5, 83.50, 83.45

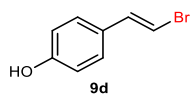

**(*E*)-2,6-dibromo-4-(2-bromovinyl)phenol (9d)**<sup>27</sup> was prepared according to procedure **IV-2** as described in **Scheme S9**. The reaction was performed with (*E*)-3-(4-boronophenyl)acrylic acid (39 mg, 0.2 mmol, 1.0 eq.), Na<sub>2</sub>WO<sub>4</sub>•2H<sub>2</sub>O (3.3 mg, 5mol%), oxalic acid (18 mg, 0.2 mmol, 1.0 eq), NaBr (26 mg, 0.25 mmol, 1.25 eq.) and H<sub>2</sub>O<sub>2</sub> (35% aq., 50μL, 2.5eq.) in EtOH/MeCN/H<sub>2</sub>O (1.0 mL/0.5 mL/0.3 mL) for 20h. 66% yield was obtained by <sup>1</sup>H-NMR of crude products with TMB as internal standard.

When the reaction was performed with (*E*)-3-(4-boronophenyl)acrylic acid (**8d**, 96 mg, 0.5 mmol, 1.0 eq.), Na<sub>2</sub>WO<sub>4</sub>•2H<sub>2</sub>O (9.7 mg, 0.025 mmol, 5 mol %), HOAc (60 mg, 1.0 mmol, 2.0 eq.), KBr (59.5 mg, 0.5 mmol, 1.0 eq.), and UHP (47mg, 0.5 mmol, 1.0 eq.) in EtOH/H<sub>2</sub>O (2.0 mL/0.3 mL) was added H<sub>2</sub>O<sub>2</sub> (35% aq., 95 uL, 1.1.0 mmol, 2.2 eq.) in the open air. The mixture was stirred at room temperature for around 12 h. The desired product was obtained as white solid (22 mg, 30% yield) by flash column chromatography.

<sup>1</sup>H NMR (600 MHz, Chloroform-*d*) δ 7.21 – 7.16 (m, 2H), 7.03 (d, *J* = 14.0 Hz, 1H), 6.80 – 6.77 (m, 2H), 6.60 (d, *J* = 14.0 Hz, 1H).

<sup>13</sup>C NMR (151 MHz, CDCl<sub>3</sub>) δ 155.6, 136.4, 129.0, 127.6, 115.7, 104.1

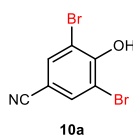

**3,5-dibromo-4-hydroxybenzonitrile (10a)**<sup>28</sup> was prepared according to procedure **V-1** as described in **Scheme S10**, purified by flash column chromatography (PE: EtOAc = 10: 1), obtained as white solid (133.8 mg, 48% yield, 1.0 mmol scale).

<sup>1</sup>H NMR (600 MHz, Chloroform-*d*) δ 7.77 (s, 2H), 6.53 (s, 1H)

<sup>13</sup>C NMR (151 MHz, CDCl<sub>3</sub>) δ 153.6, 135.6, 116.2, 110.4, 106.5

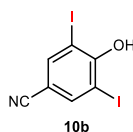

**4-hydroxy-3,5-diiodobenzonitrile (10b)**<sup>29</sup> was prepared according to procedure **V-1** as described in **Scheme S10**, and obtained as white solid (245 mg, 66% yield, 1.0 mmol scale)

<sup>1</sup>H NMR (600 MHz, Chloroform-*d*) δ 7.97 (s, 2H), 6.26 (s, 1H)

<sup>13</sup>C NMR (151 MHz, CDCl<sub>3</sub>) δ 157.6, 142.6, 115.6, 107.9, 82.0

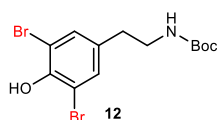

**Tert-butyl (3,5-dibromo-4-hydroxyphenethyl)carbamate (12)**<sup>1</sup> was prepared according to procedure **III-2** as



described in **Scheme S5**, purified by flash column chromatography (PE: EtOAc = 20: 1), and obtained as white solid (141 mg, 89% yield, 0.4 mmol scale).

**<sup>1</sup>H NMR** (600 MHz, Chloroform-*d*)  $\delta$  7.21 (s, 2H), 5.81 (br, 1H), 4.50 (s, 1H), 3.24 (t, *J* = 6.6 Hz, 2H), 2.63 (p, *J* = 5.7 Hz, 2H), 1.45–1.33 (m, 9H).

**<sup>13</sup>C NMR** (151 MHz, Chloroform-*d*)  $\delta$  155.8, 148.0, 133.6, 132.2, 109.8, 79.5, 41.6, 34.7, 28.4

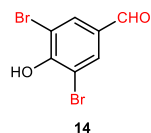

**3,5-dibromo-4-hydroxybenzaldehyde (14)**<sup>24</sup> was prepared according to procedure **III-2** as described in **Scheme S5**, obtained as gray solid (0.94g, quantitative yield, 3.0 mmol scale)

**<sup>1</sup>H NMR** (600 MHz, DMSO-*d*<sub>6</sub>)  $\delta$  9.60 (s, 1H), 7.94 (s, 2H).

**<sup>13</sup>C NMR** (151 MHz, DMSO-*d*<sub>6</sub>)  $\delta$  189.6, 156.1, 133.7, 130.5, 112.0

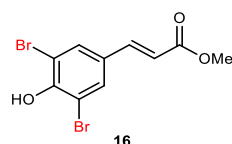

**Methyl (E)-3-(3,5-dibromo-4-hydroxyphenyl)acrylate (16)**<sup>30</sup> was prepared according to procedure **V-3** as described in **Scheme S11**, obtained as white solid (290 mg, 87% yield, 1.0 mmol scale)

**<sup>1</sup>H NMR** (600 MHz, DMSO-*d*<sub>6</sub>)  $\delta$  7.92 (s, 2H), 7.51 (d, *J* = 16.0 Hz, 1H), 6.56 (d, *J* = 16.0 Hz, 1H), 3.70 (s, 3H).

**<sup>13</sup>C NMR** (151 MHz, Chloroform-*d* + DMSO-*d*<sub>6</sub>)  $\delta$  166.47, 152.04, 141.32, 131.26, 128.15, 116.96, 111.27, 51.23

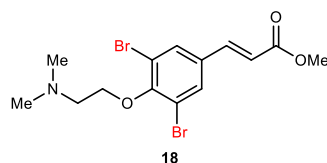

**Methyl (E)-3-(3,5-dibromo-4-(2-(dimethylamino)ethoxy)phenyl)acrylate (18)**<sup>2</sup> was prepared according to procedure **V-3** as described in **Scheme S11**, obtained as yellow liquid (28 mg, 34% yield, 0.2 mmol scale; 53% yield bases on recycled starting material **15** (22 mg))

**<sup>1</sup>H NMR** (600 MHz, Chloroform-*d*)  $\delta$  7.65 (s, 2H), 7.50 (d, *J* = 16.0 Hz, 1H), 6.35 (d, *J* = 16.0 Hz, 1H), 4.15 (t, *J* = 5.8 Hz, 2H), 3.80 (s, 3H), 2.89 (t, *J* = 5.8 Hz, 2H), 2.43 (s, 6H)

**<sup>13</sup>C NMR** (151 MHz, Chloroform-*d*)  $\delta$  166.7, 154.6, 141.2, 133.0, 132.0, 119.7, 118.8, 70.9, 58.6, 51.9, 45.7

## IX. NMR spectra of starting materials, intermediates and products

K-2-32. 1. f1d

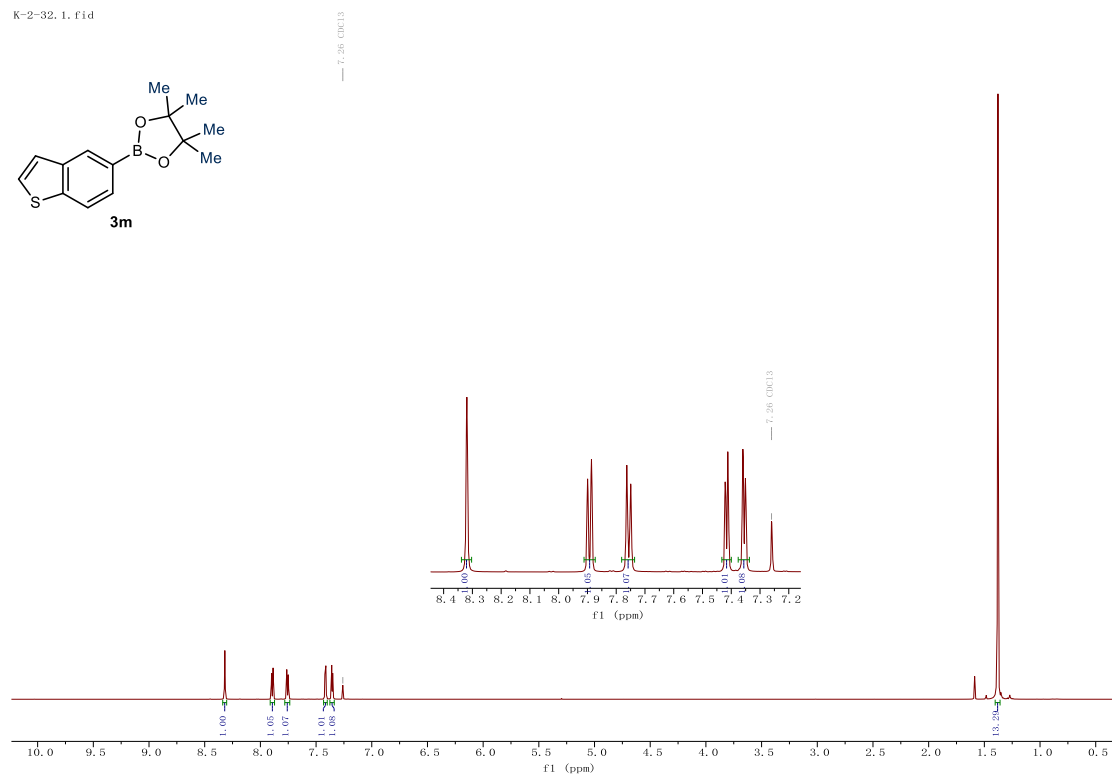

K-2-32. 2. f1d

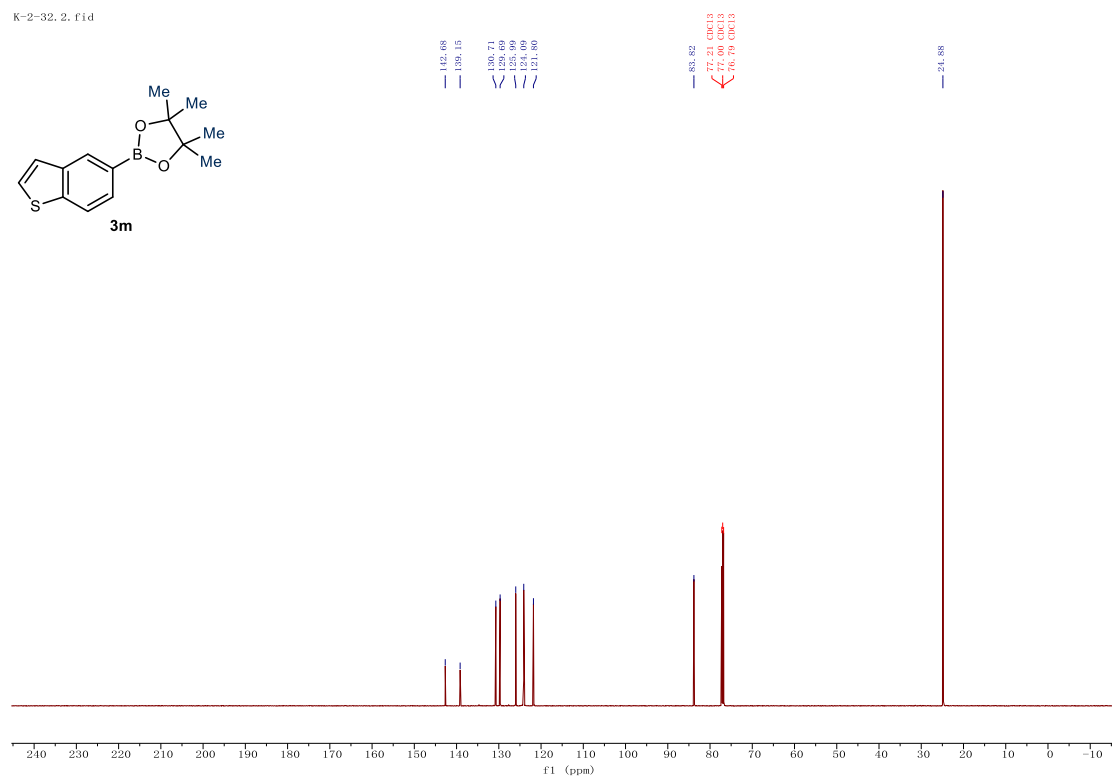

K-3-16(2). 1. f1d

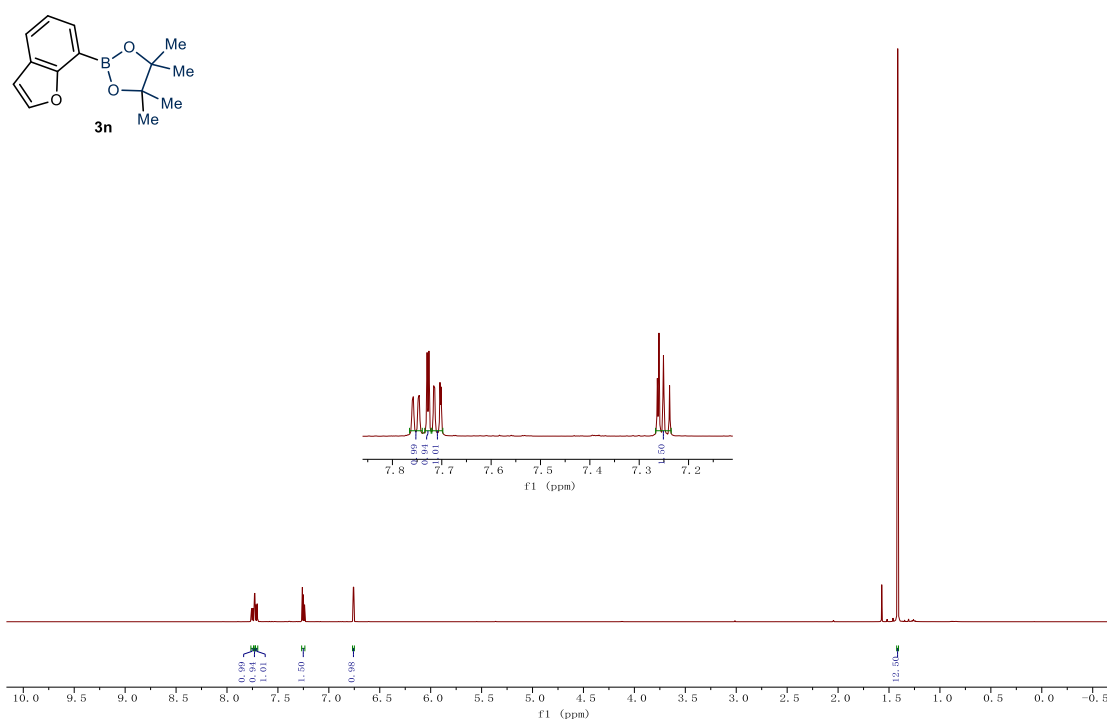

K-3-16(2). 2. f1d

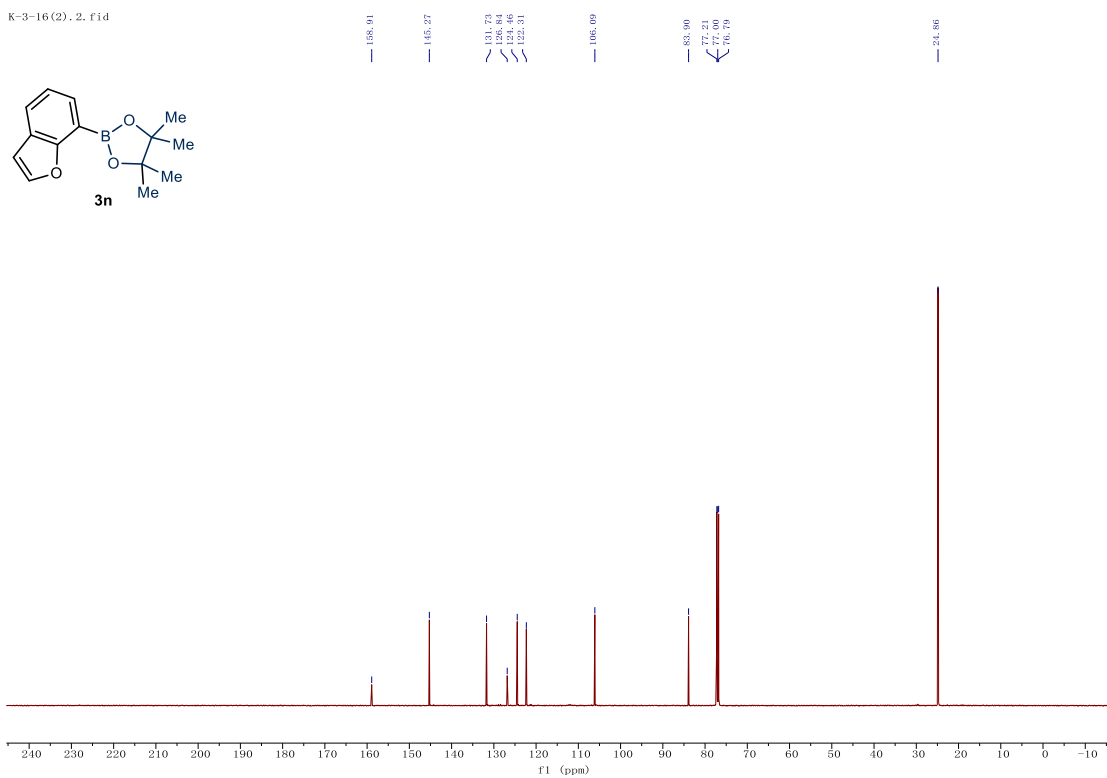

K-2-31, 1, f1d

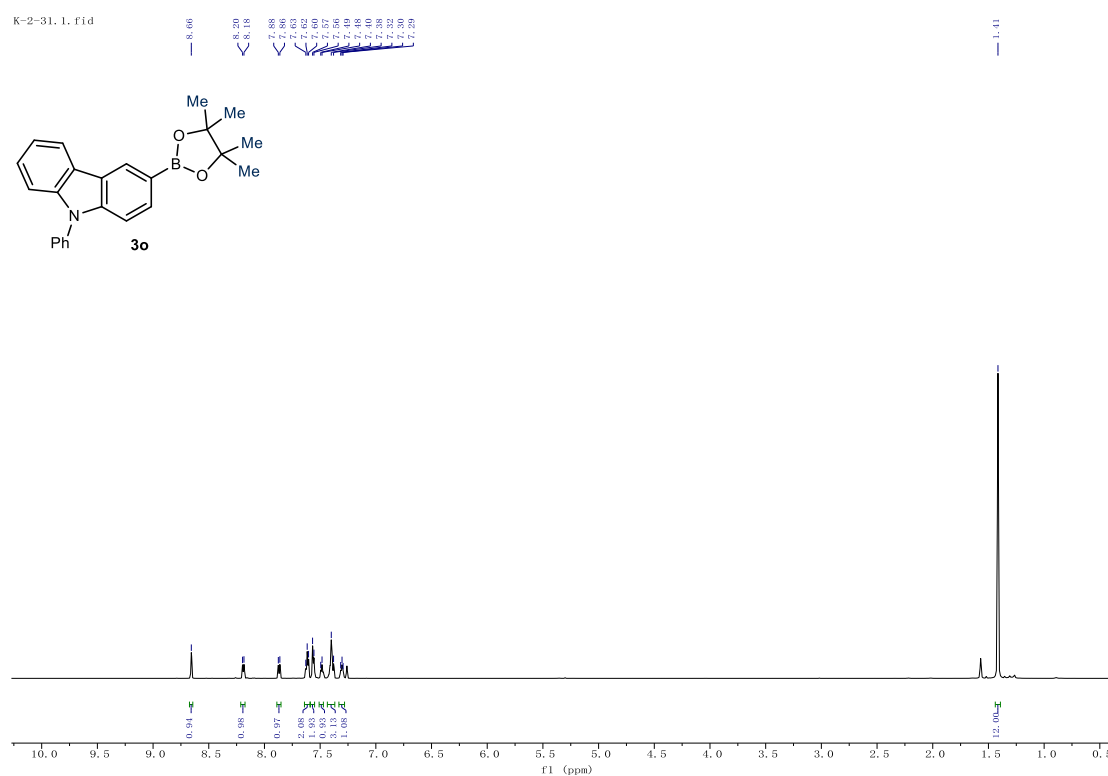

K-2-31, 2, f1d

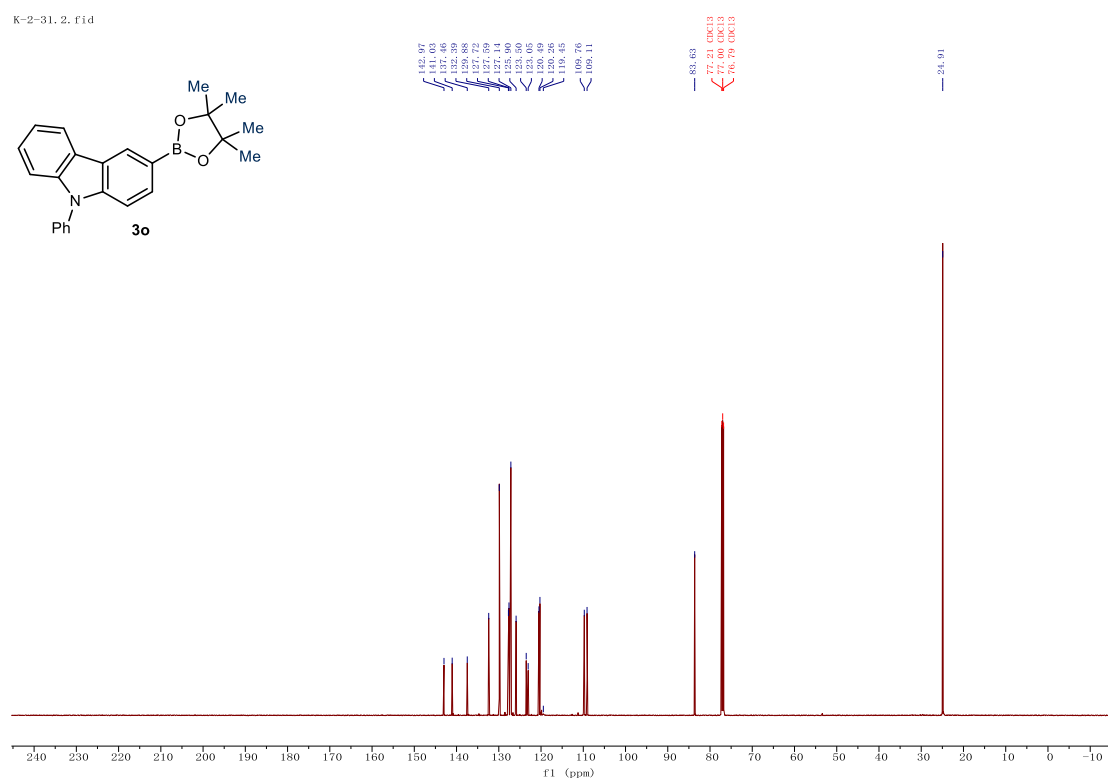

K-2-65, 1, fid

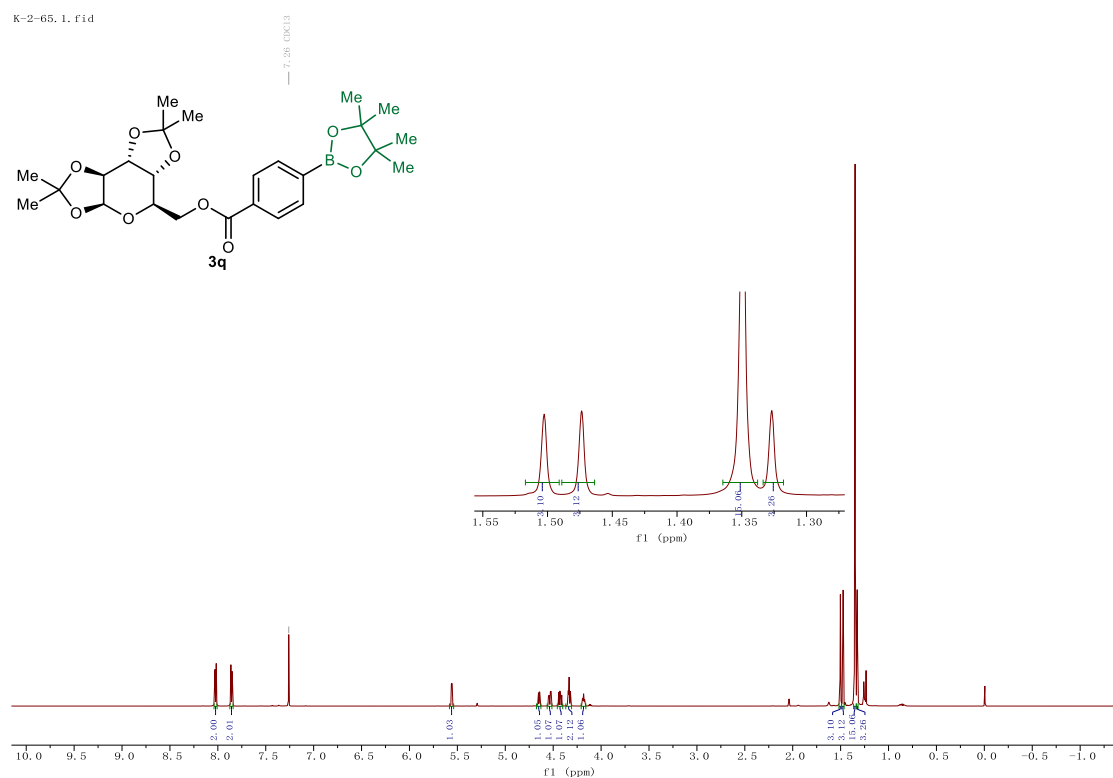

K-2-65, 2. fid

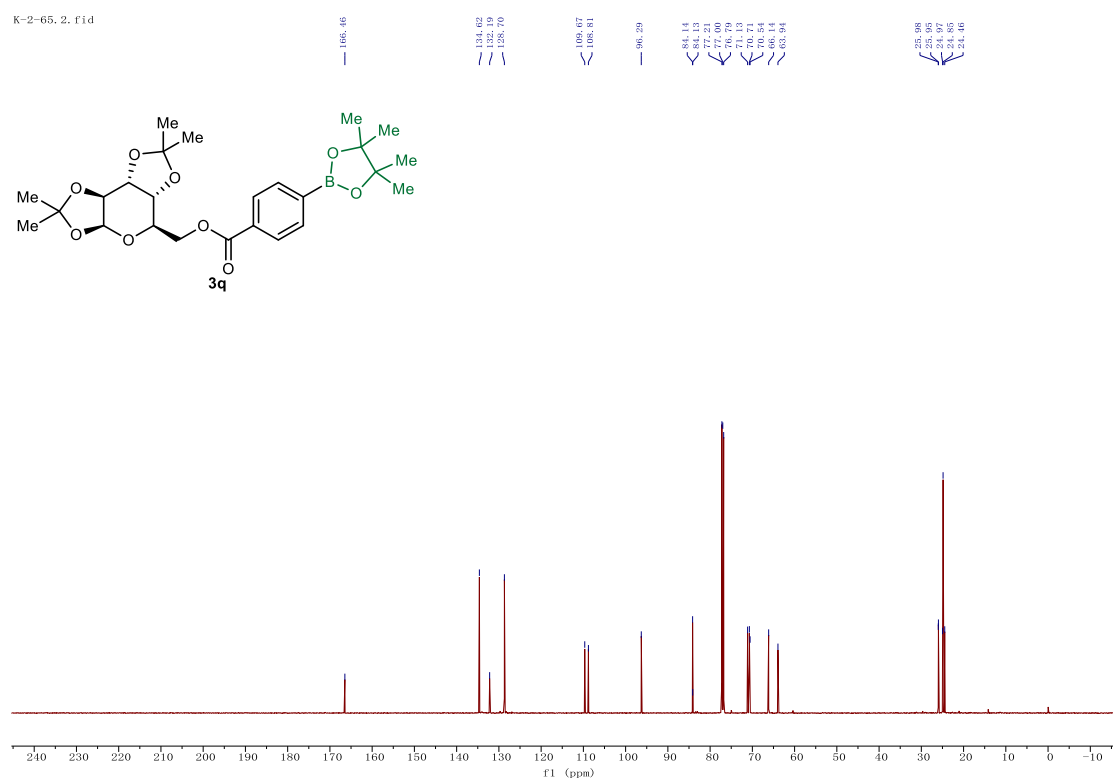

K-2-60, 1, f1d

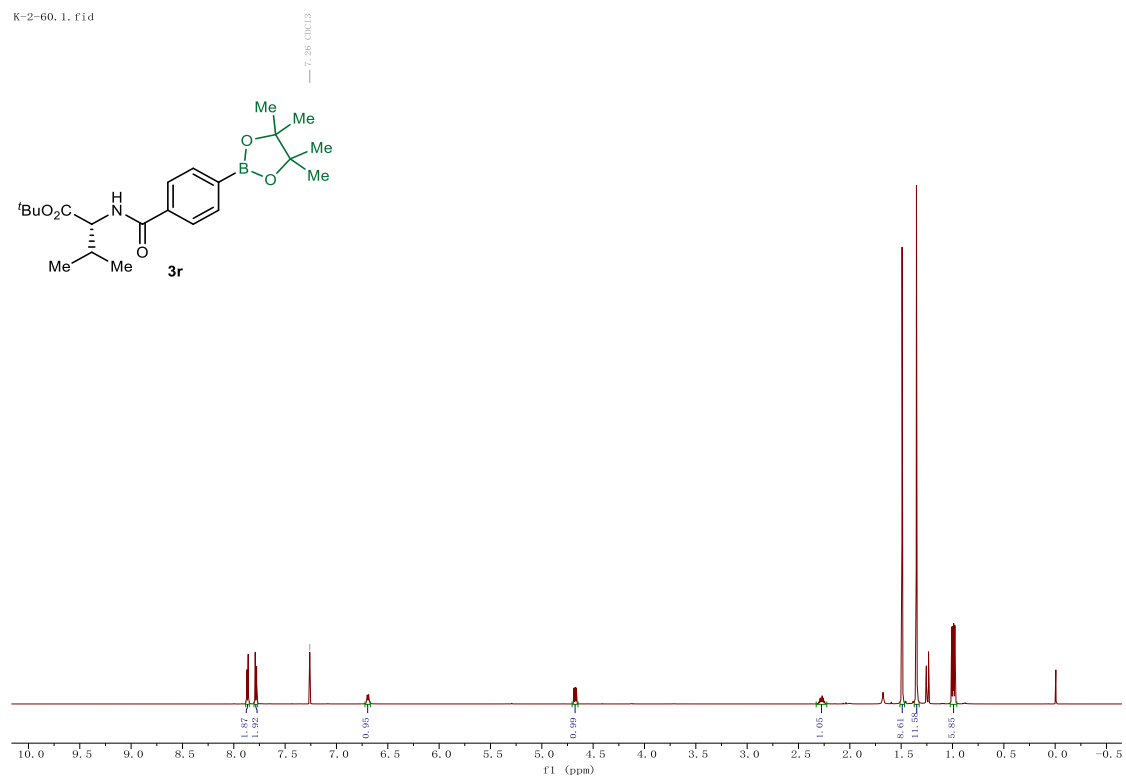

K-2-60, 2, 1, 1r

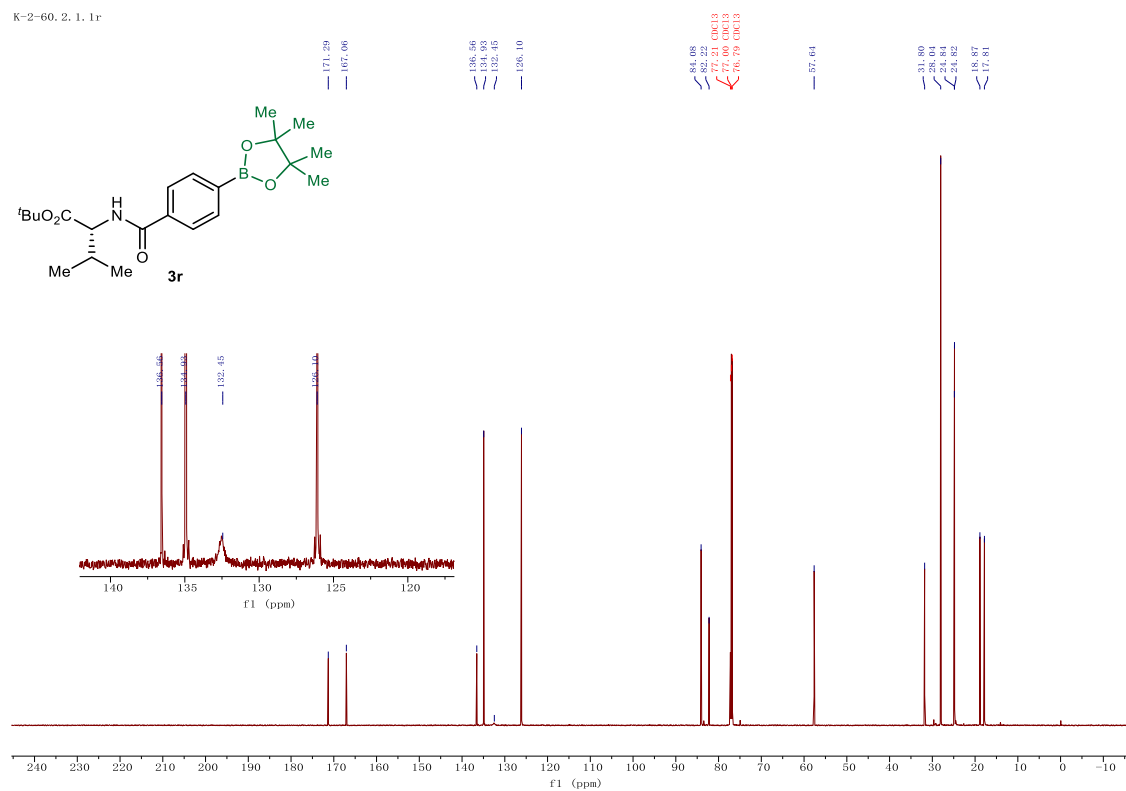

K-2-61.2.fid

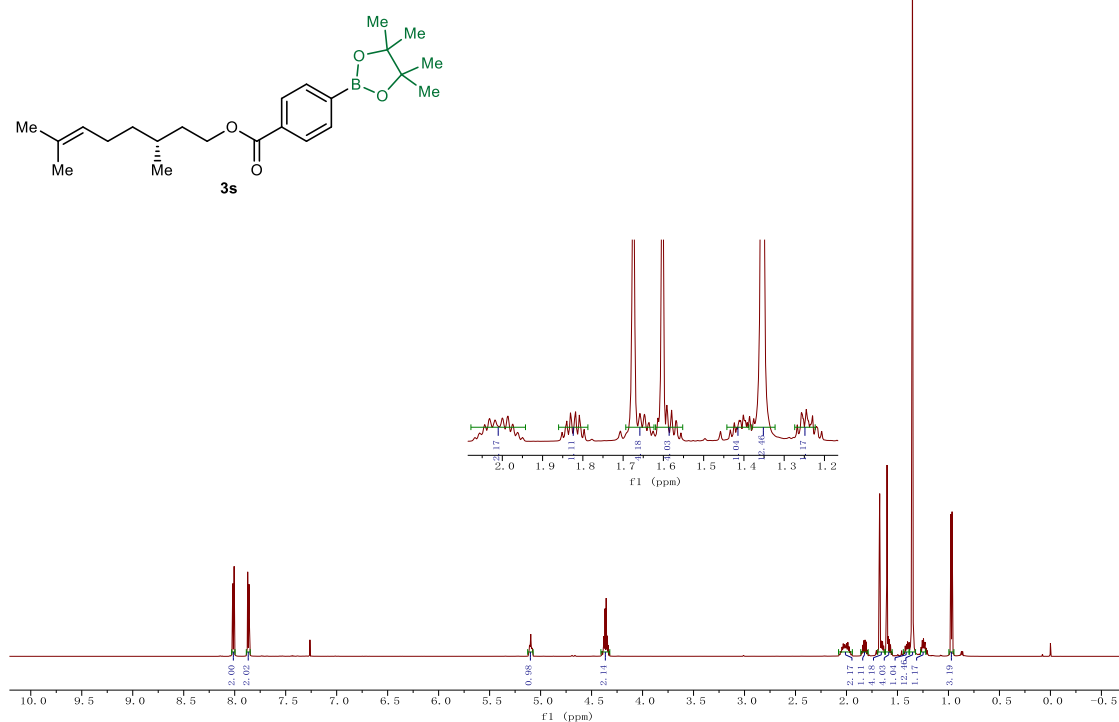

K-2-61.3.fid

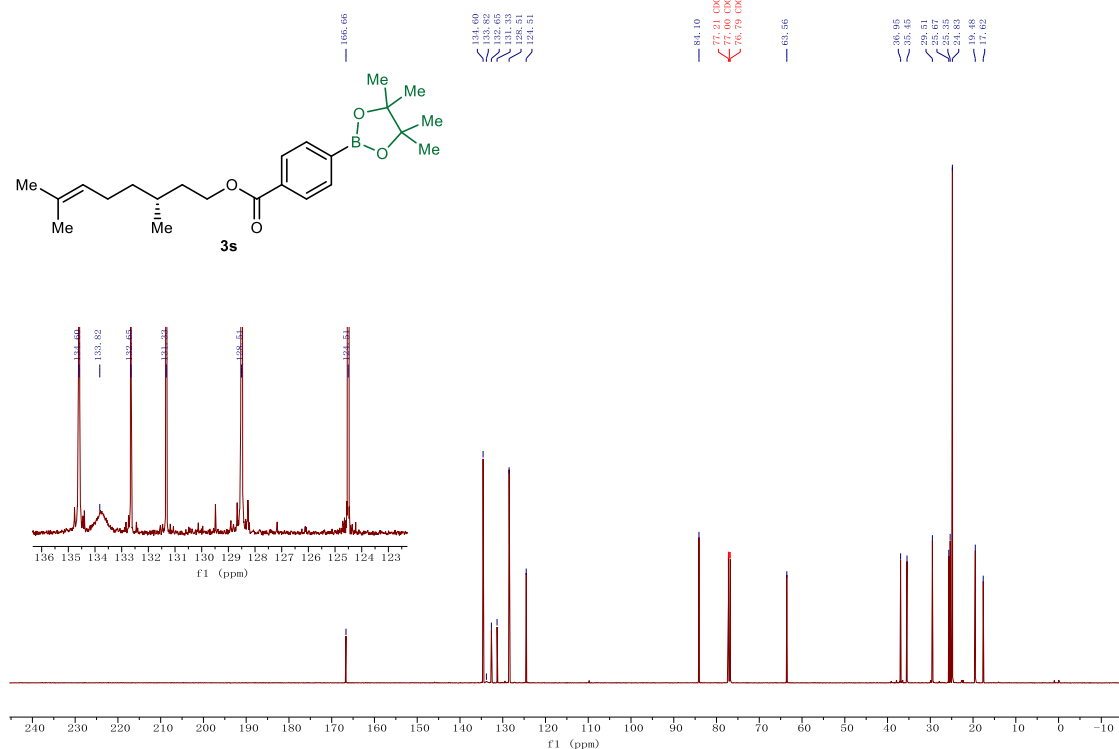

K-2-34. 2. fid

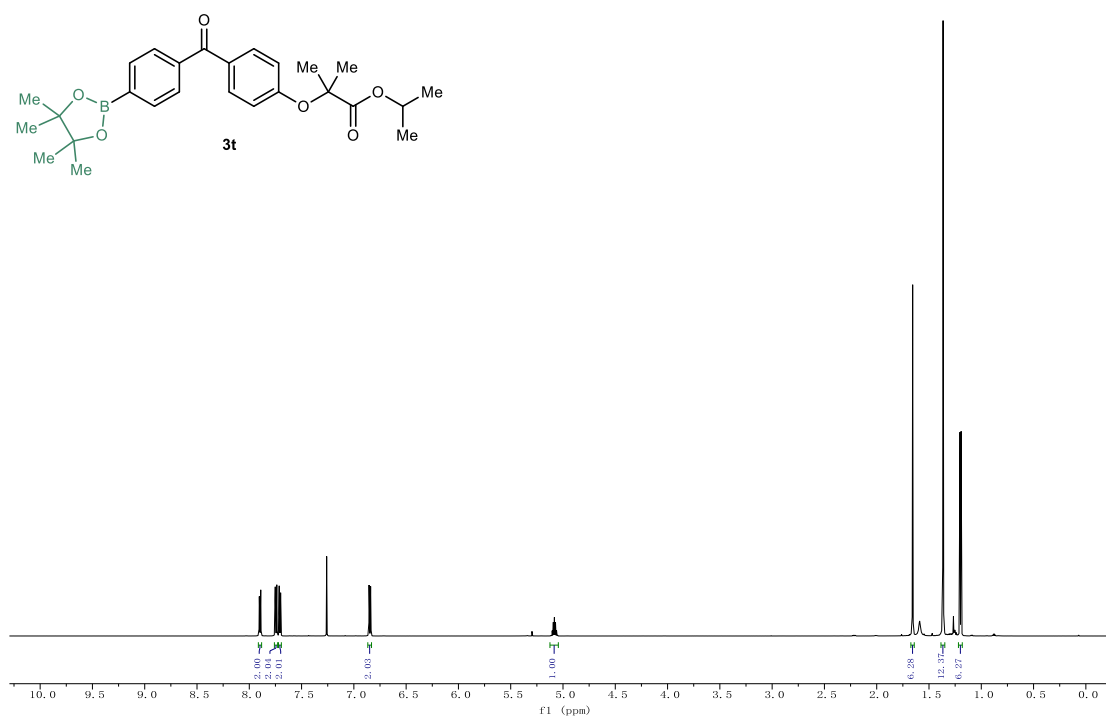

K-2-34. 2. fid

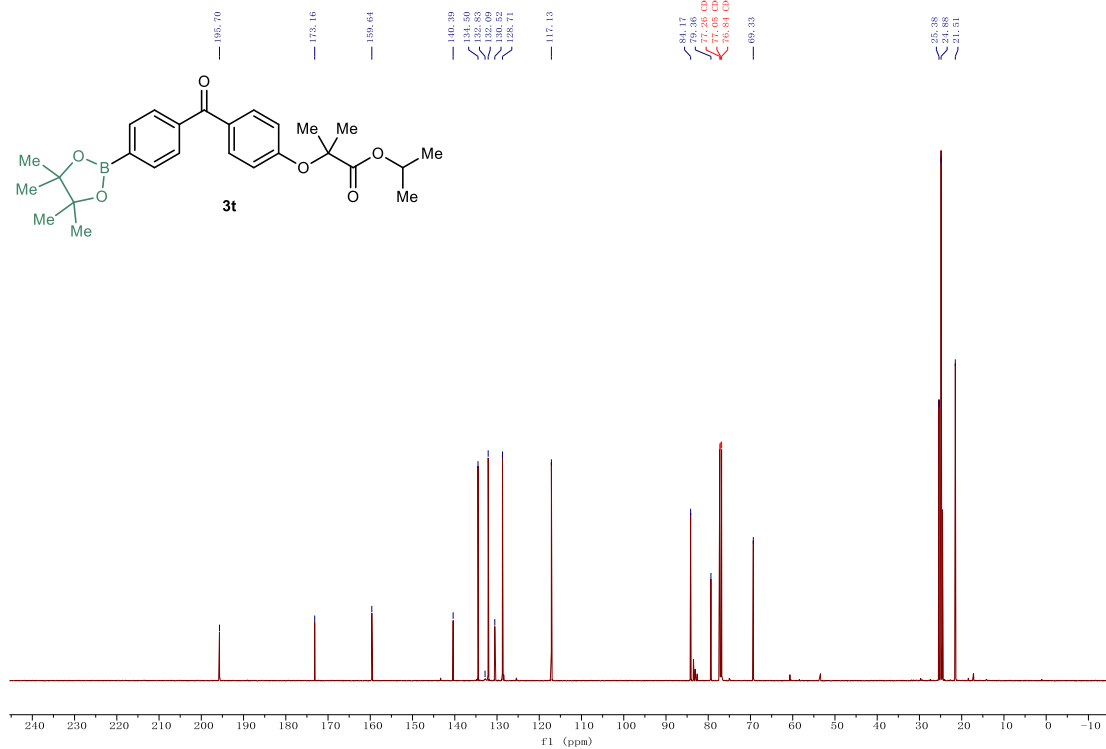





K-3-17(2). 1. fid

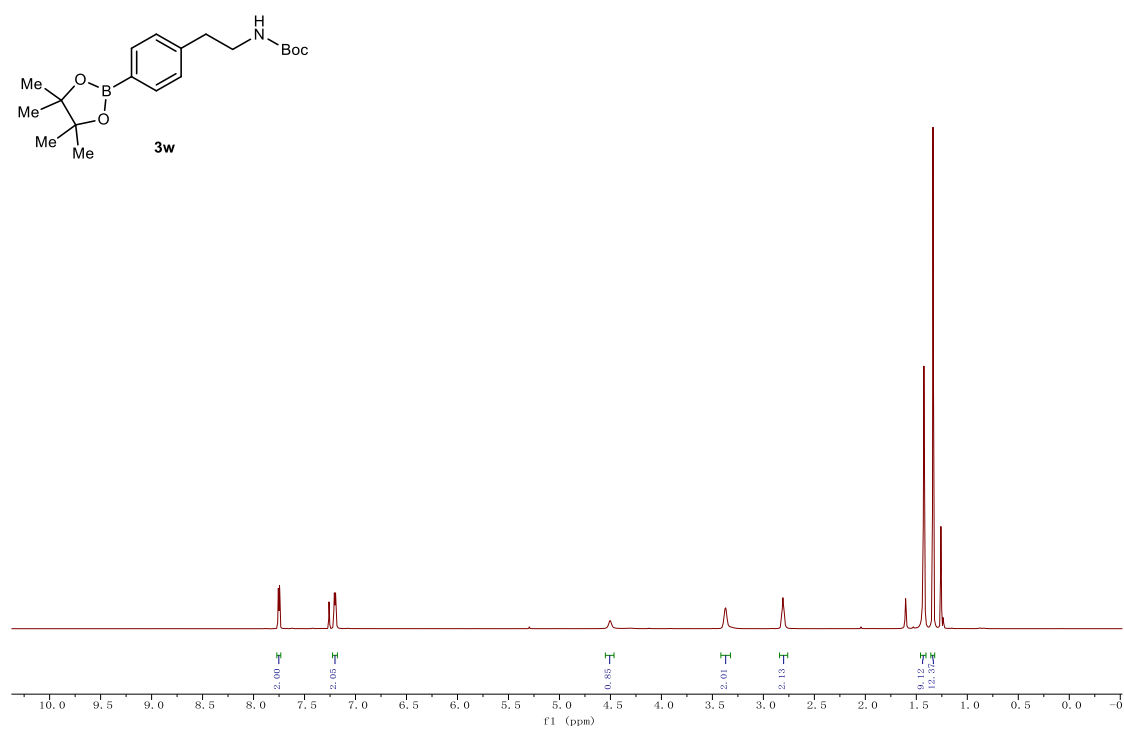

K-3-17(2). 2. fid

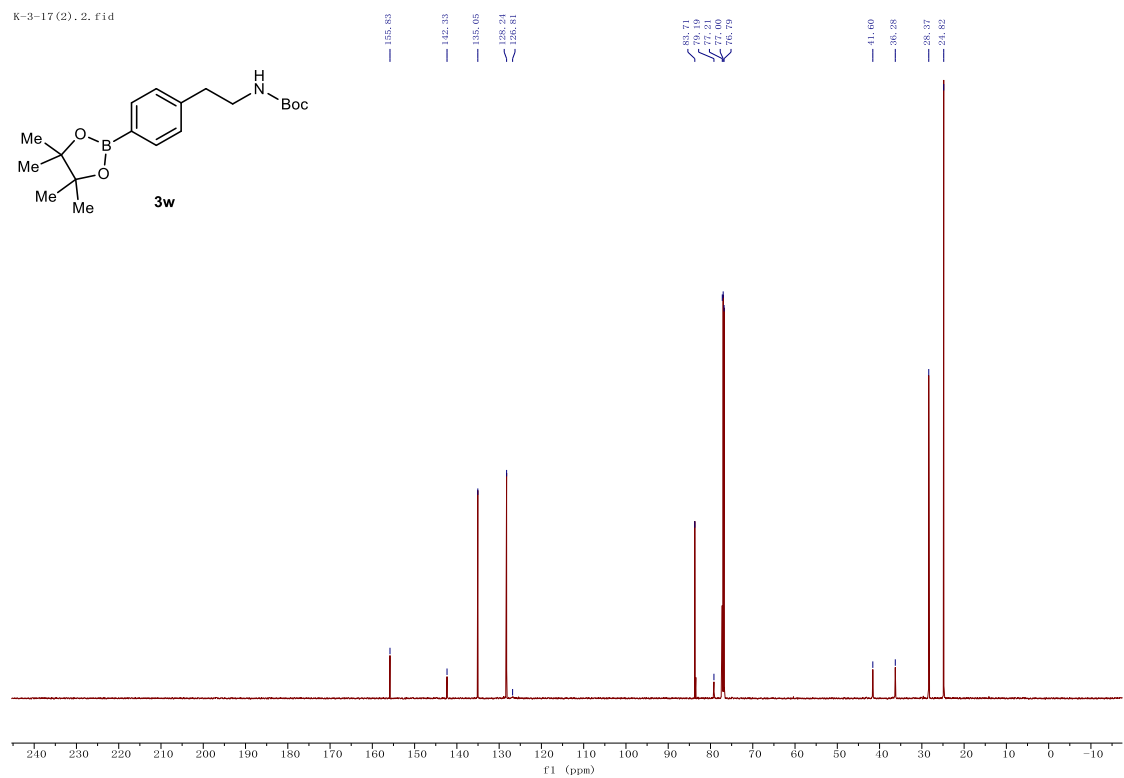

K-2-66, 1, f1d

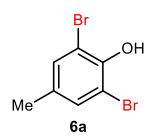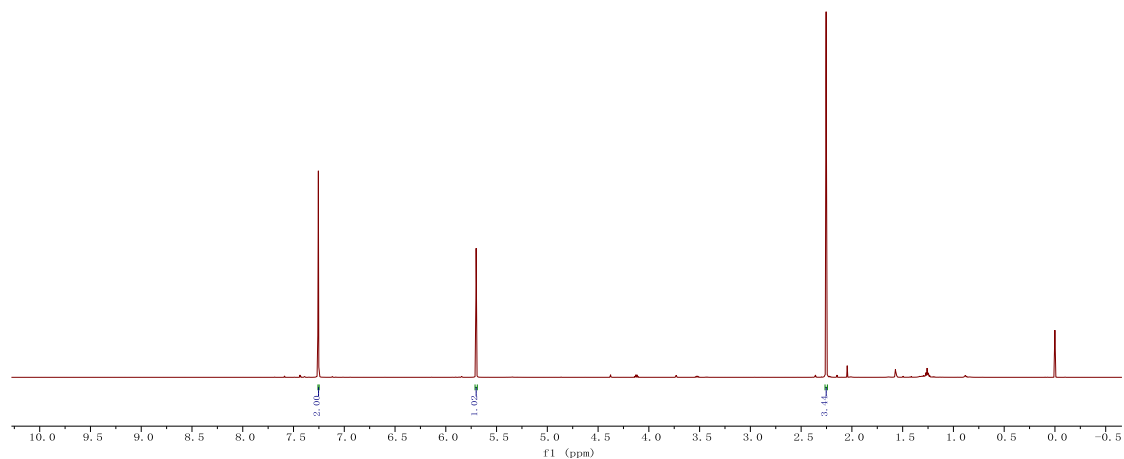

K-2-66, 2, f1d

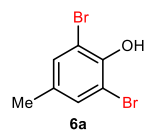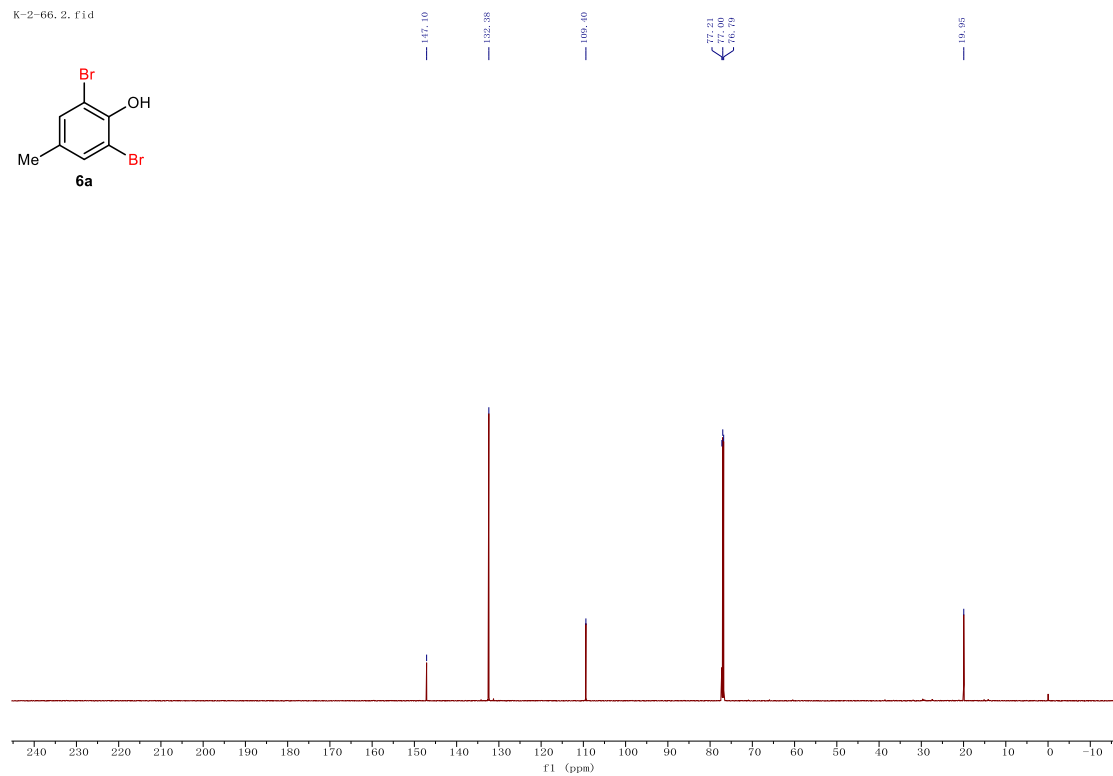

CZL-E. 1. fid

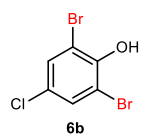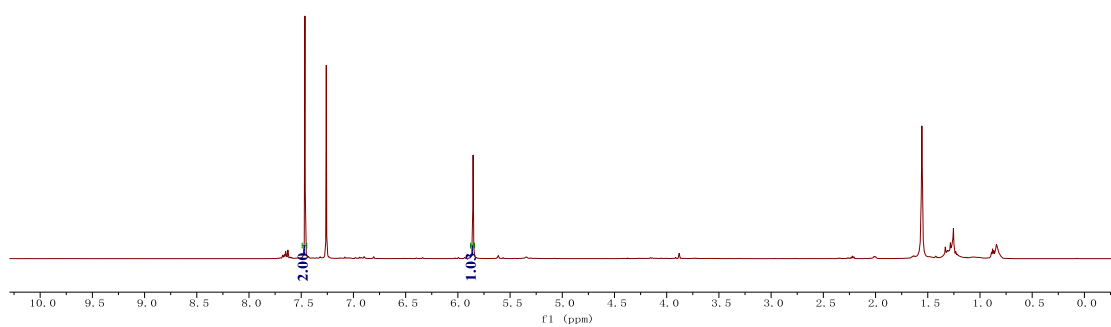

CZL-1-38E. 1. fid

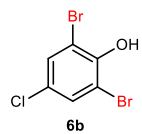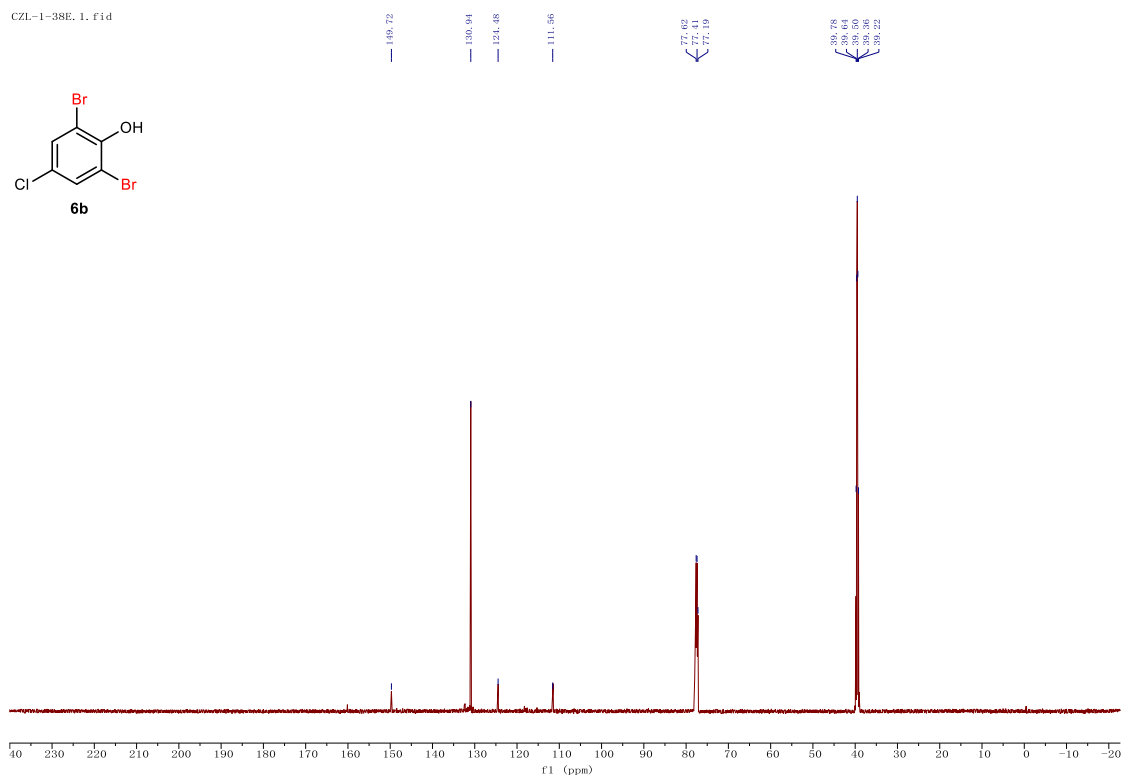

K-3-43, 1, f1d

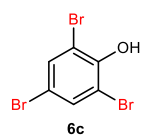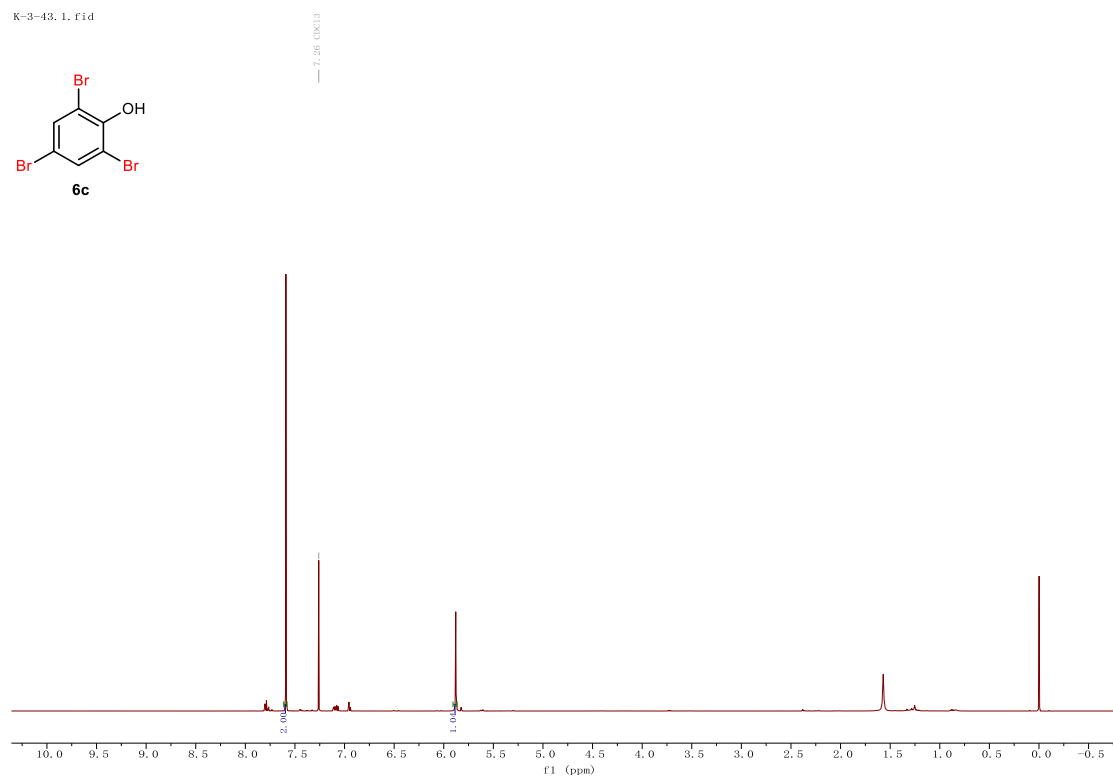

K-3-43, 2, f1d

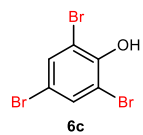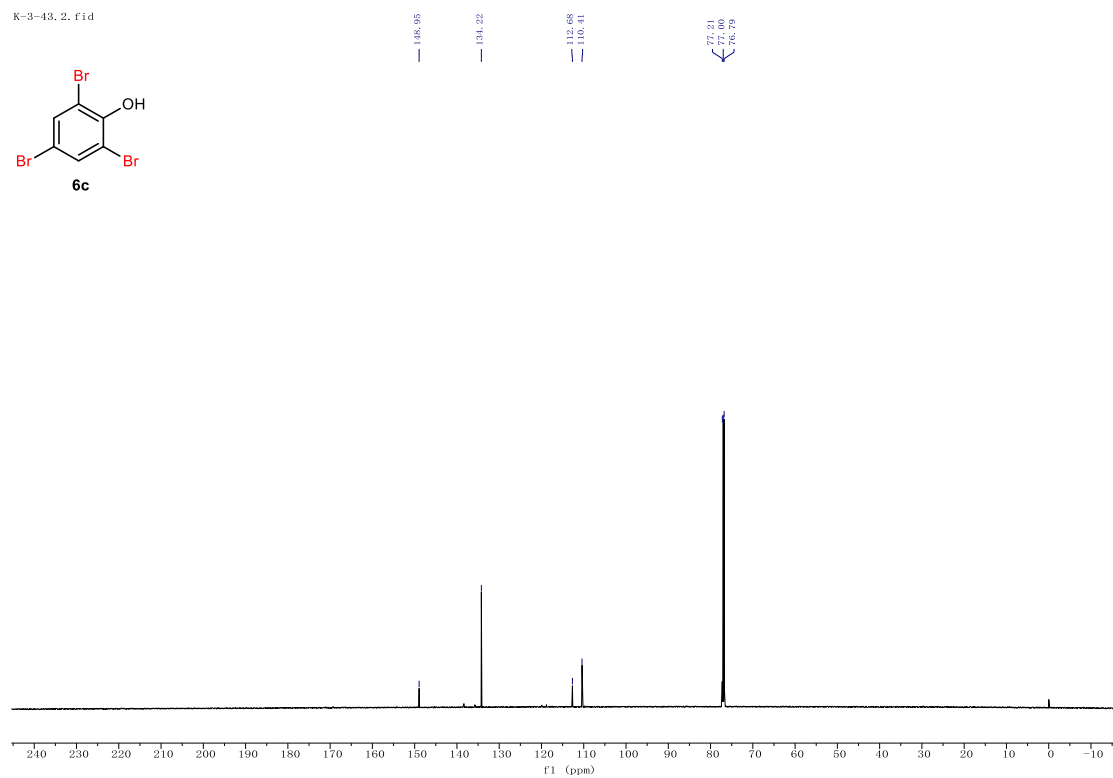

K-3-7, 1. fid

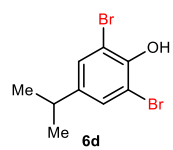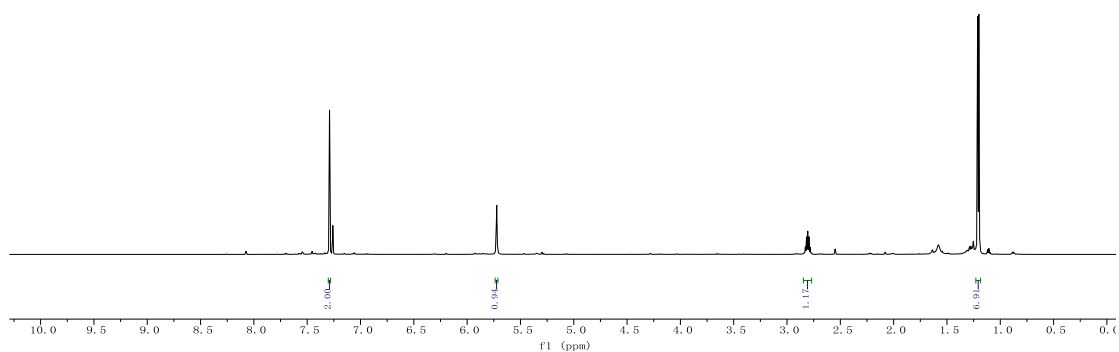

K-3-7-repeat, 1. fid

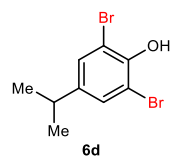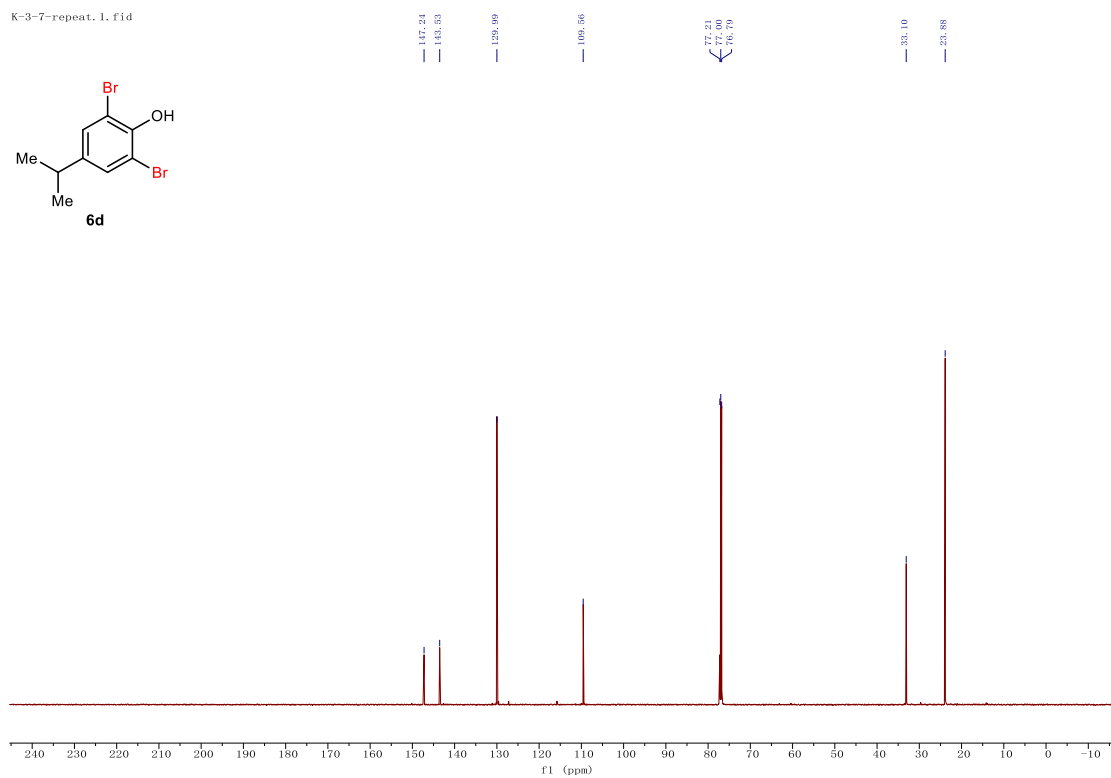

K-2-70repeat, 1.fid

7.26 CDCl3

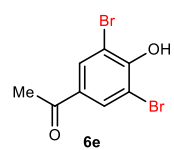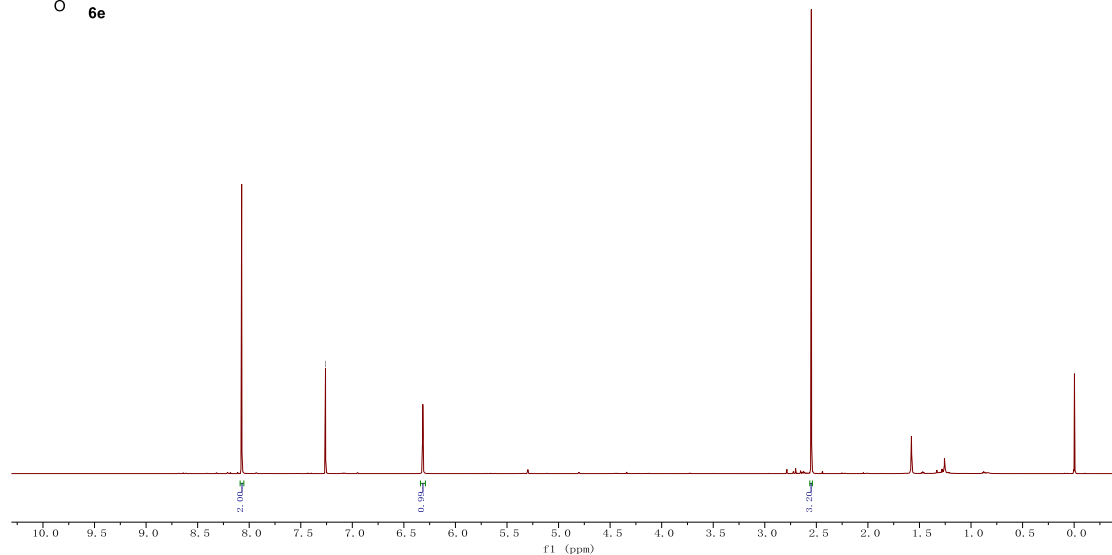

K-2-70repeat, 2.fid

194.28

153.32

132.60  
131.89

110.69

77.51  
77.00  
76.79

26.23

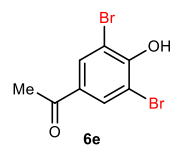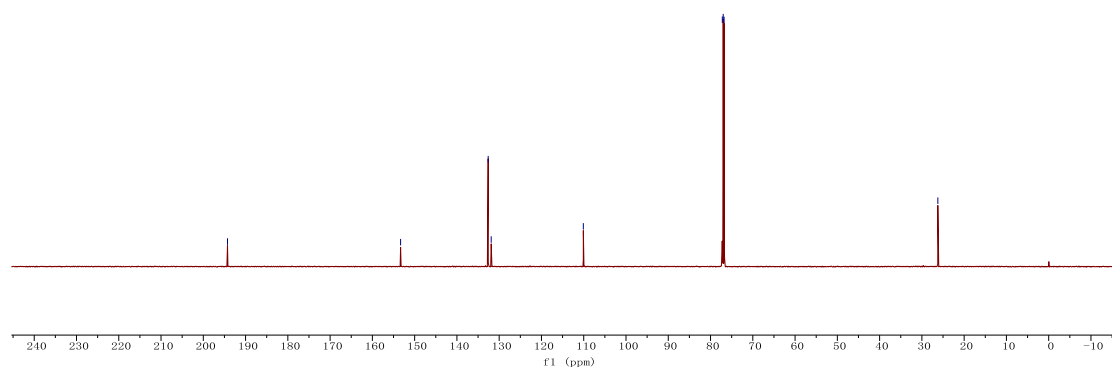

K-2-70repeat, 1. fid

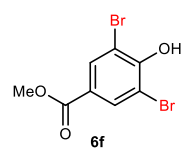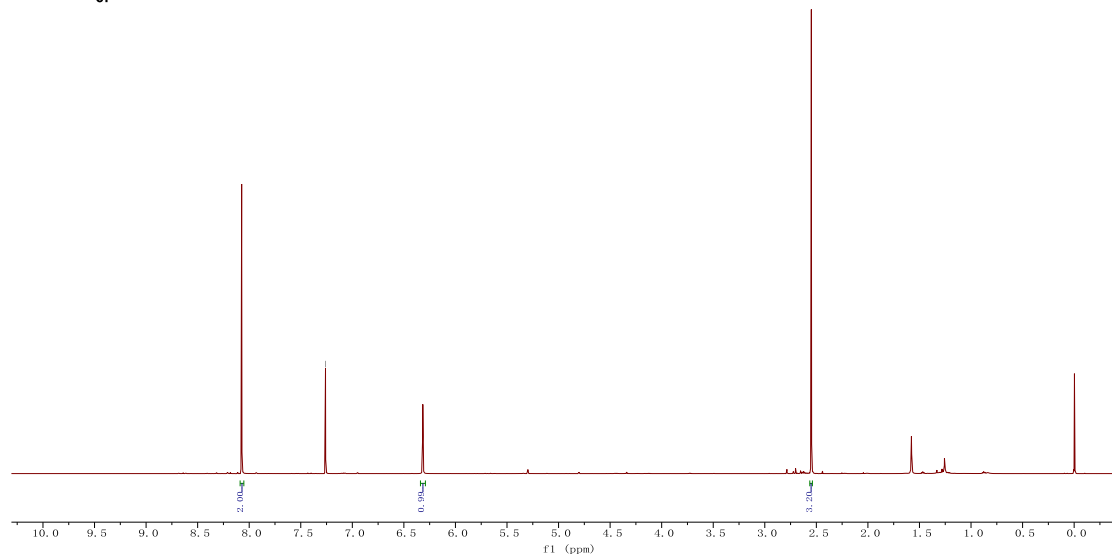

K-2-69repeat, 1. fid

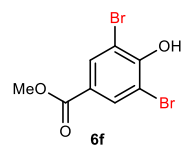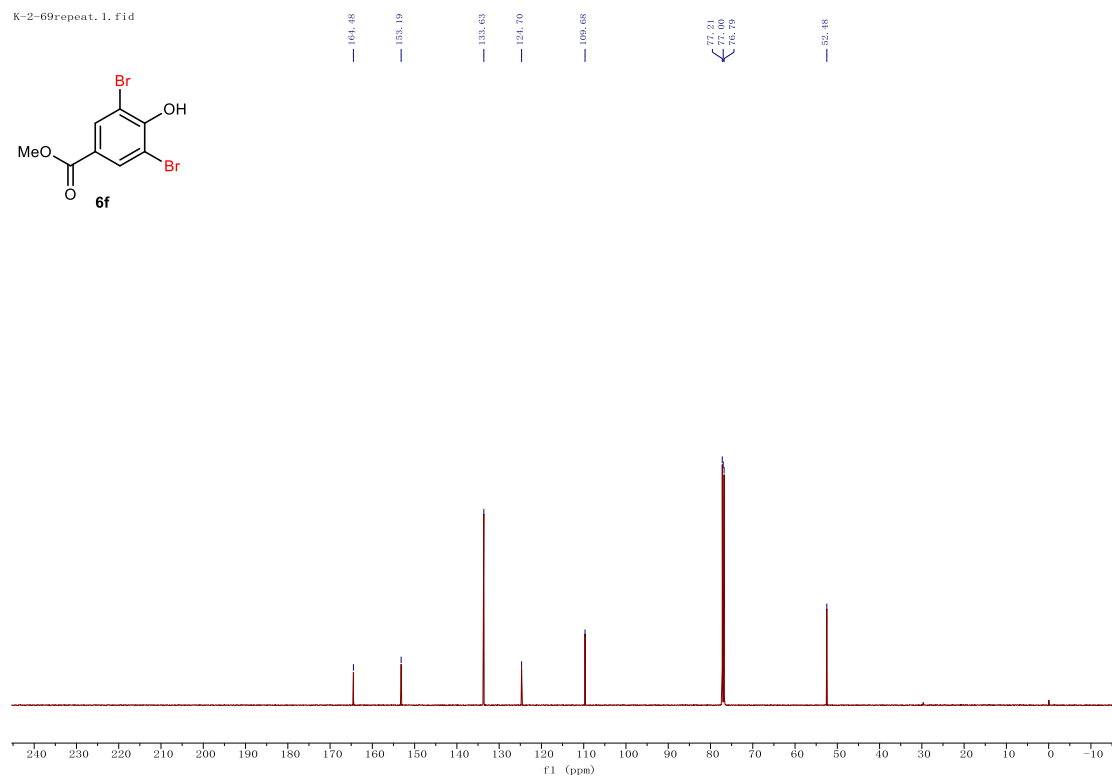



K-2-72repeat, 1. fid

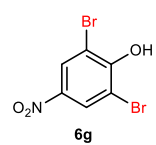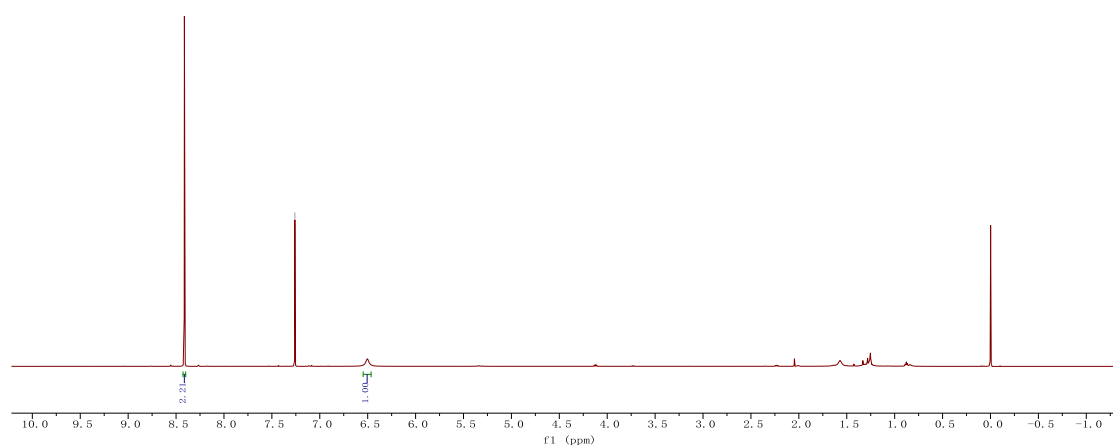

K-2-72repeat, 2. fid

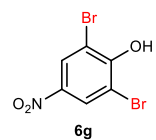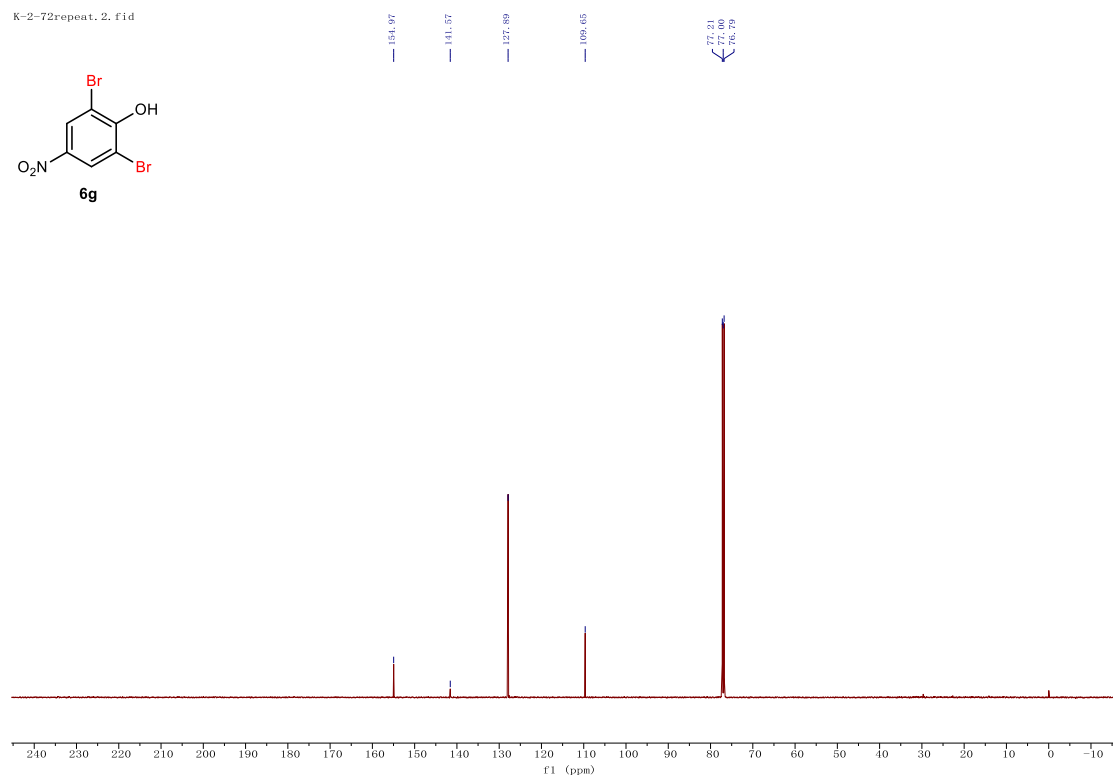

K-3-67. 3. fid

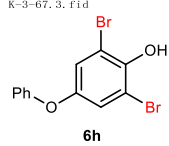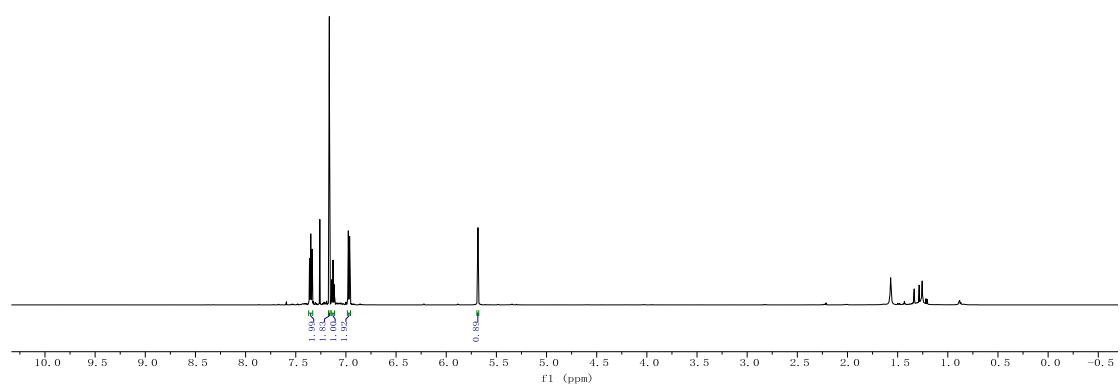

K-3-67. 2. fid

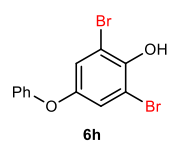

156.97  
150.72  
140.79  
129.93  
129.92  
128.73  
128.68  
118.43  
105.69  
77.71  
77.00  
76.79

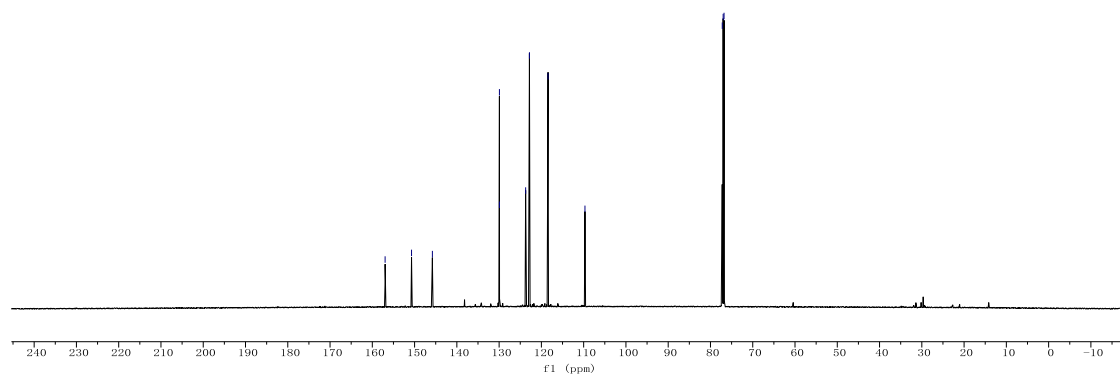

K-2-75(1).1.fid

7.26 (m, 1H)

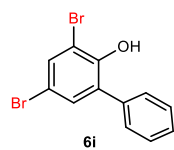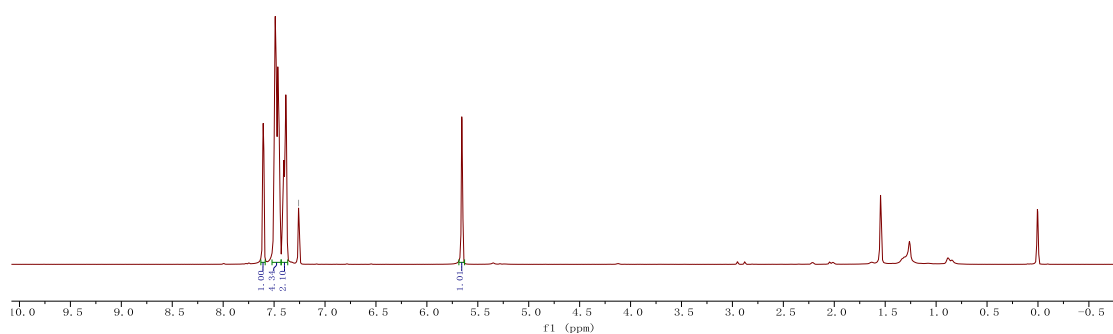

K-2-75.1.fid

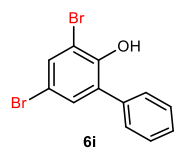

148.61  
135.85  
133.31  
132.74  
132.55  
129.02  
128.69  
128.31  
112.65  
111.68  
77.00

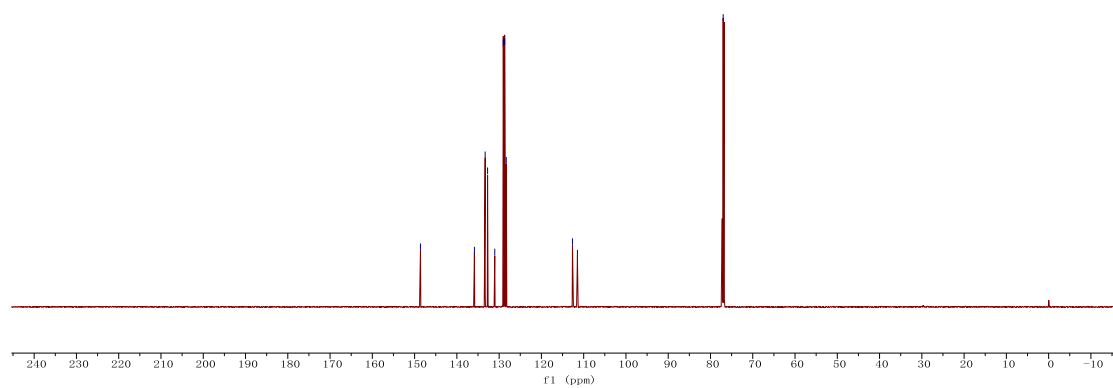

K-2-76, 2, fid

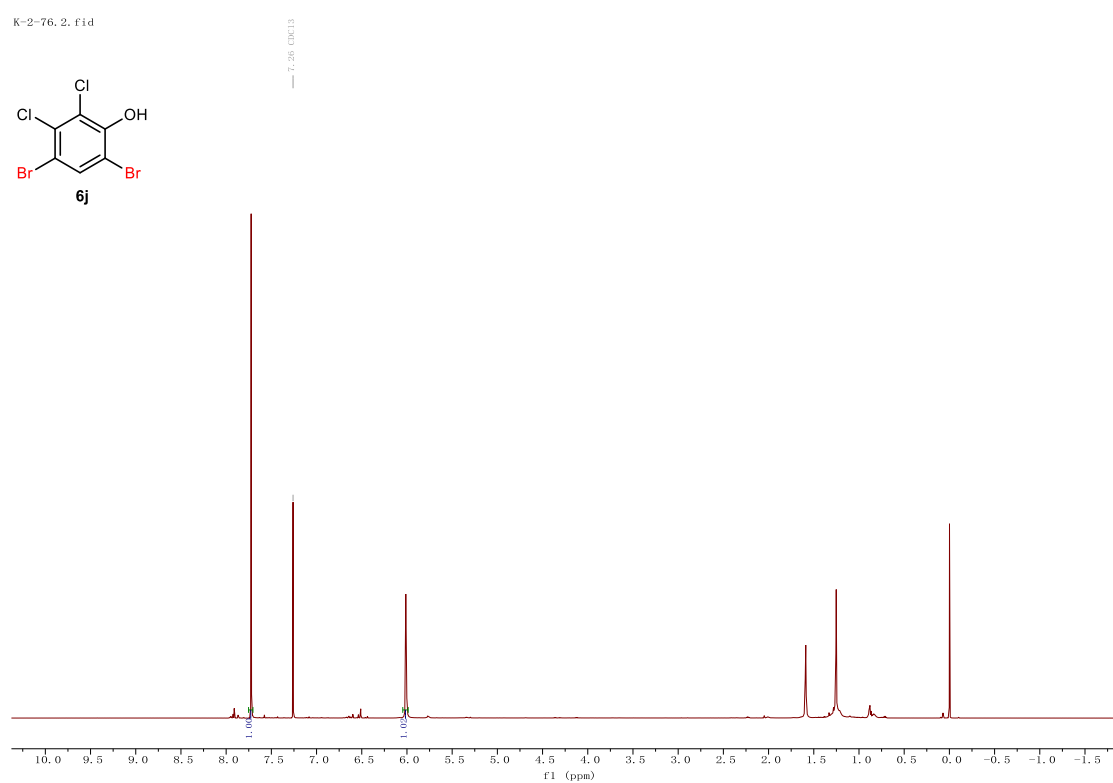

K-2-76, 3, fid

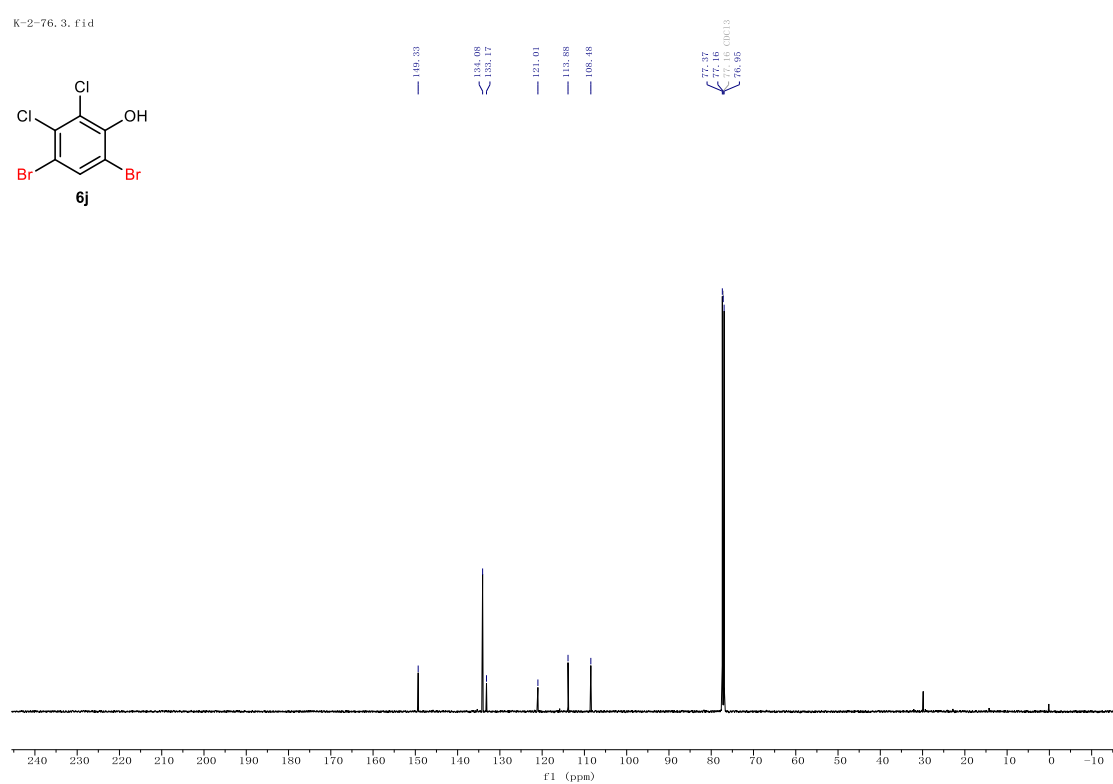

CZL-D, 1, f1d

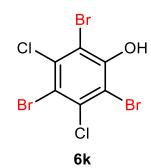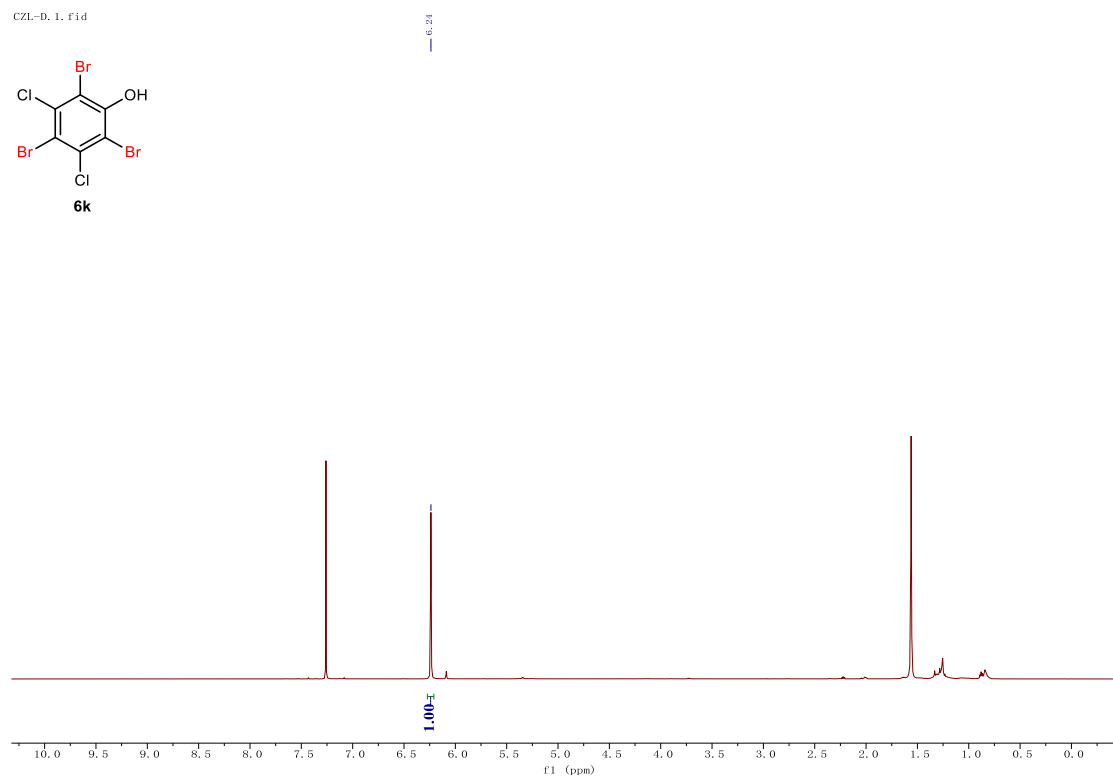

CZL-1-38D, 1, f1d

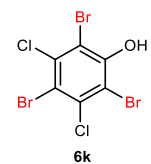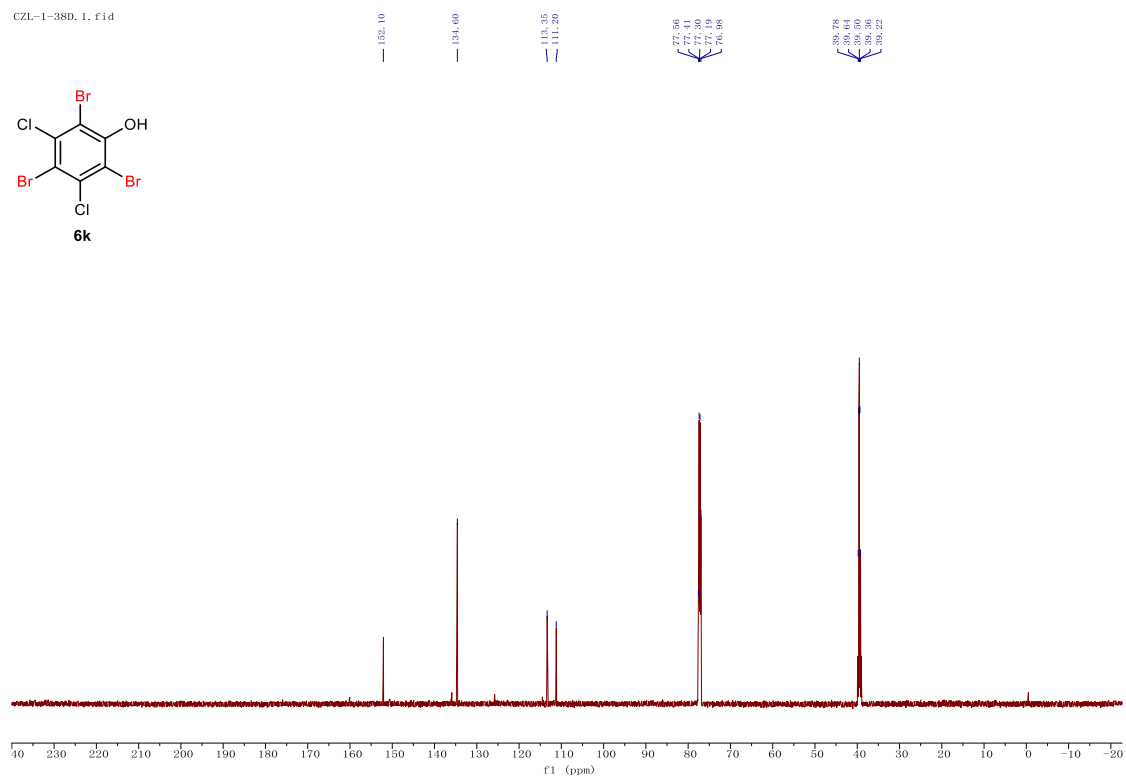

K-2-repeat80. 1. fid

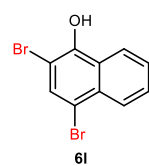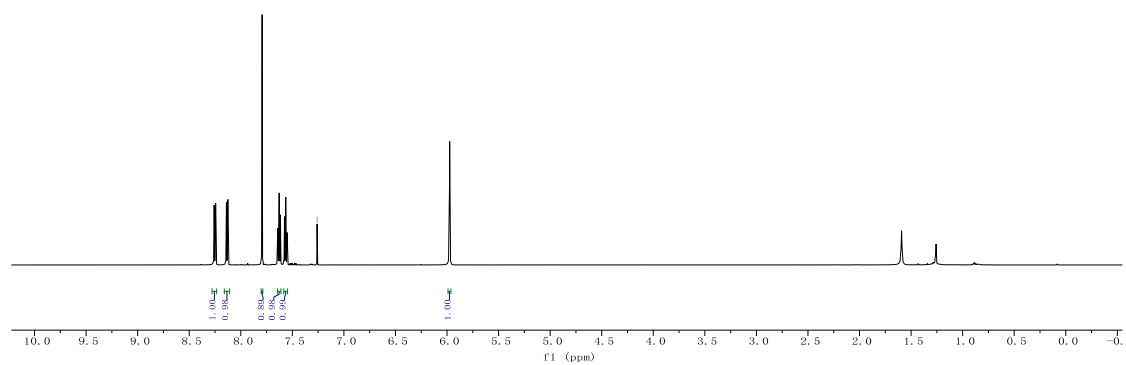

K-2-80repeat. 1. fid

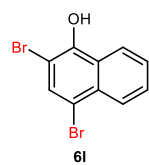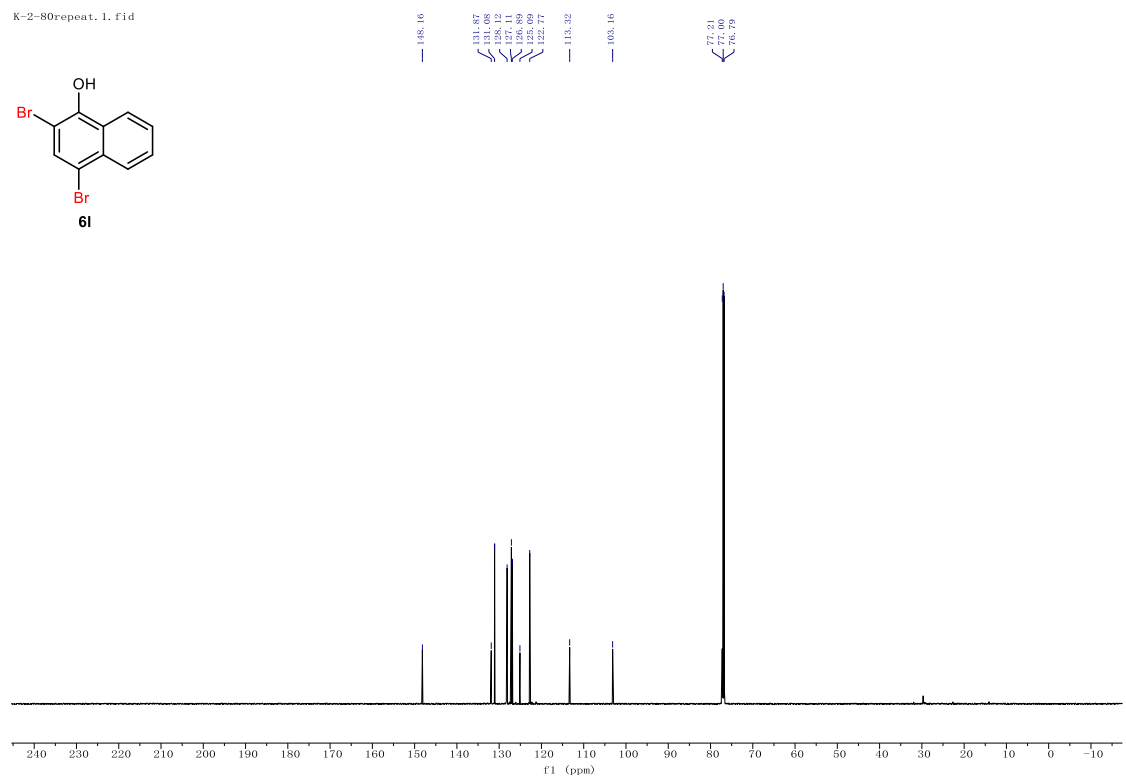

K-2-81. 1. f1d

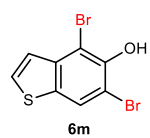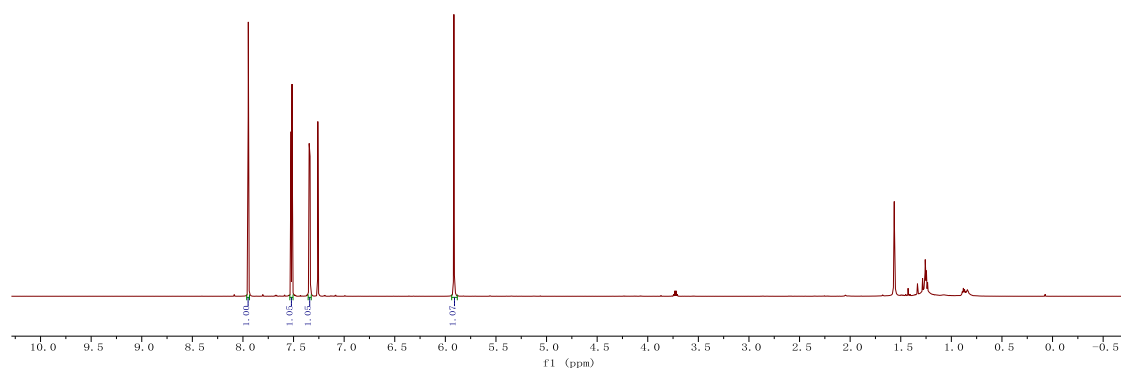

K-2-81. 2. f1d

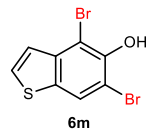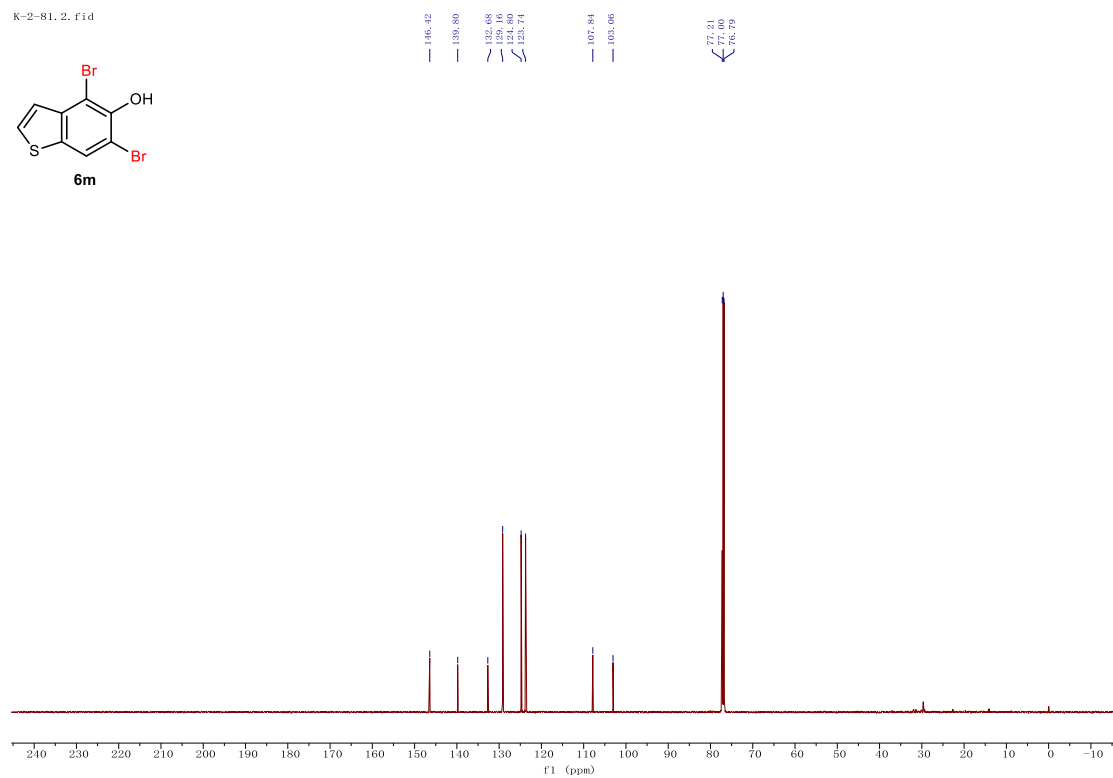

K-3-repeat-18, 1, 1, 1r

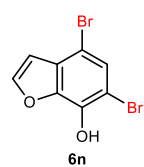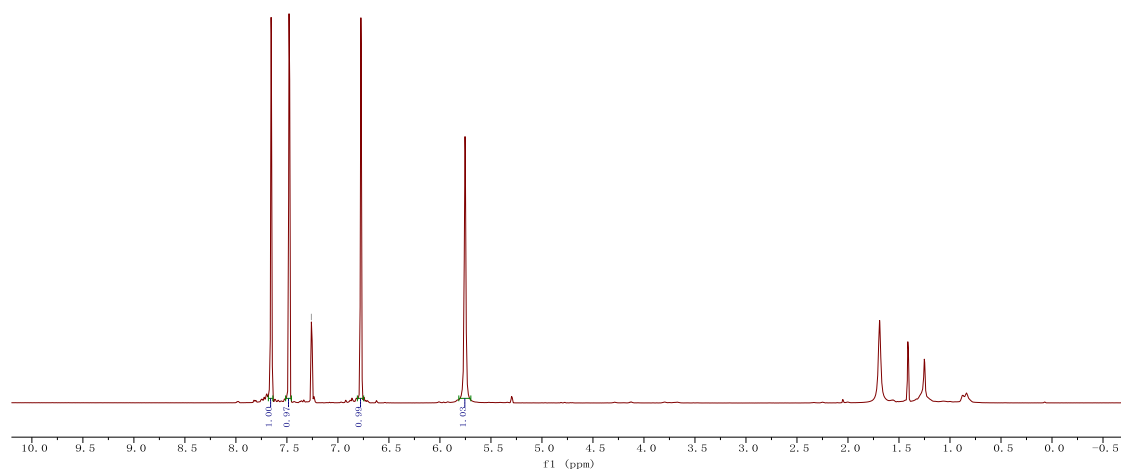

K-3-18repeat, 1, fid

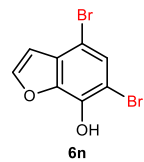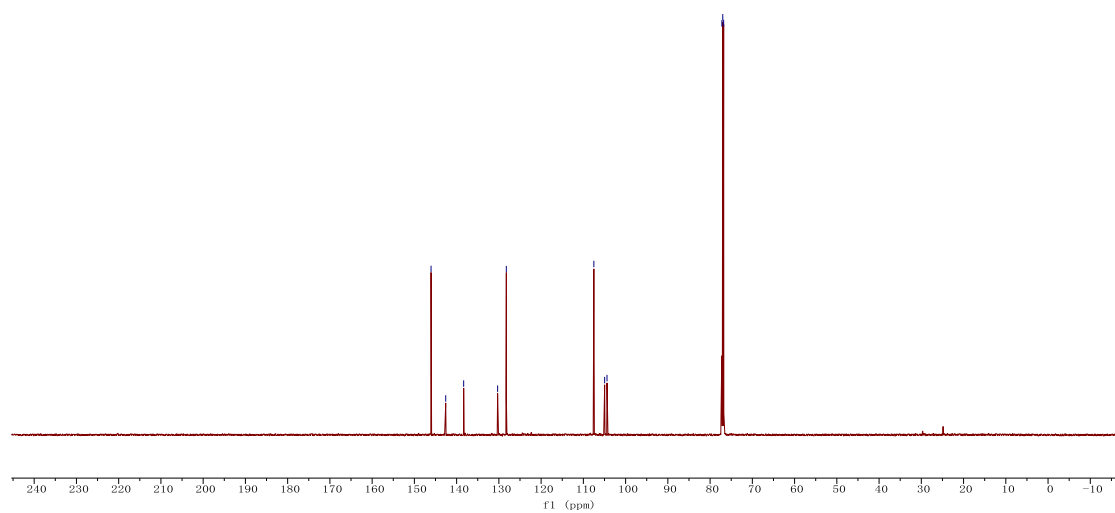



K-2-82, 1. f1d

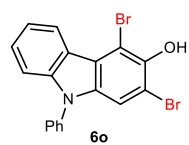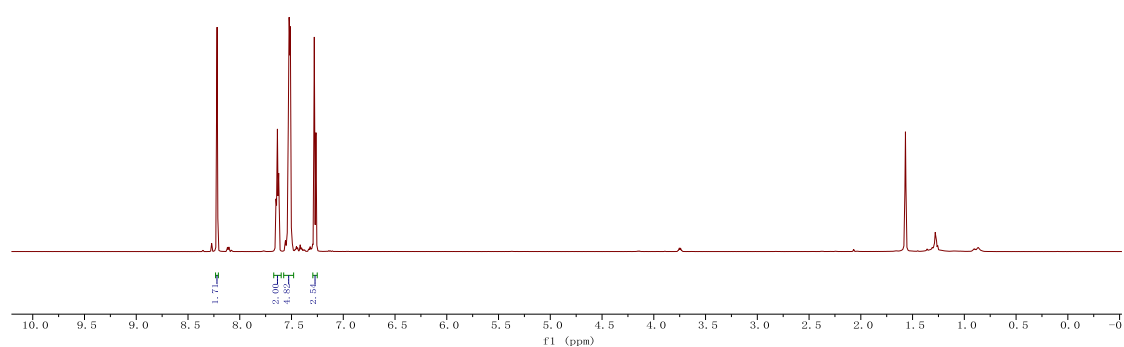

K-2-82, 2. f1d

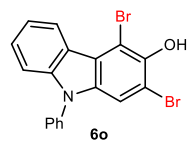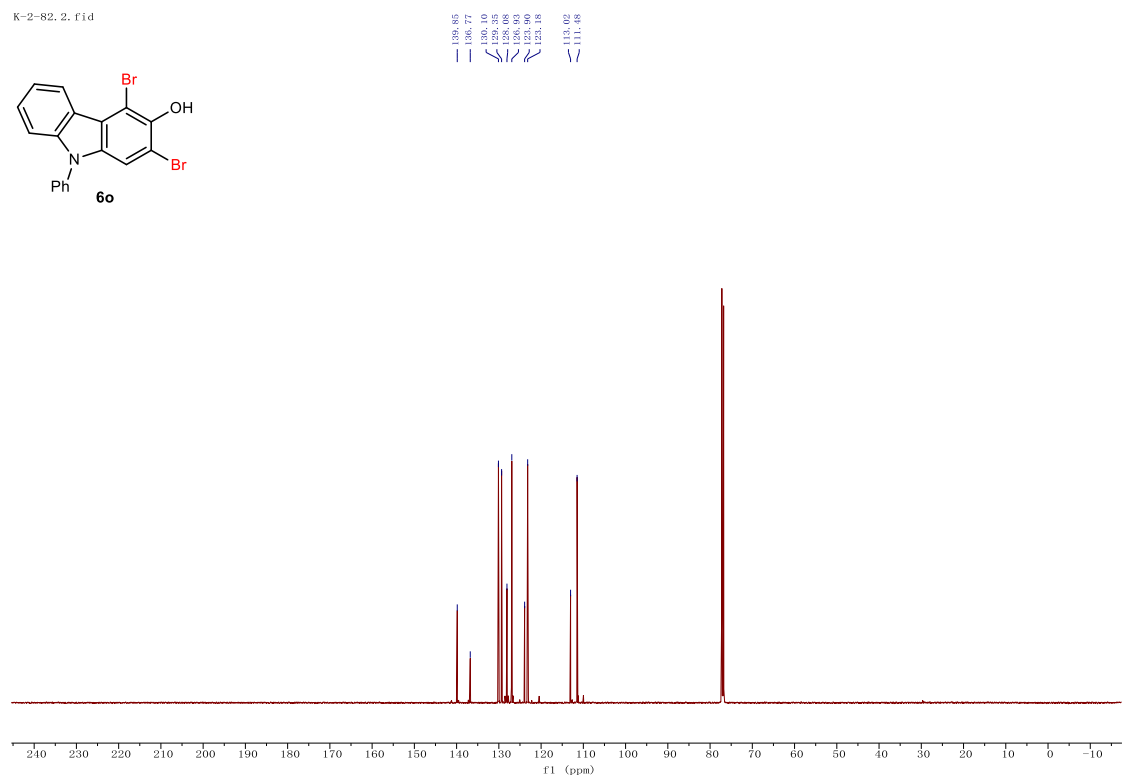

K-3-11h. 1. f1d

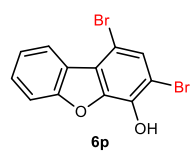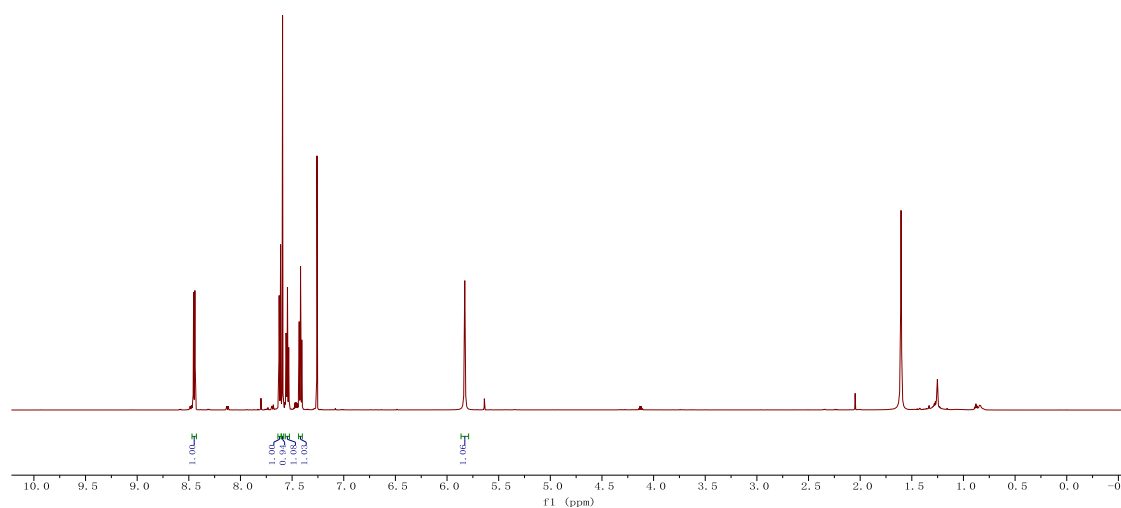

K-3-11(3). 2. f1d

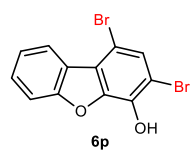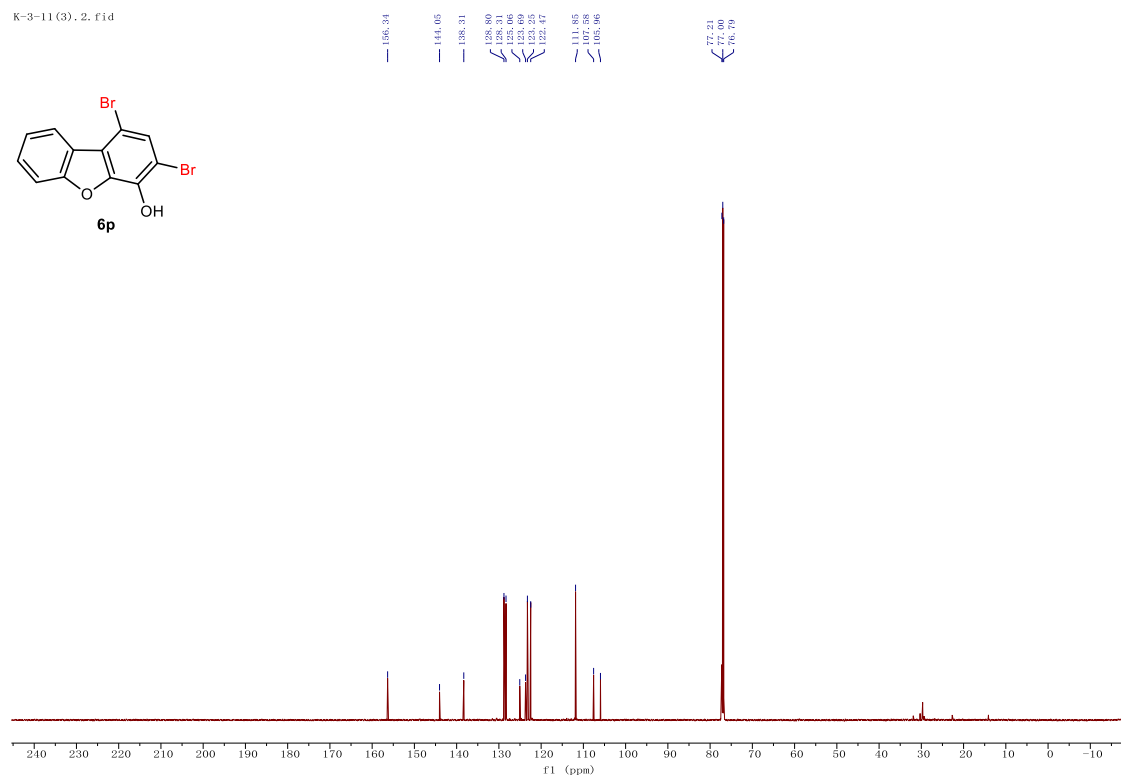

K-3-2, 1, fid

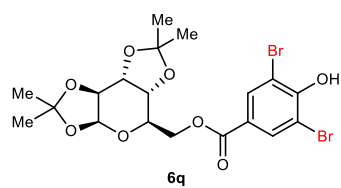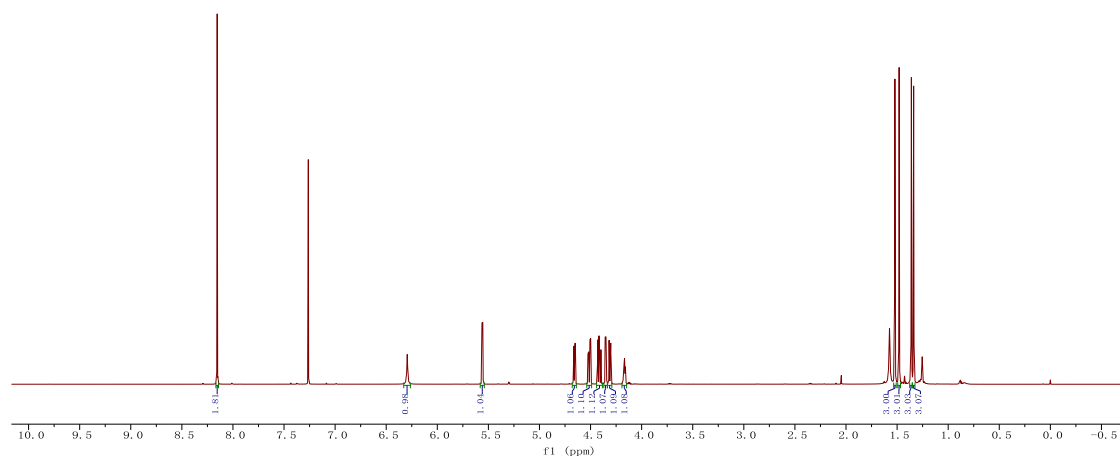

K-3-2, 2, fid

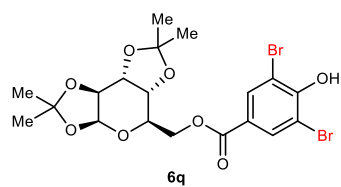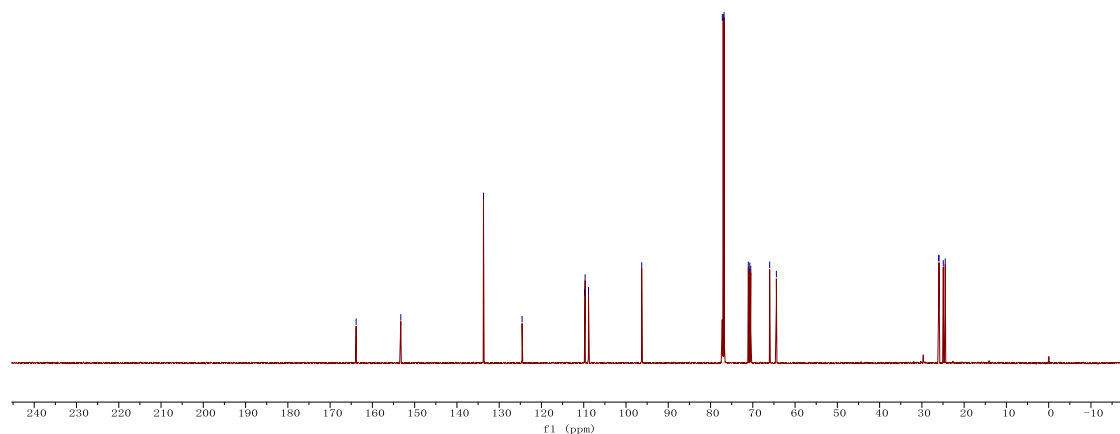

K-3-3(1). 1. f1.d

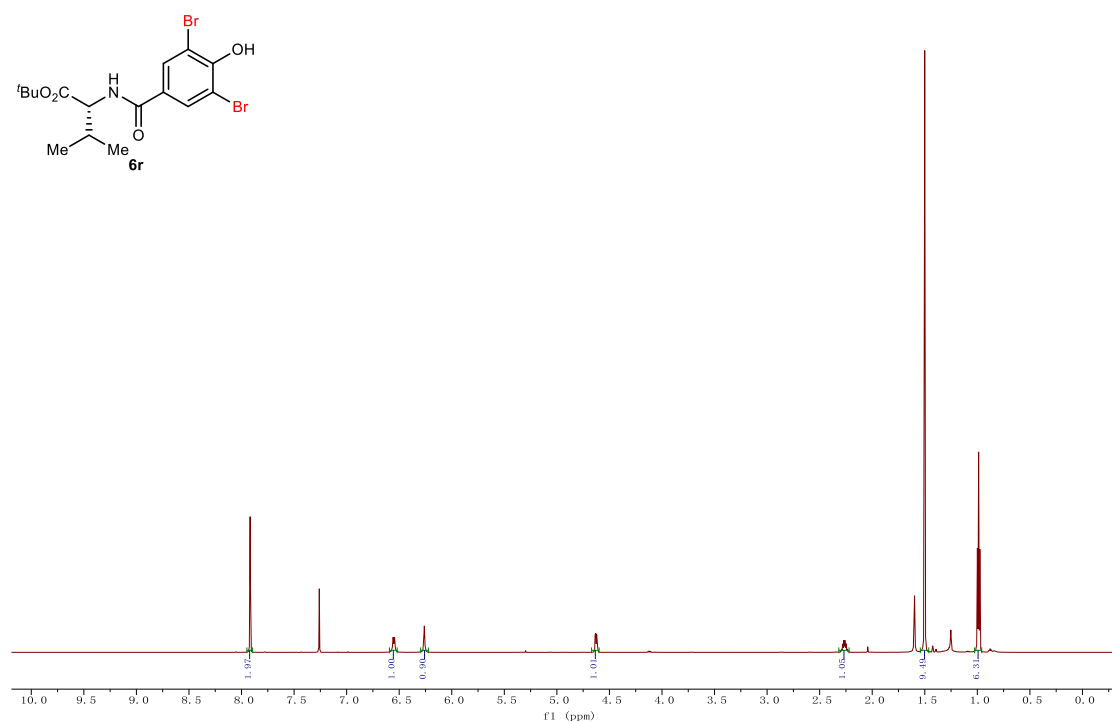

K-3-3(1). 2. f1.d

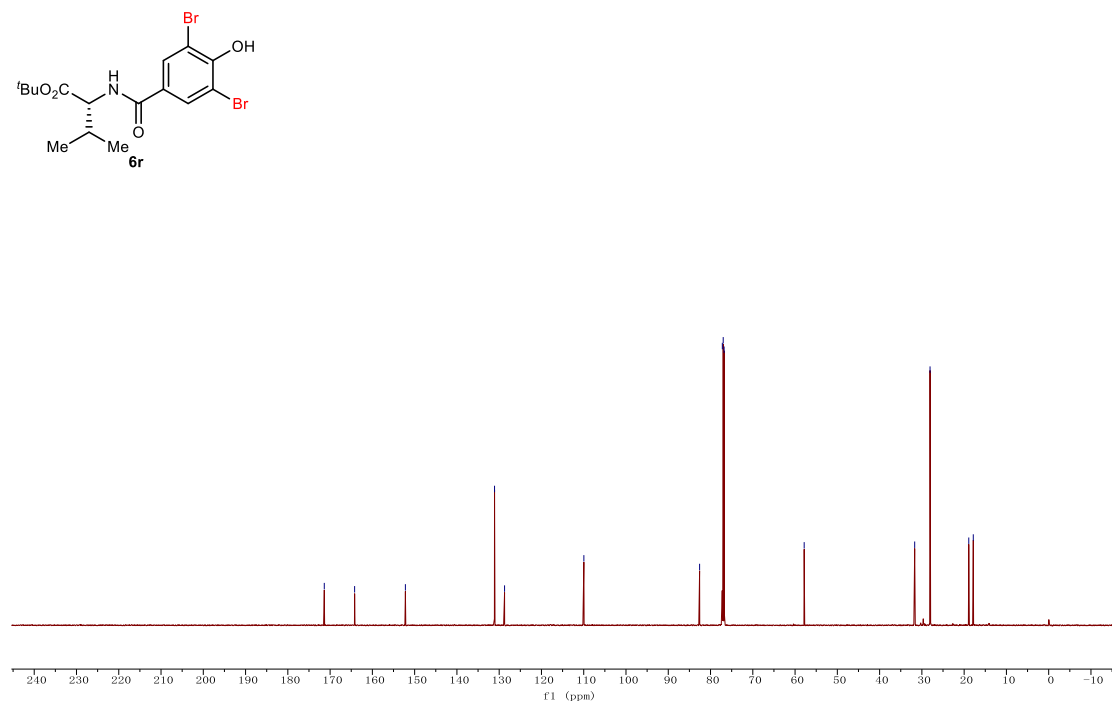

K-3-4. 1. fid

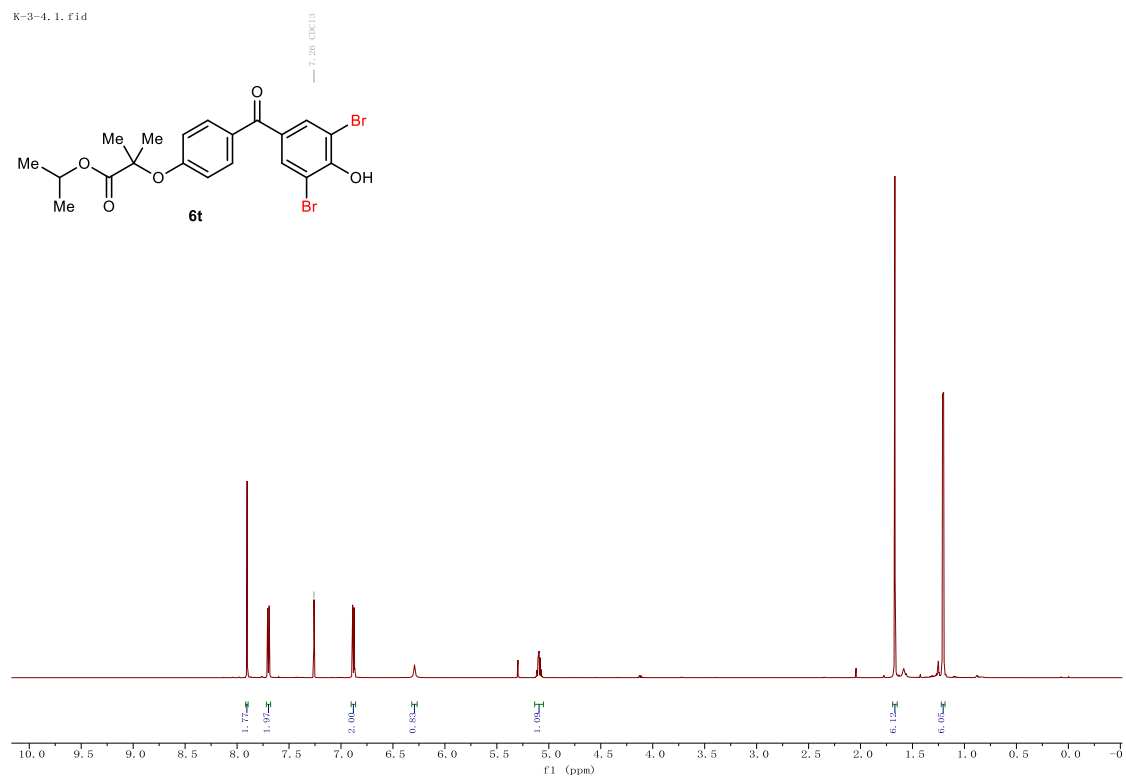

K-3-4. 2. fid

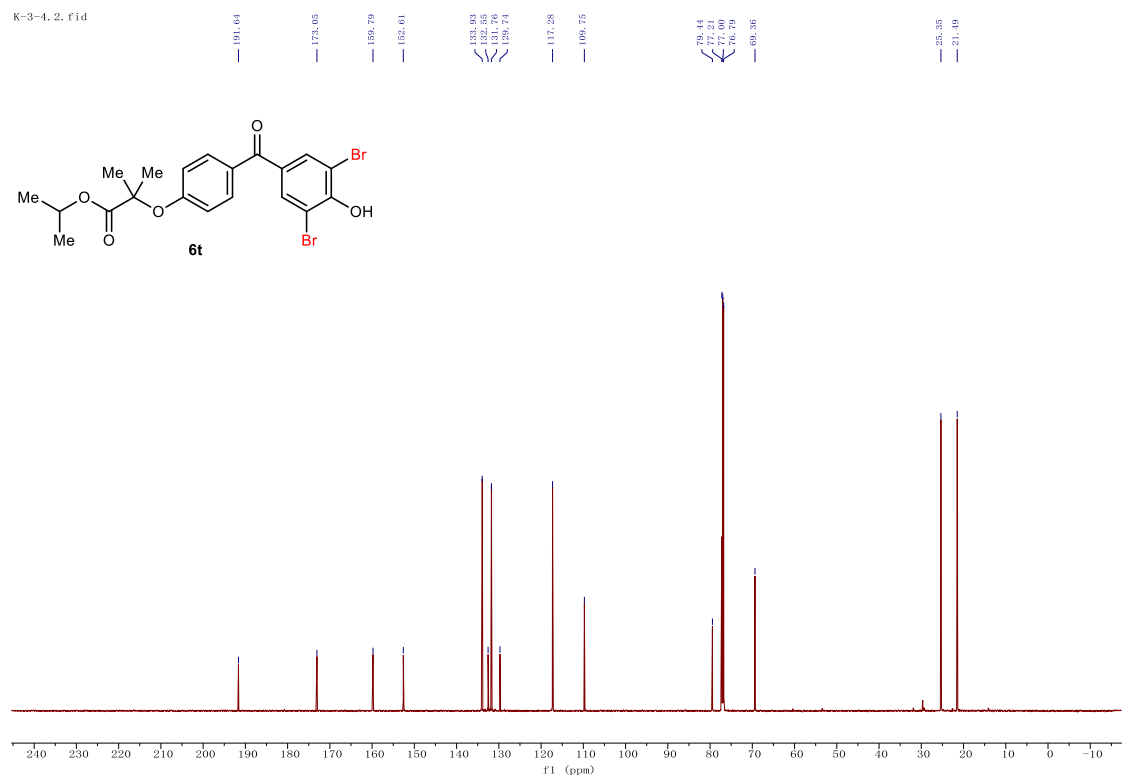

K-3-5(1). 1. f1d

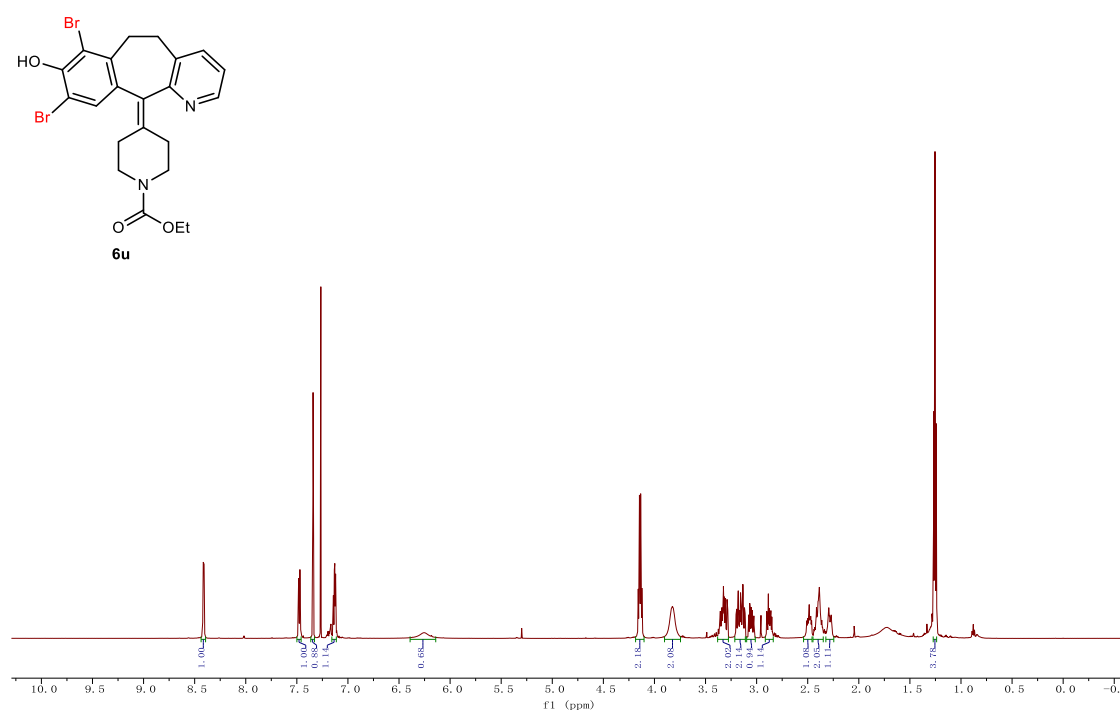

K-3-5(1). 2. f1d

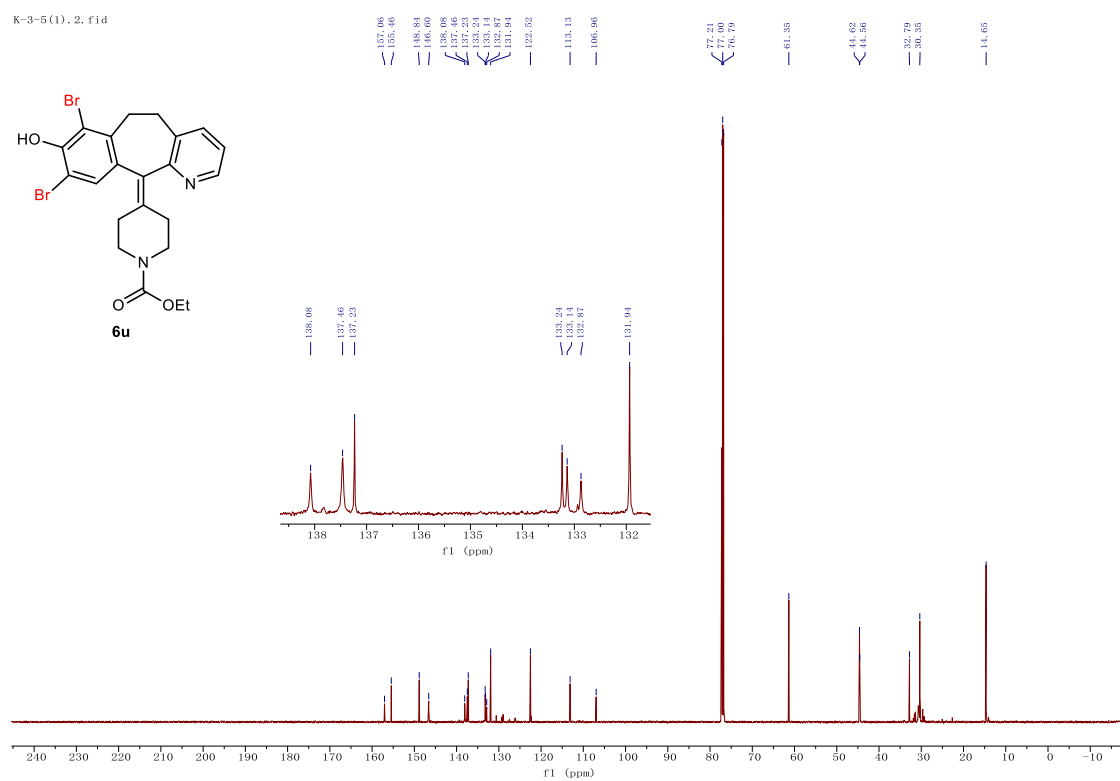

K-3-46, 1, f1d

7.28 (2H, s)

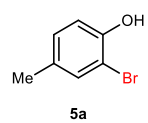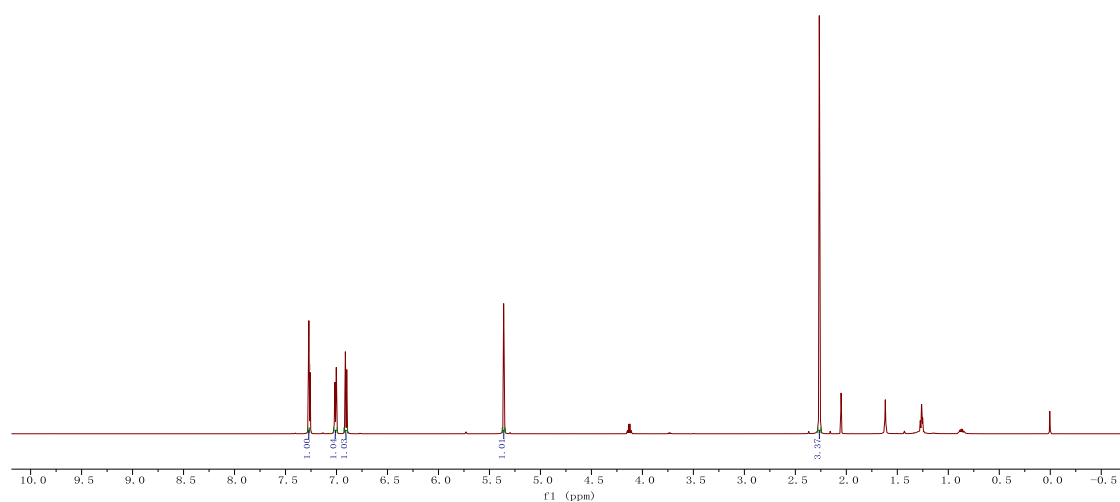

K-3-46, 2, f1d

149.98

132.10  
131.40  
129.71115.71  
109.7977.51  
77.00  
76.79

20.17

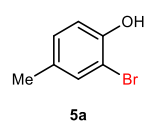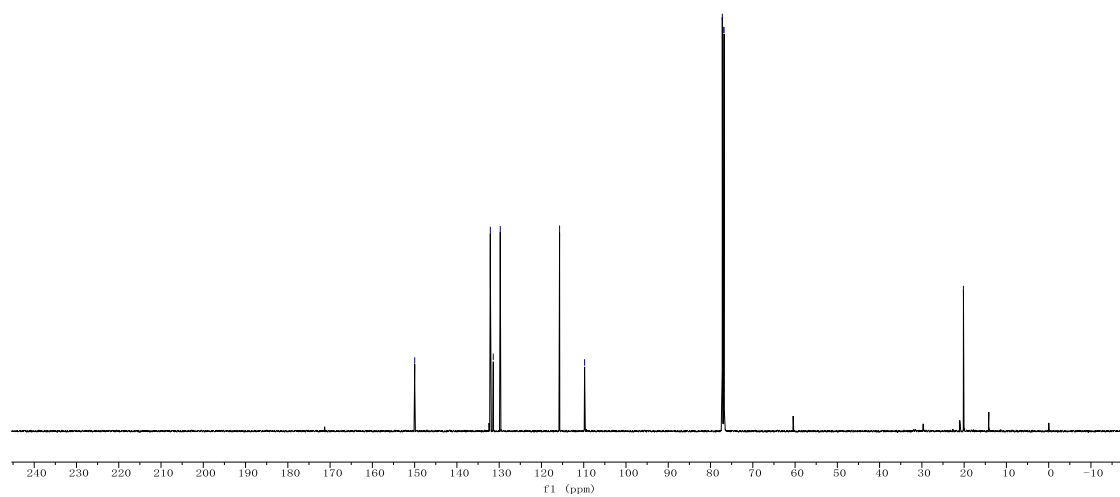

K-3-28, 1, f1d

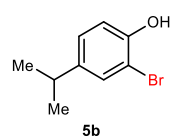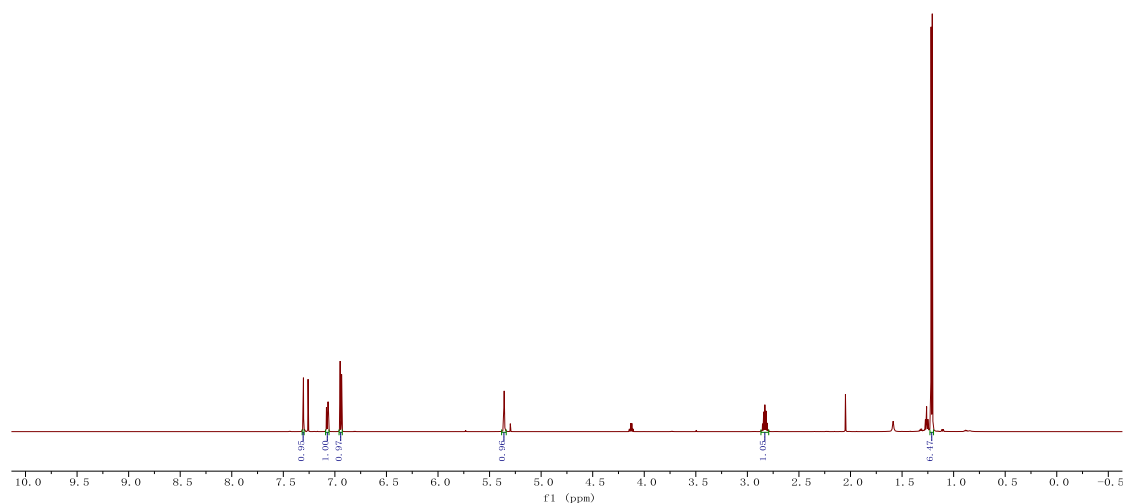

K-3-28repeat, 2, f1d

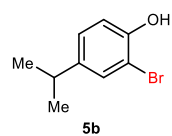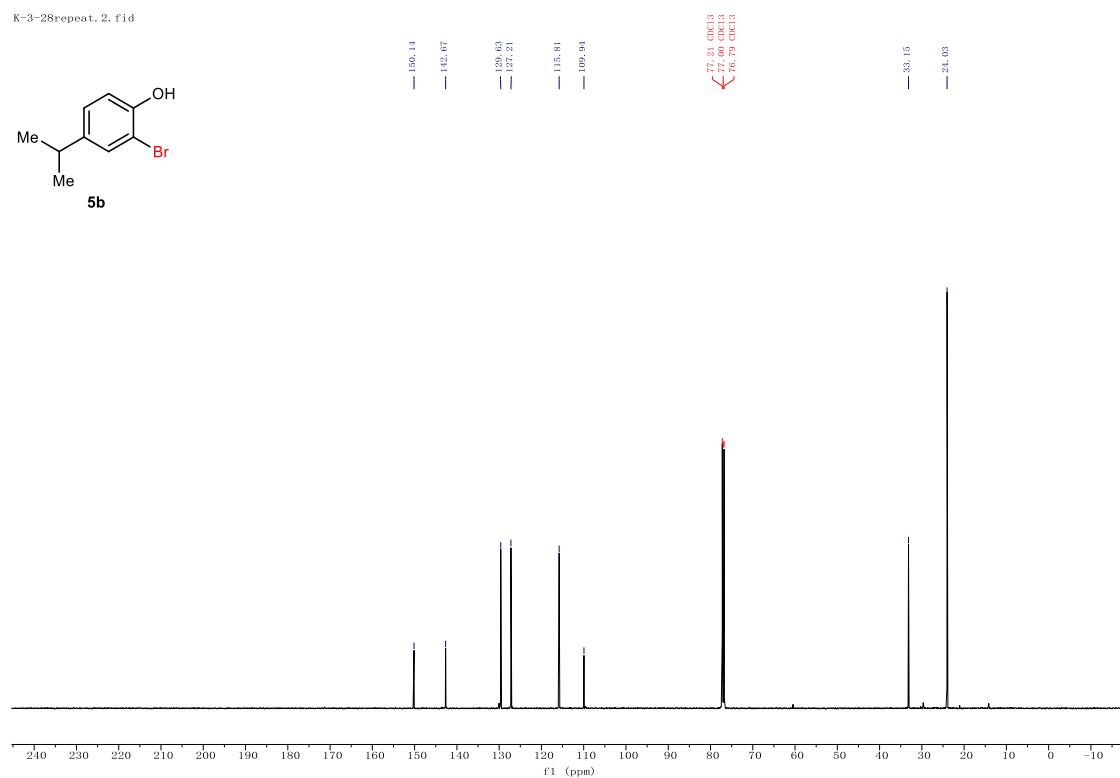



K-3-13.3.fid

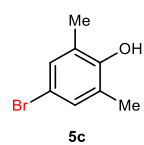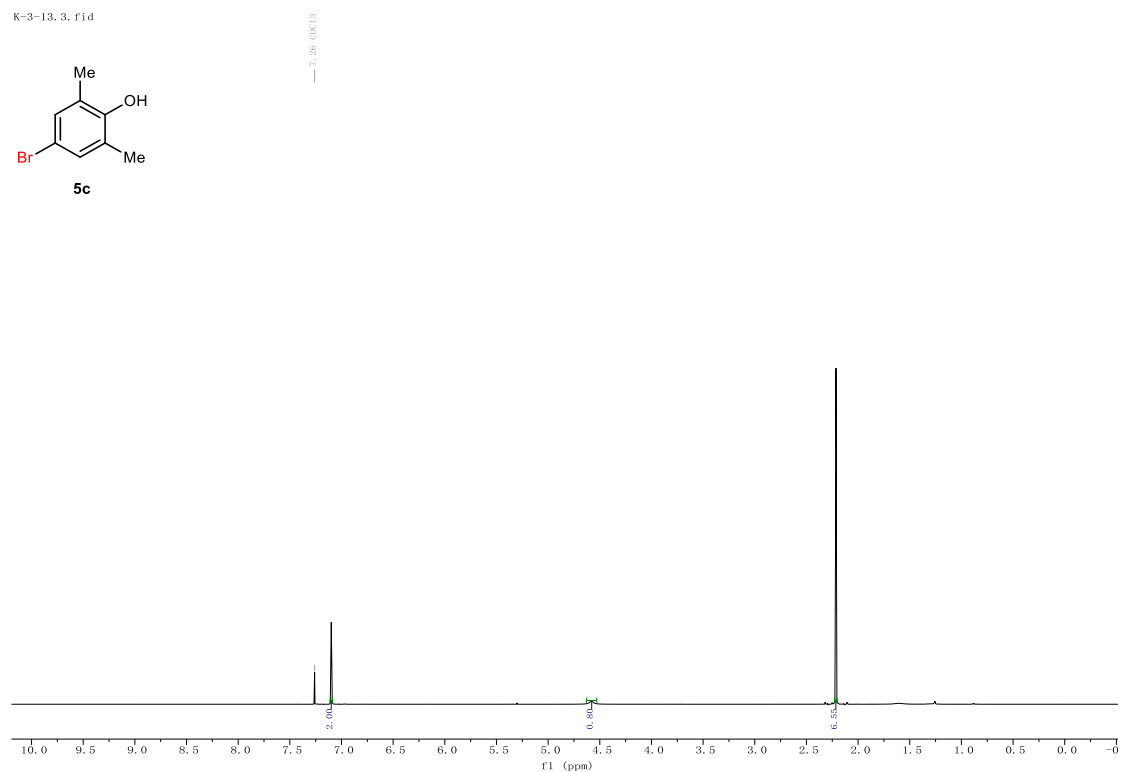

K-3-13.2.fid

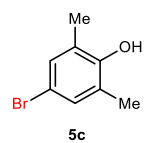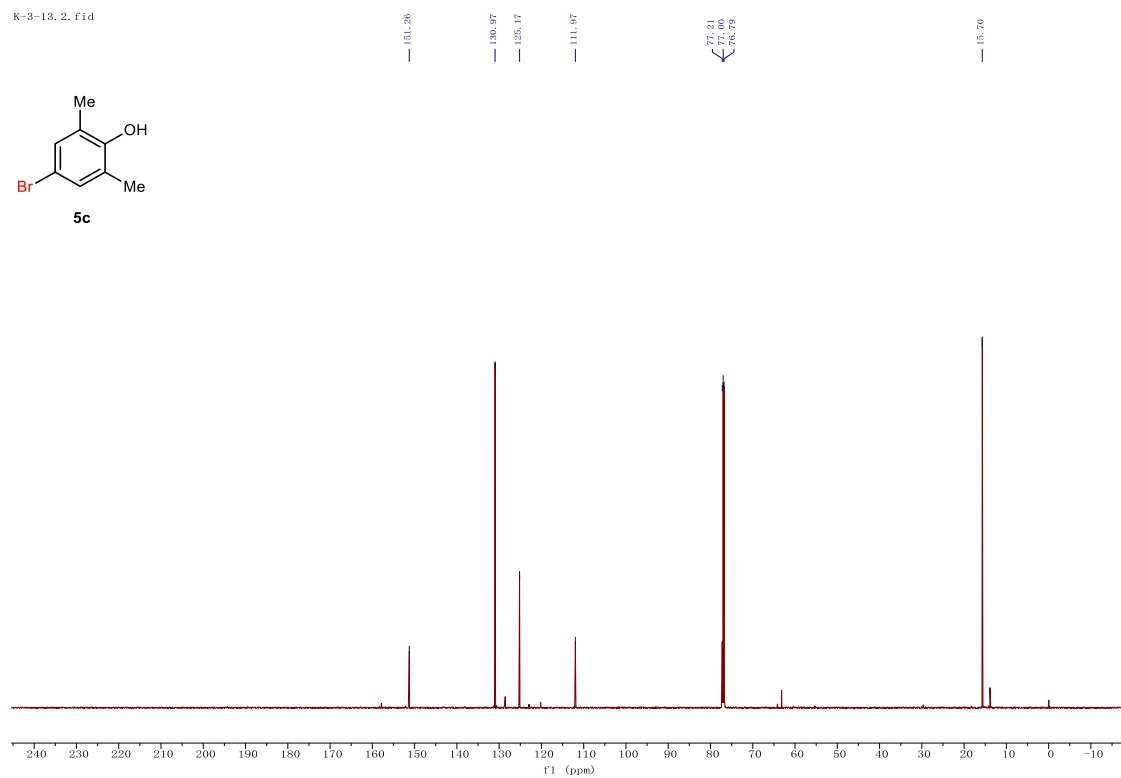

K-3-27. 2. fid

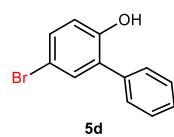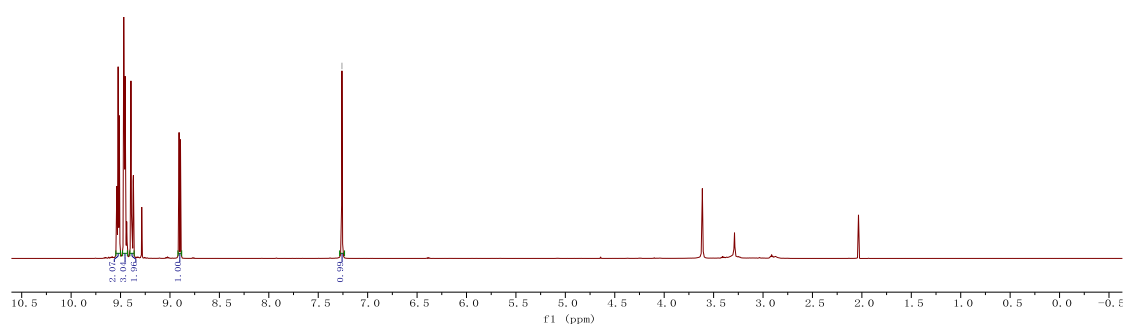

K-3-27. 3. fid

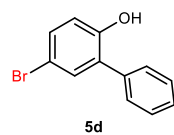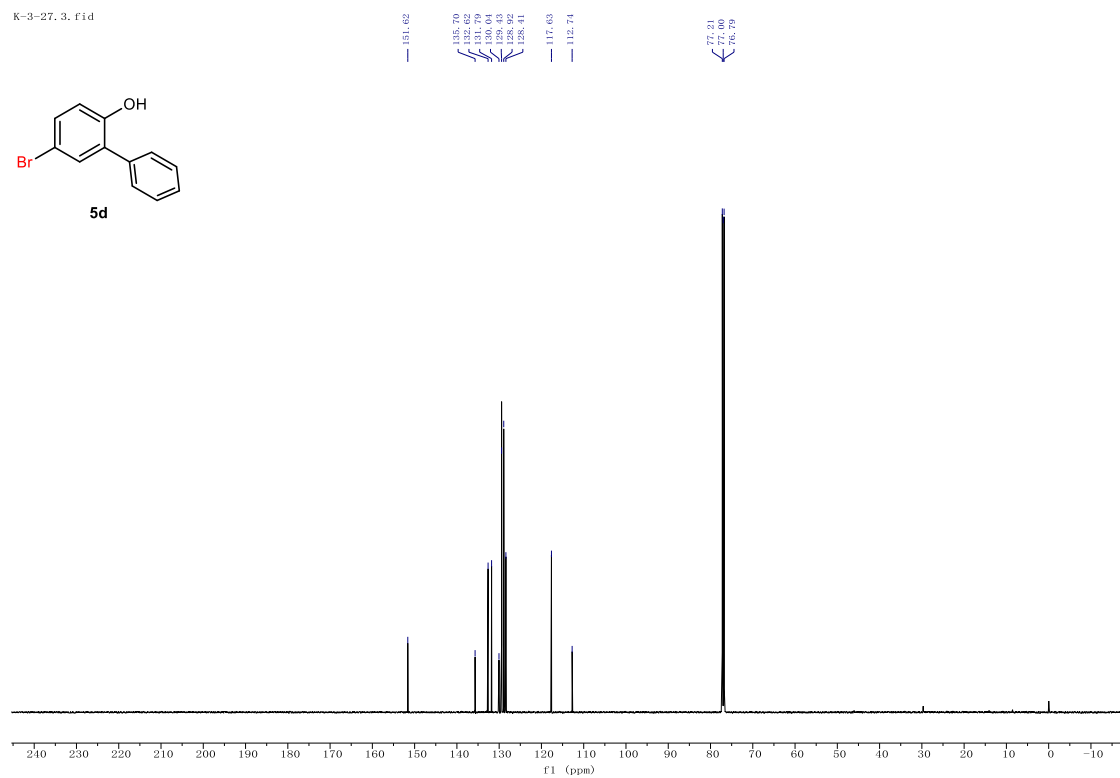

K-3-21, 2, fid

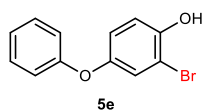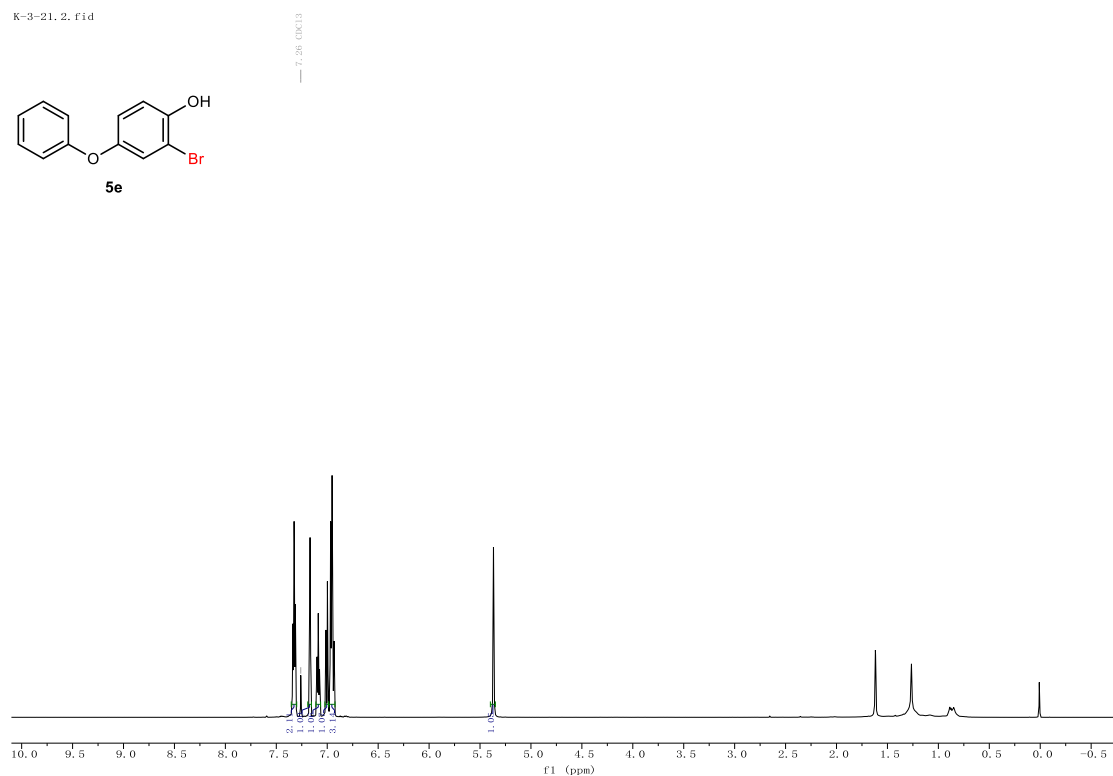

K-3-21.3.fid

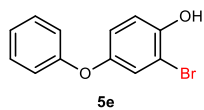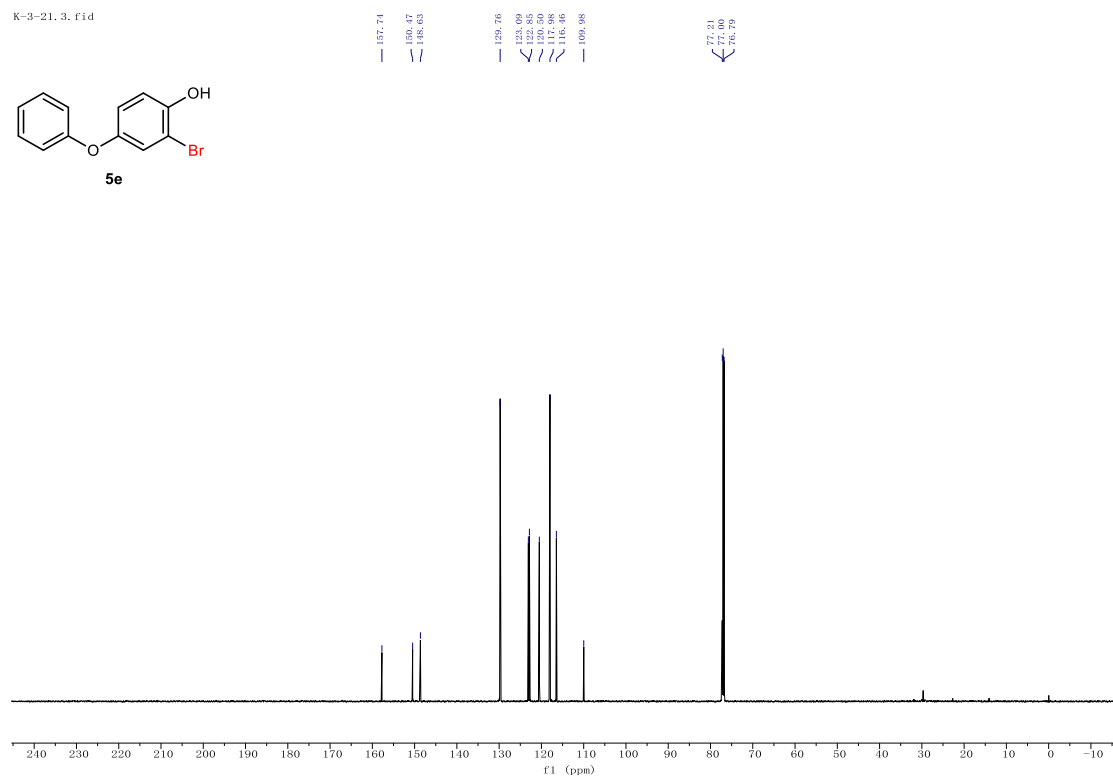

K-3-26, 1, fid

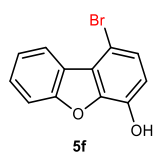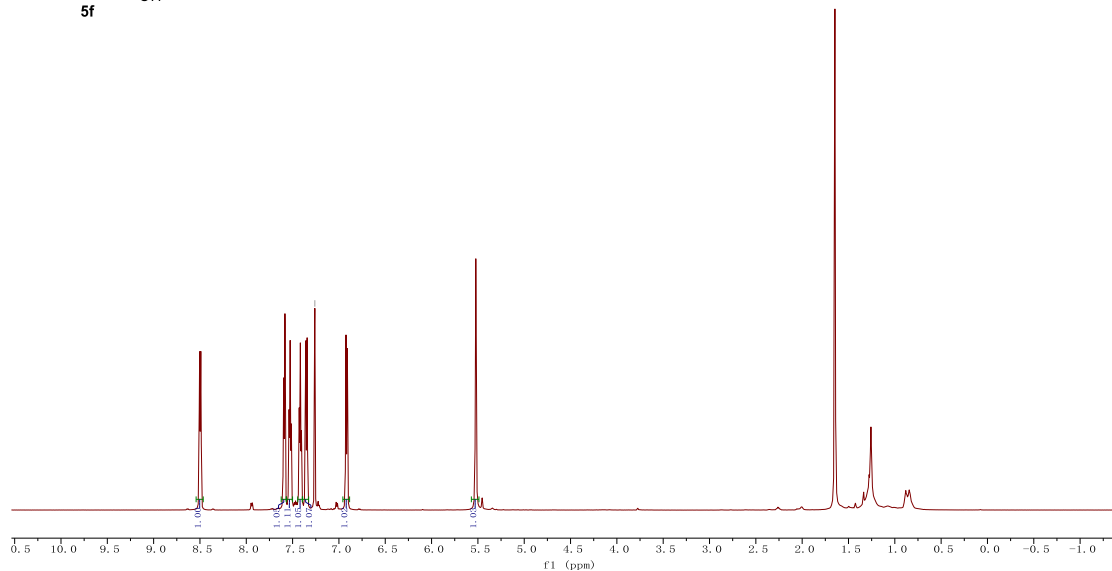

K-3-26.2.fid

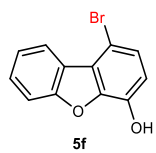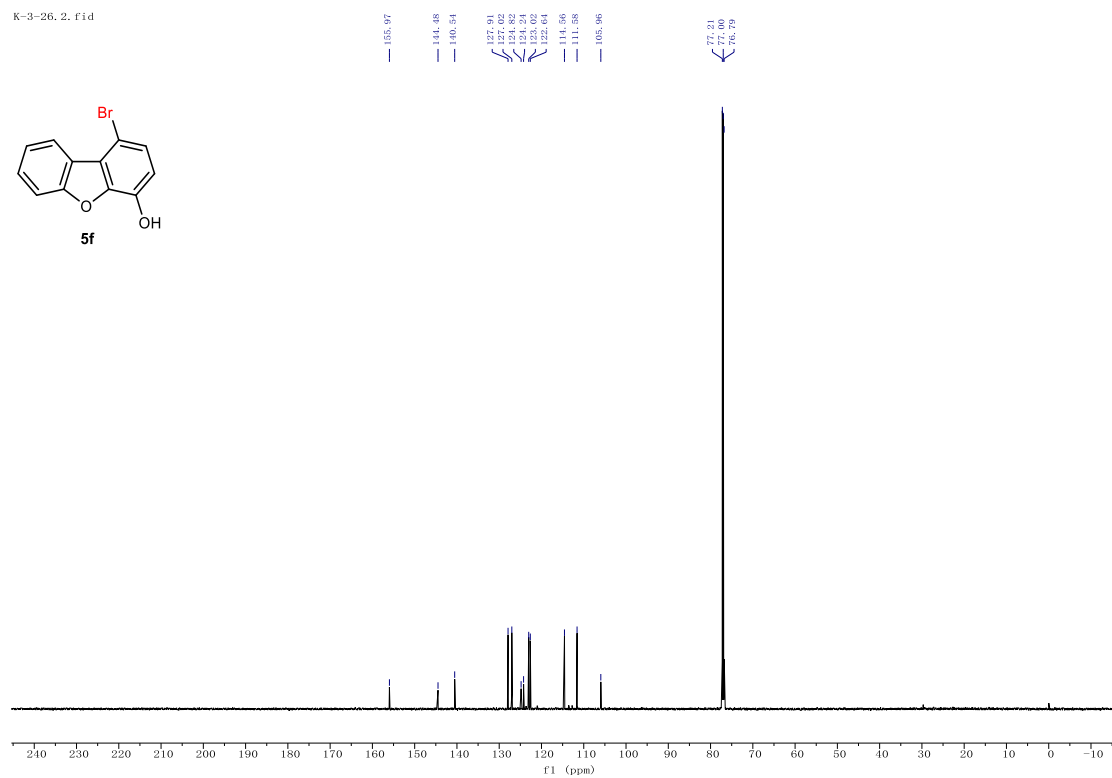

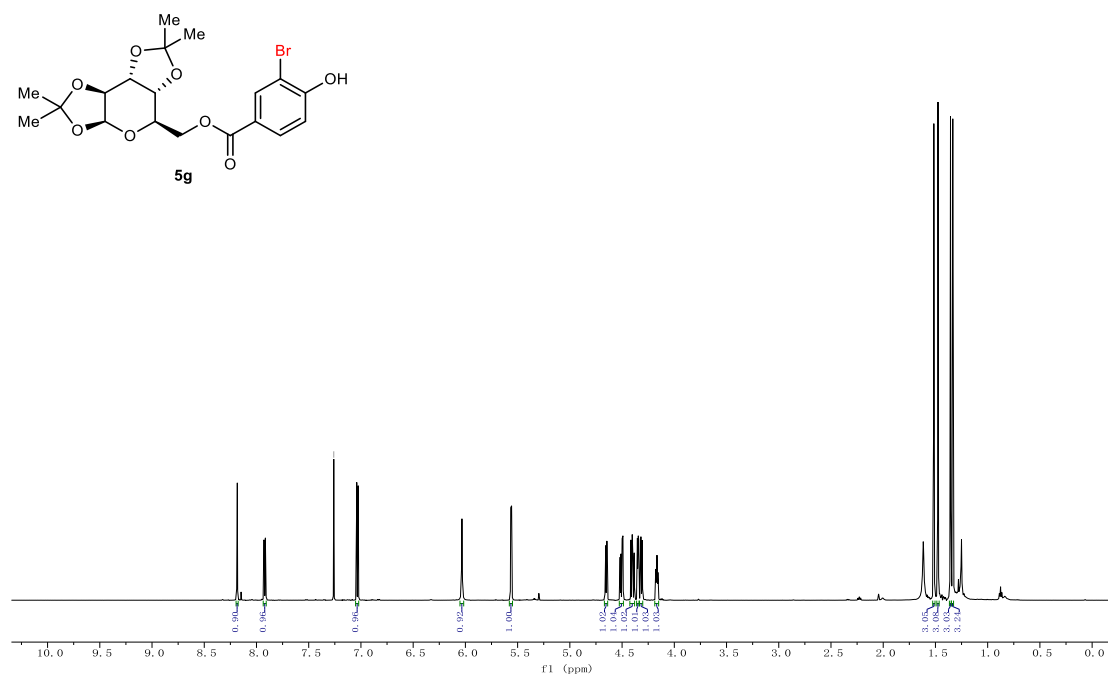

— 164.97

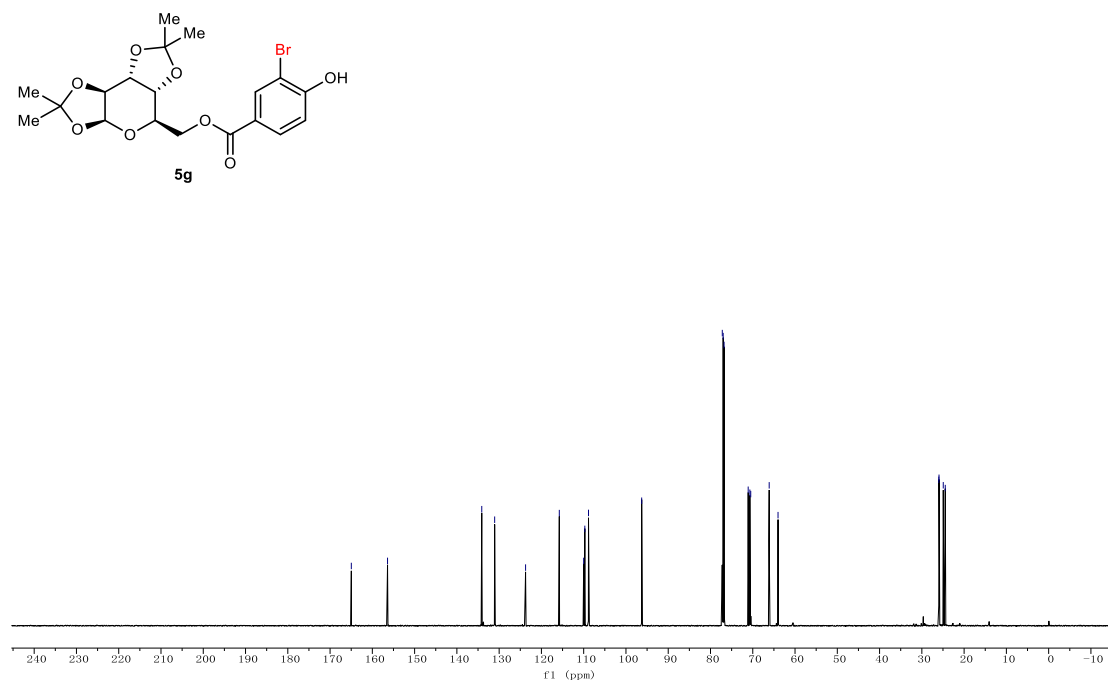

K-3-22. 1. fid

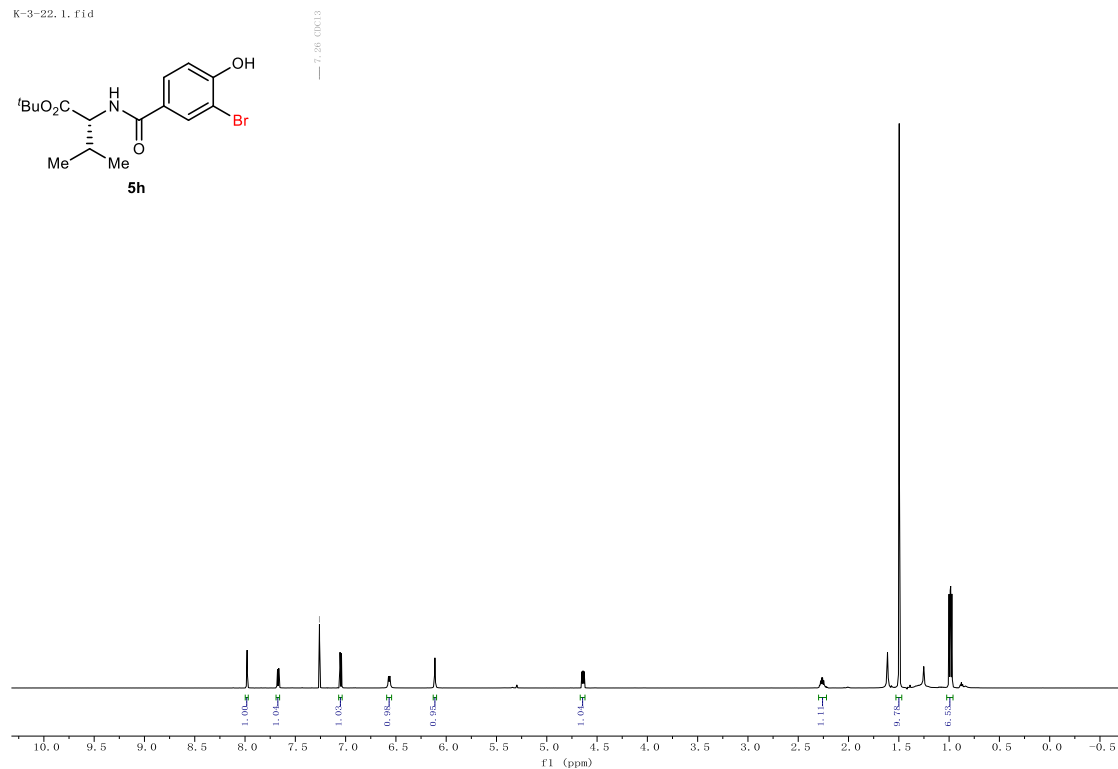

K-3-22(2) repeat. 1. fid

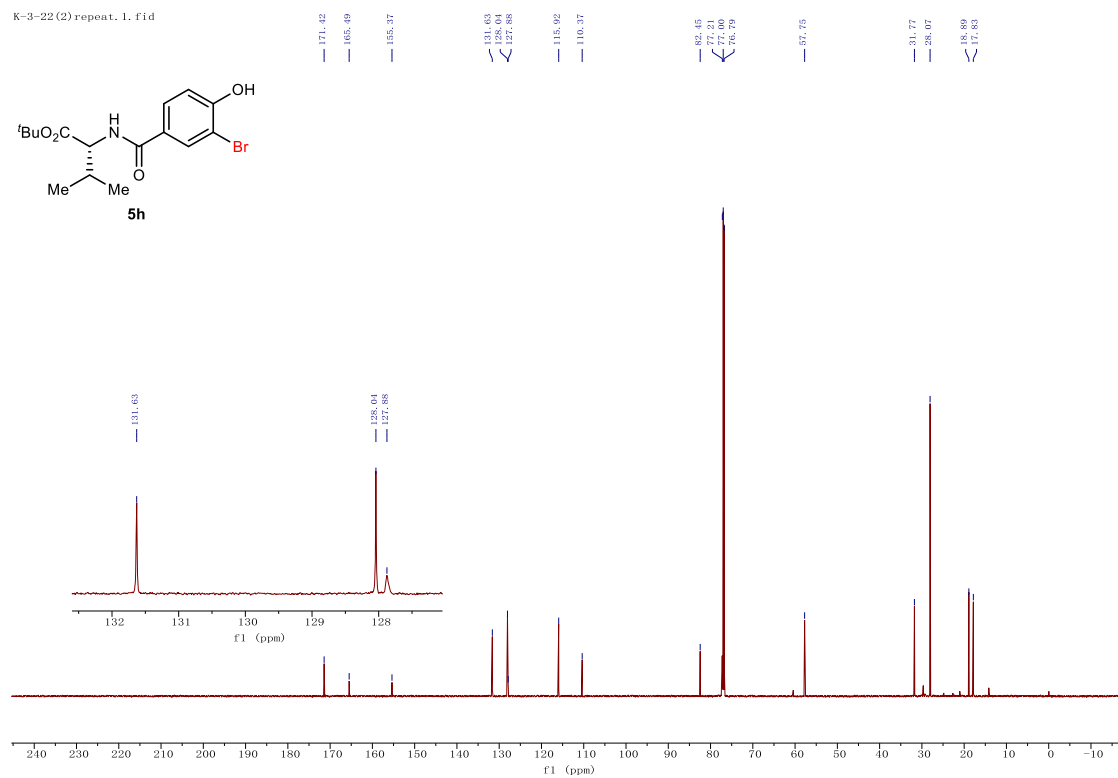

K-3-25. 1. fid

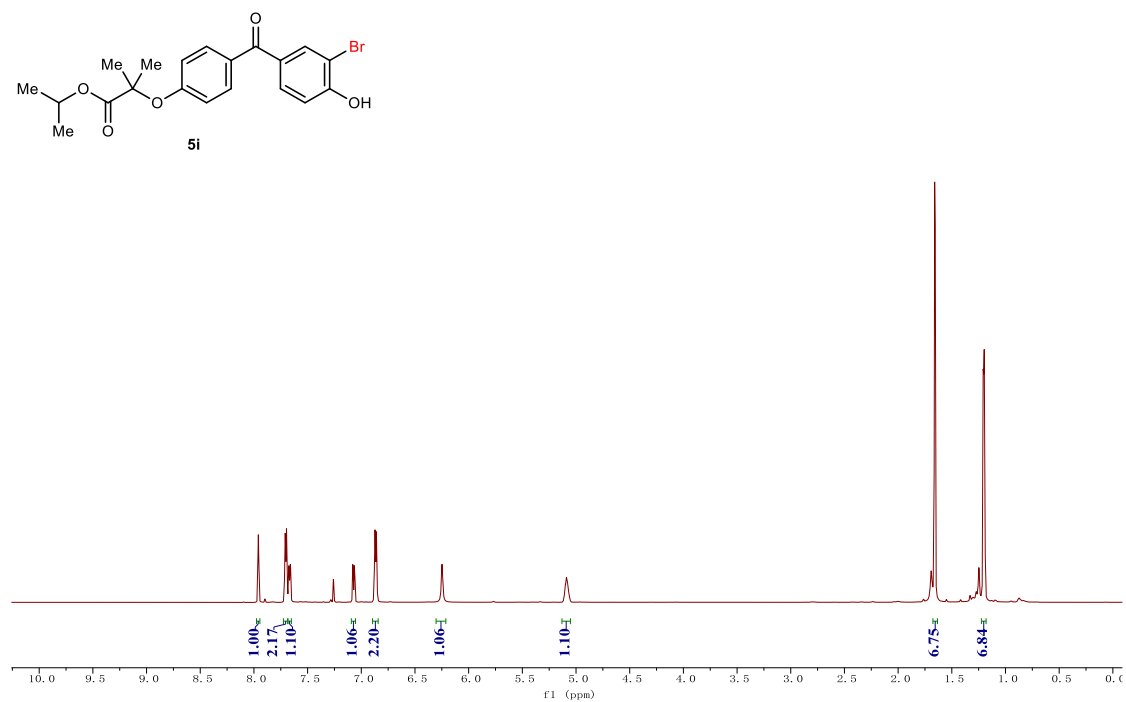

K-3-25. 2. fid

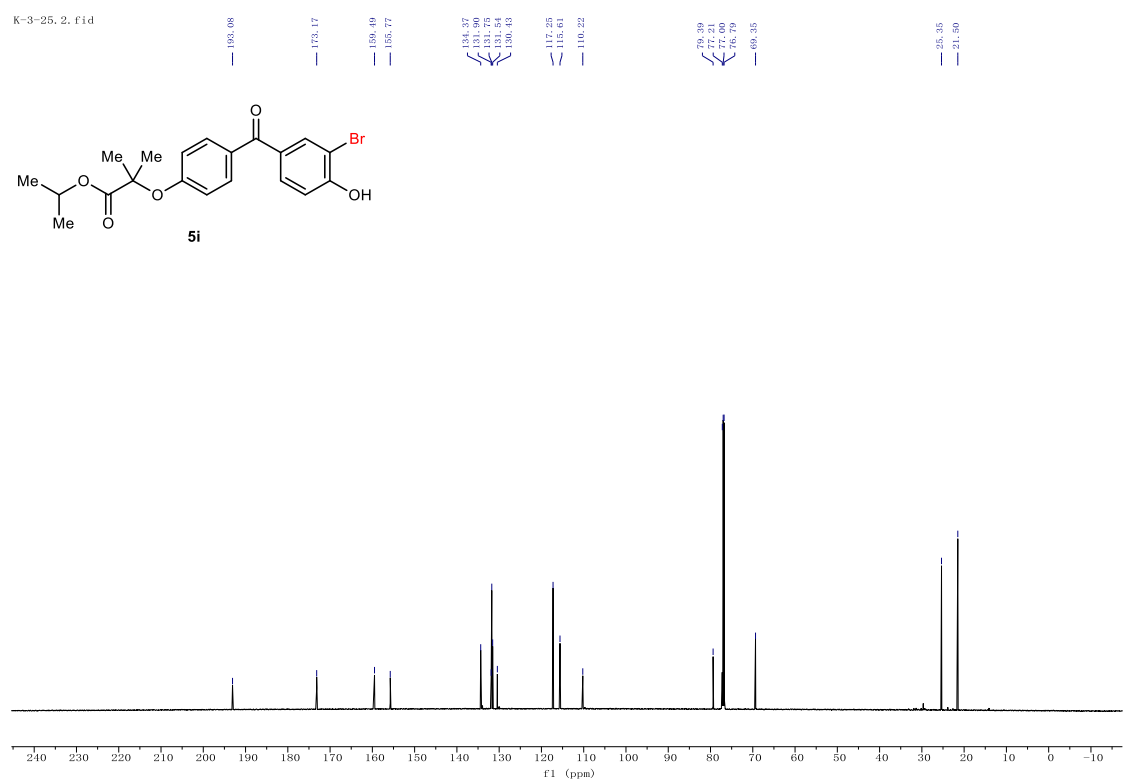

K-3-48CH3, 1, f1d

7.26 CDCl3

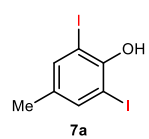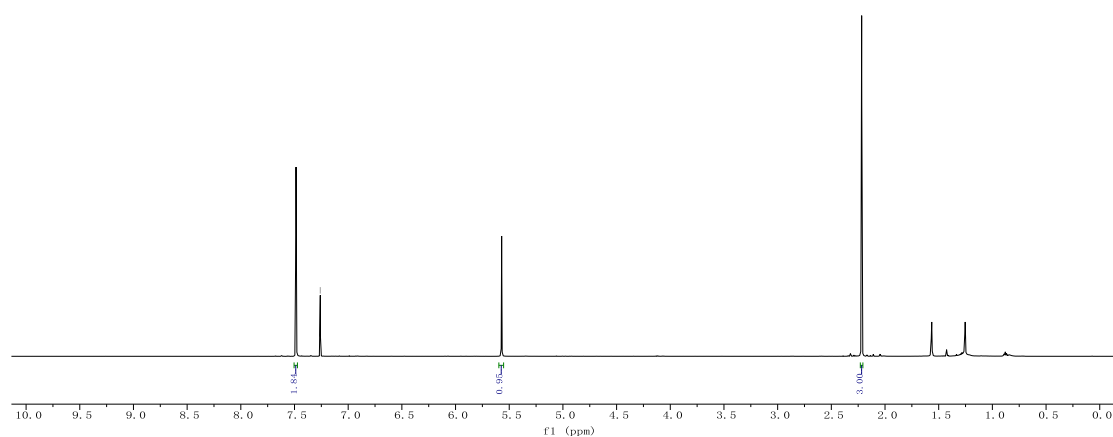

K-3-31.2, f1d

151.35

139.58

133.86

81.80  
81.59  
77.00  
76.79

19.38

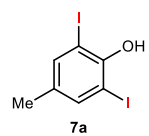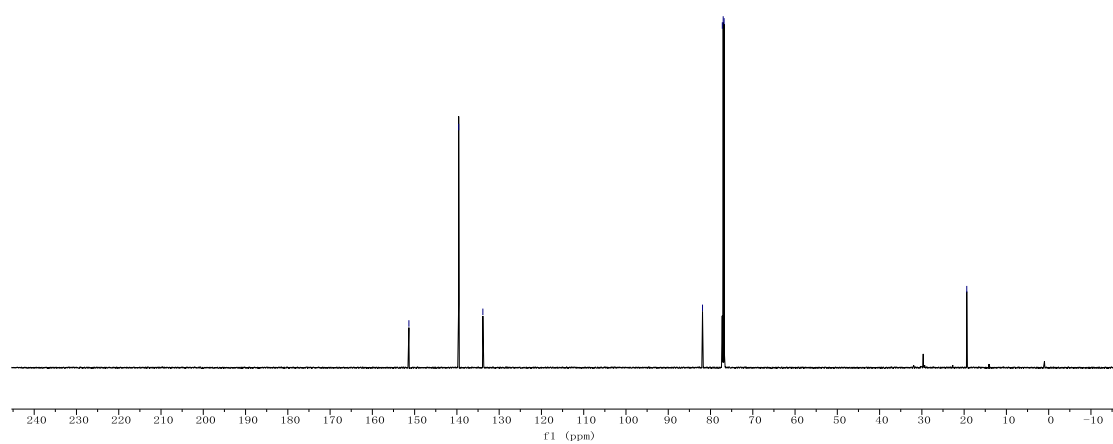



K-3-30(1).1.fid

7.28 CDCl3

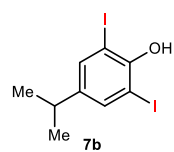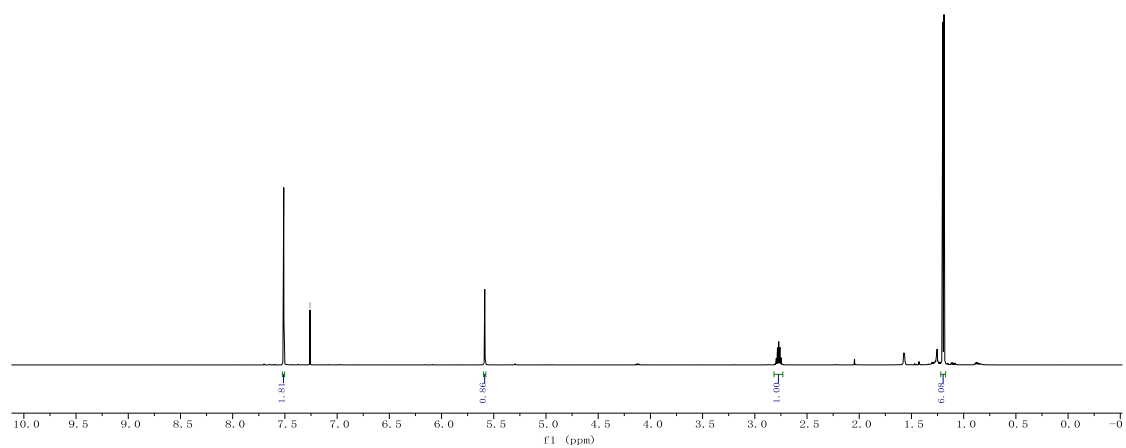

K-3-30(1).2.fid

151.48

145.03

137.26

83.15

77.00

76.79

32.67

23.93

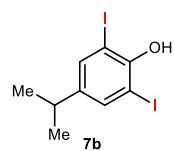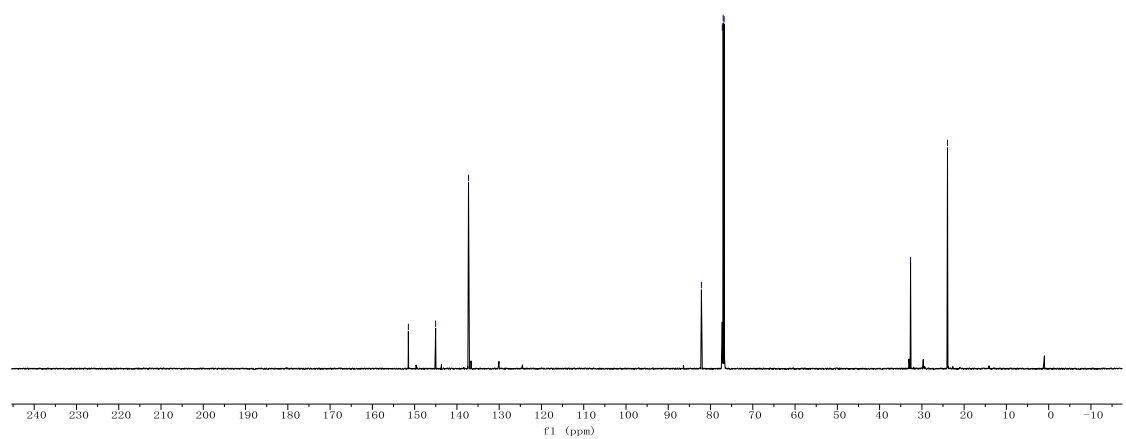

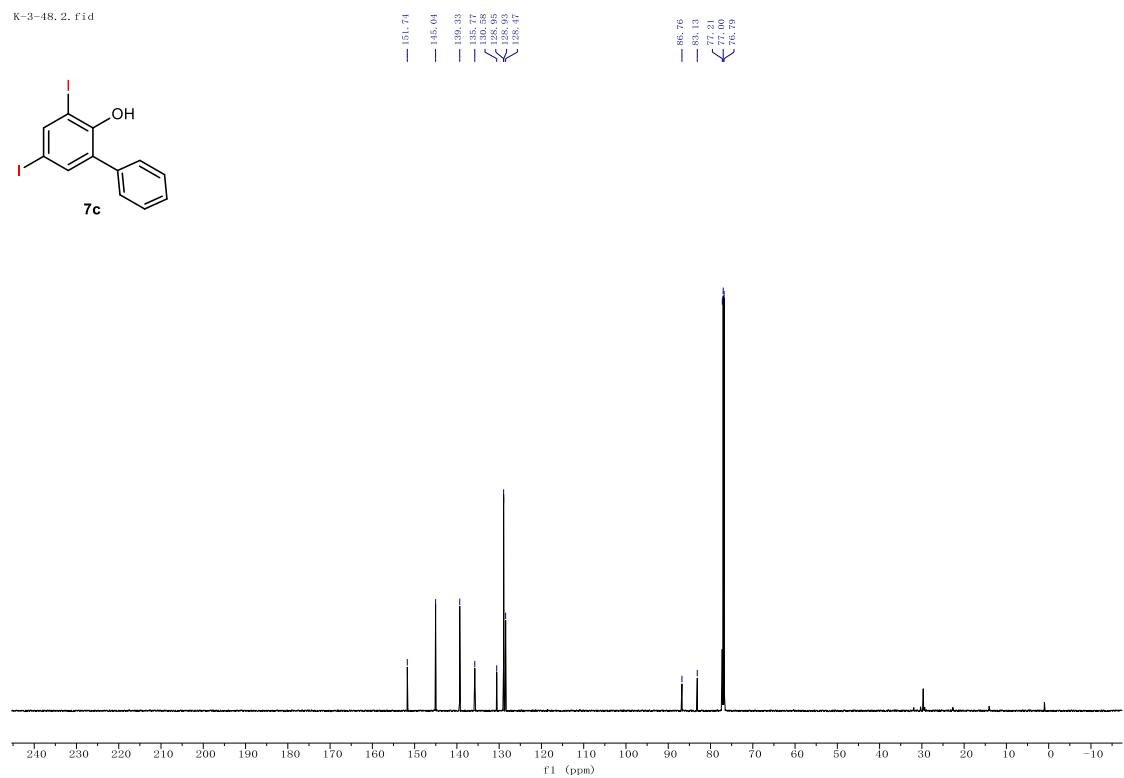

K-3-32. 1. fid

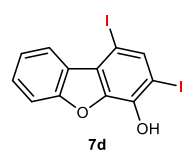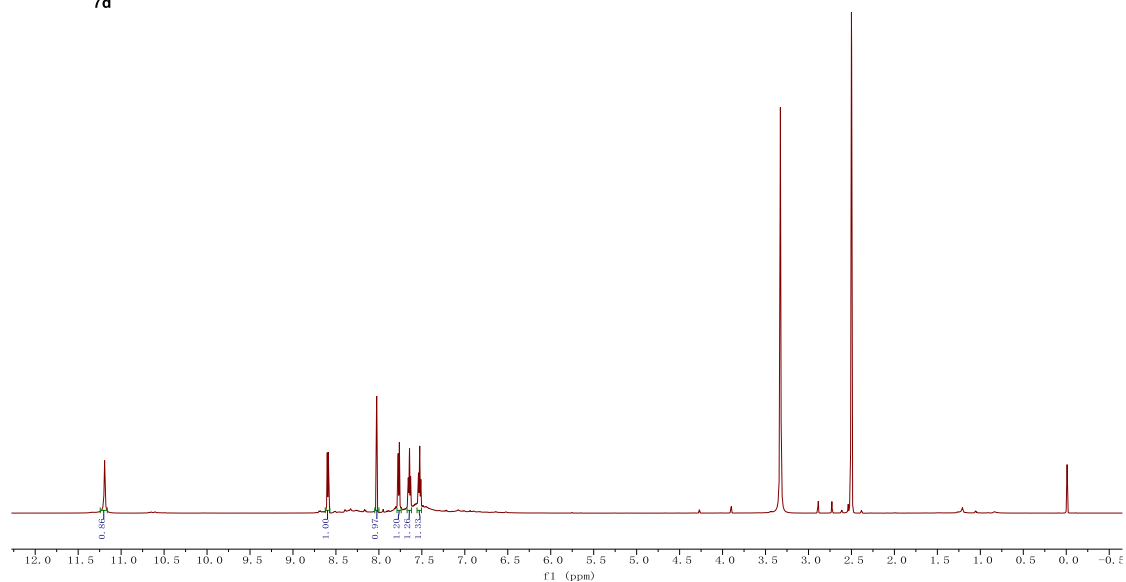

K-3-32. 2. fid

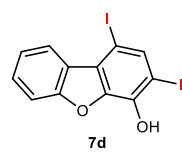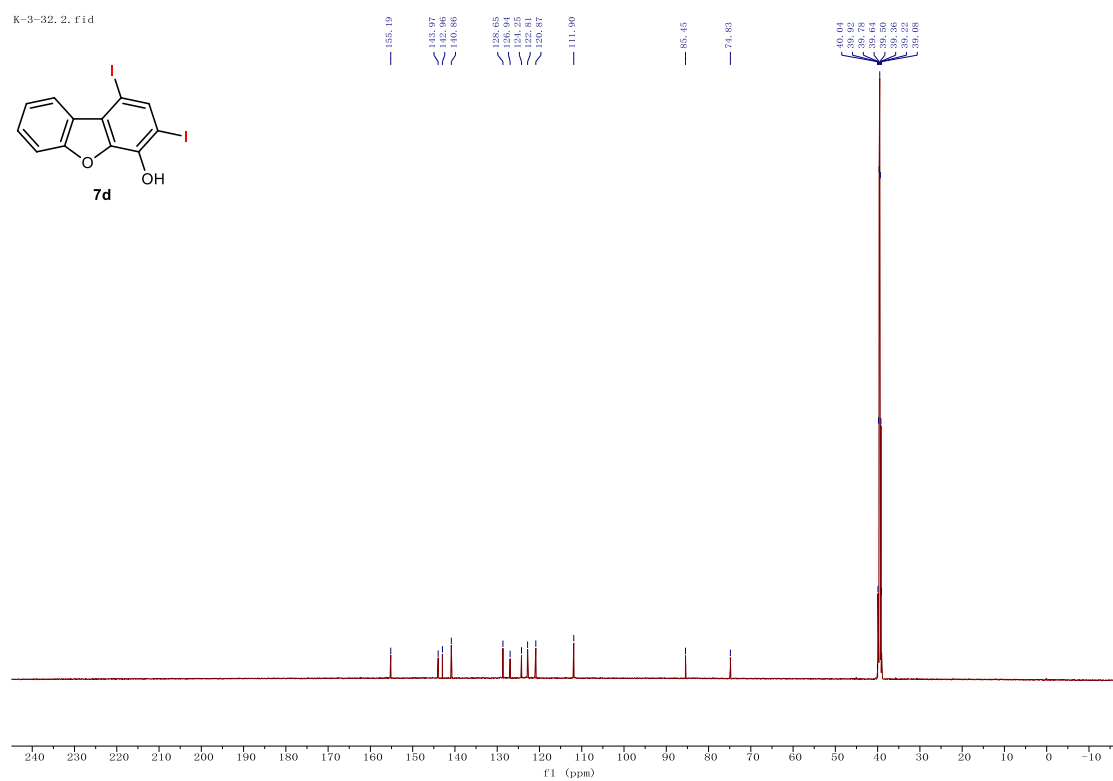

K-3-39(1). 1. fid

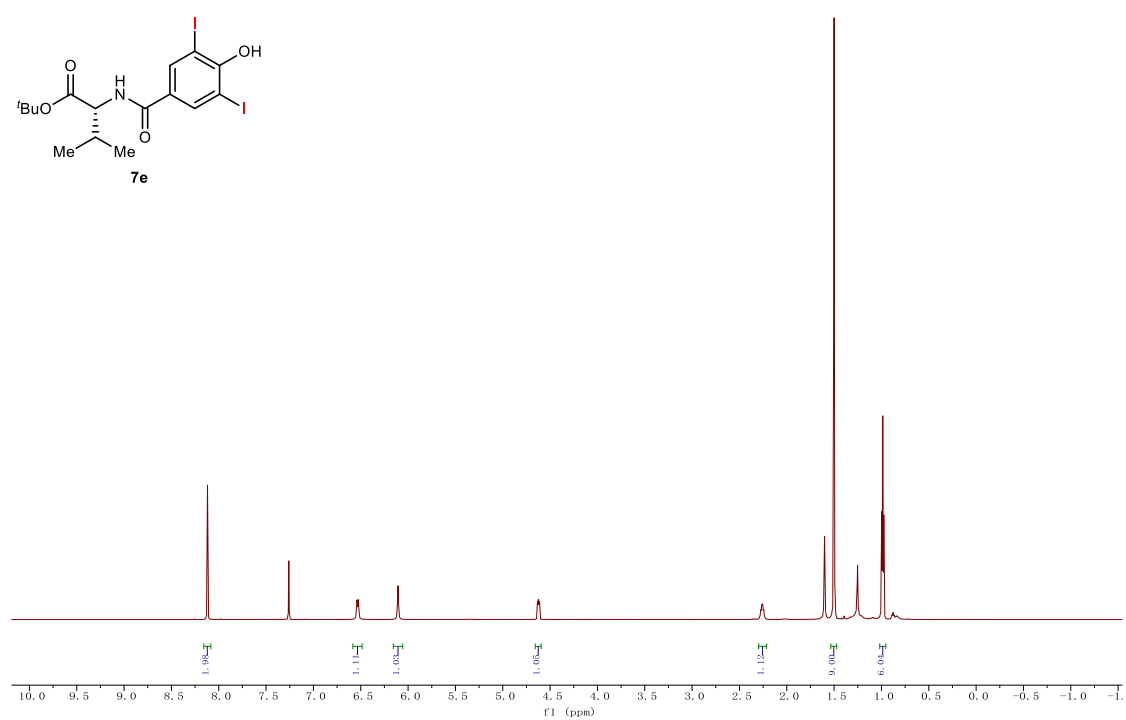

K-3-39(1). 2. fid

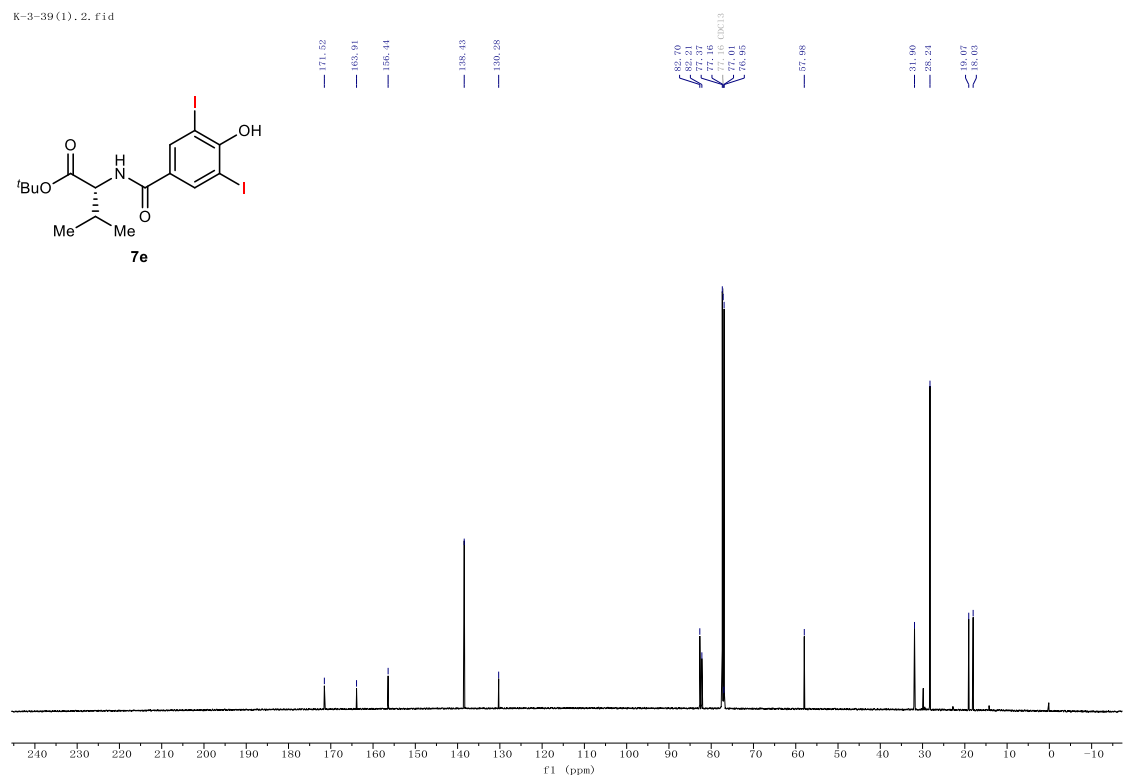

K-3-42.1.fid

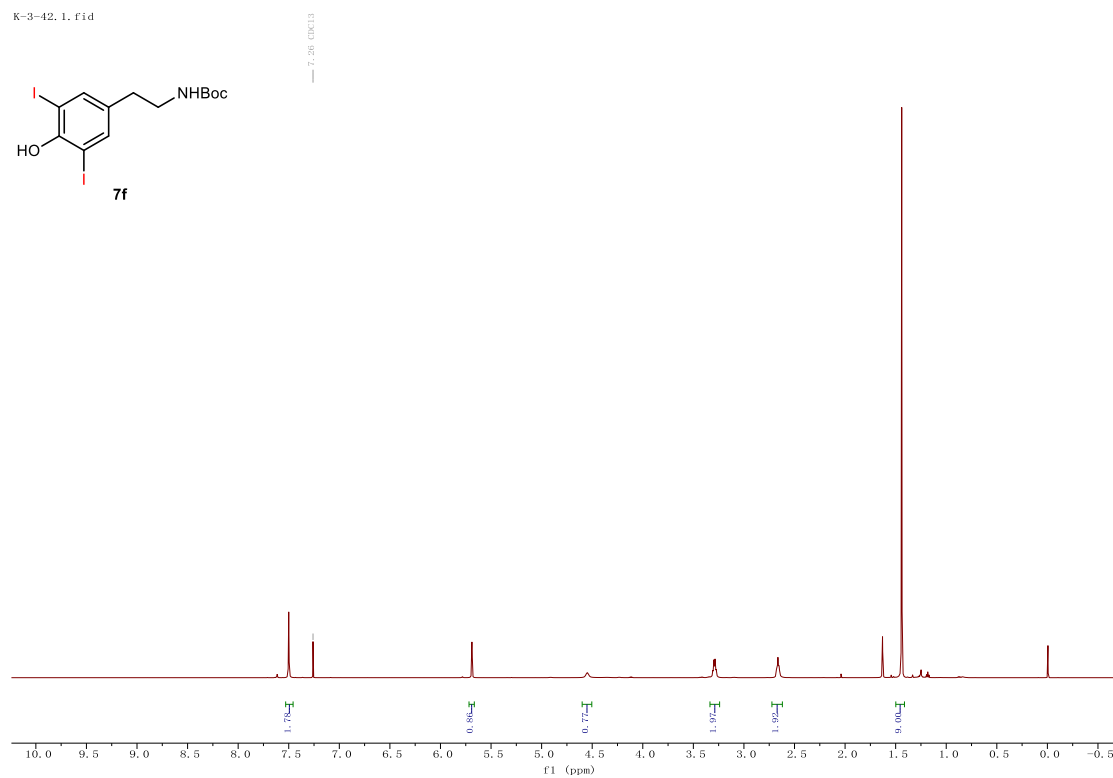

K-3-42.2.fid

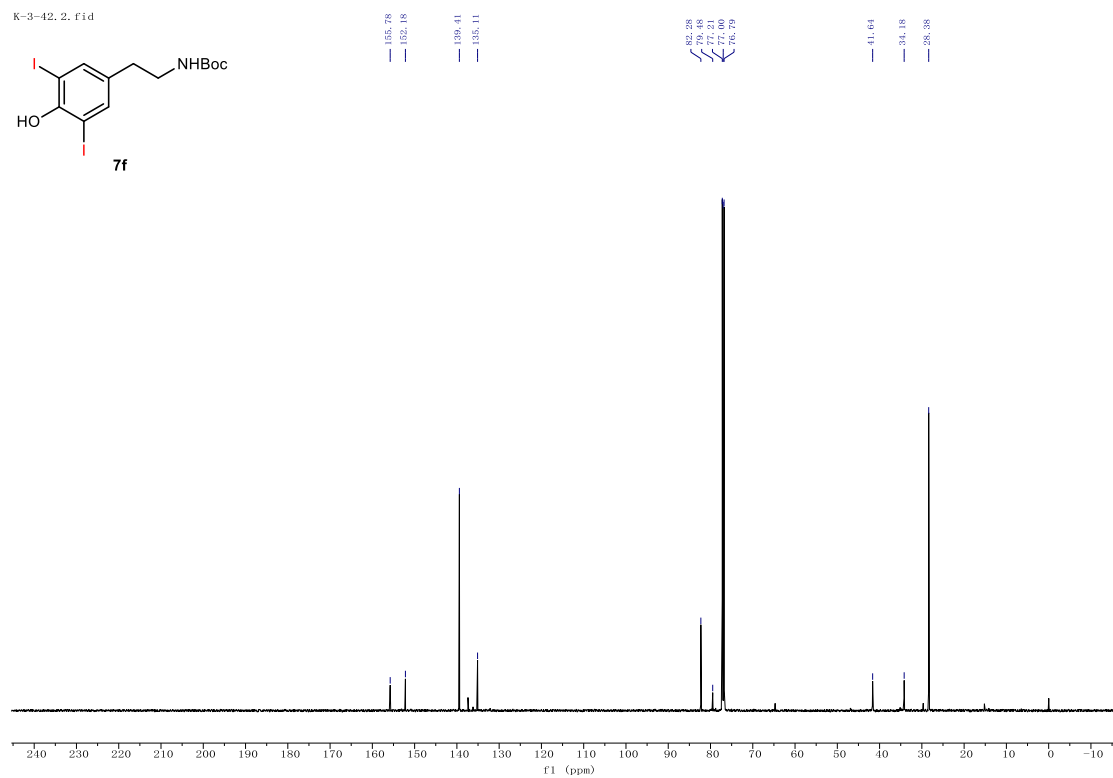

K-3-40, 1, f1d

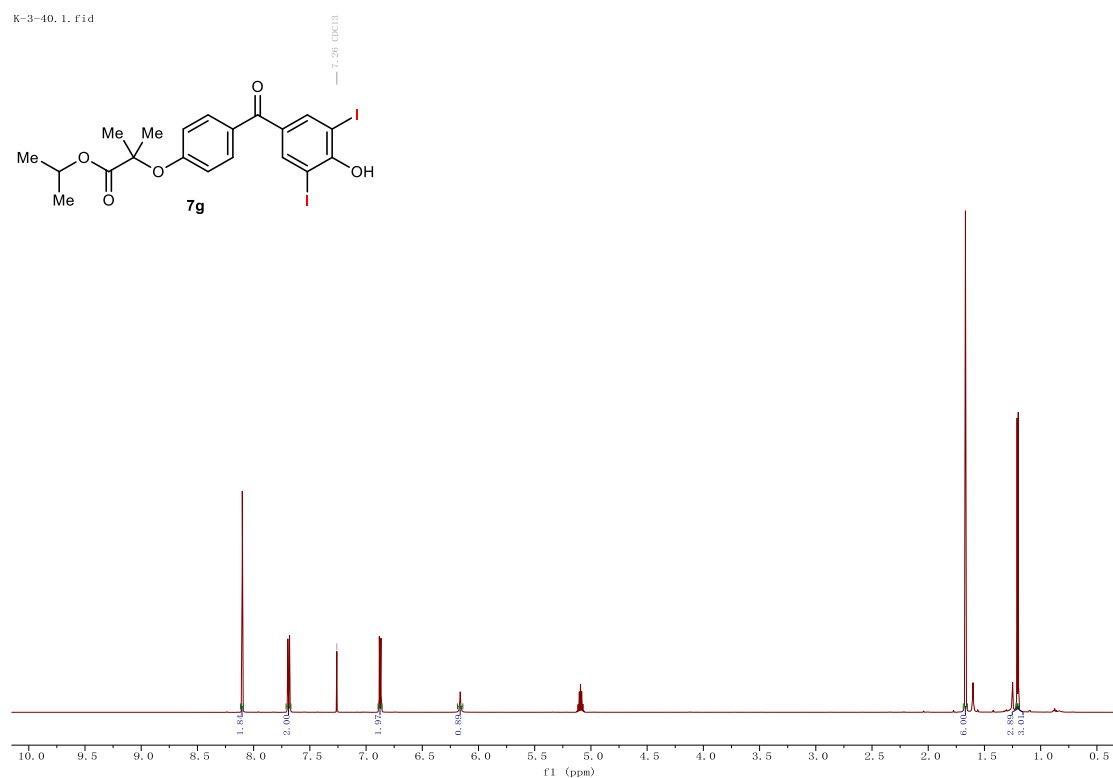

K-3-40, 2, f1d

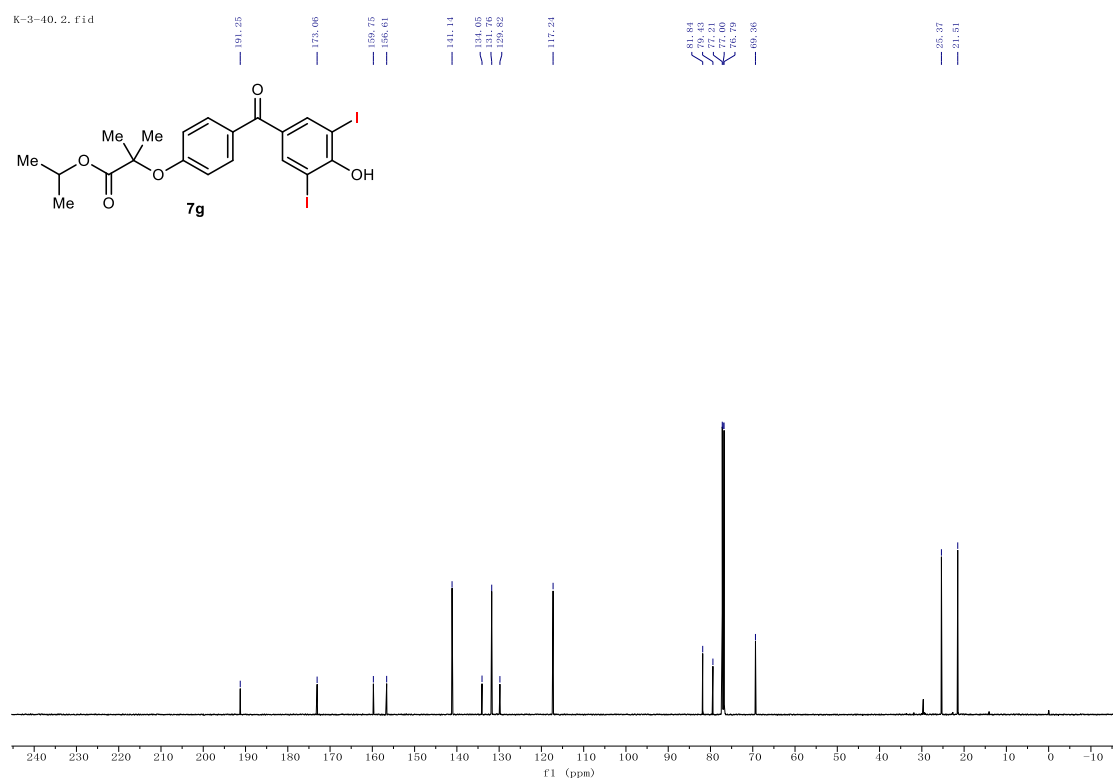

K-3-49, 2, f1d

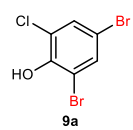

7.26 (d, 1H)

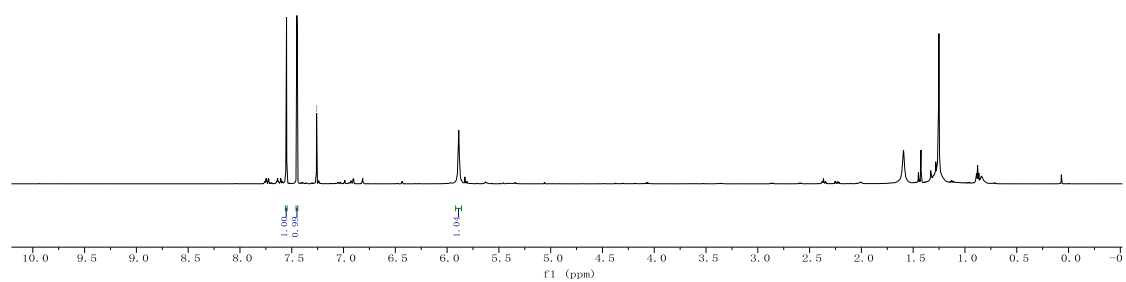

K-3-49, 3, f1d

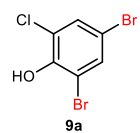

148.18

133.59

131.42

121.52

112.22

110.81

77.21

76.79

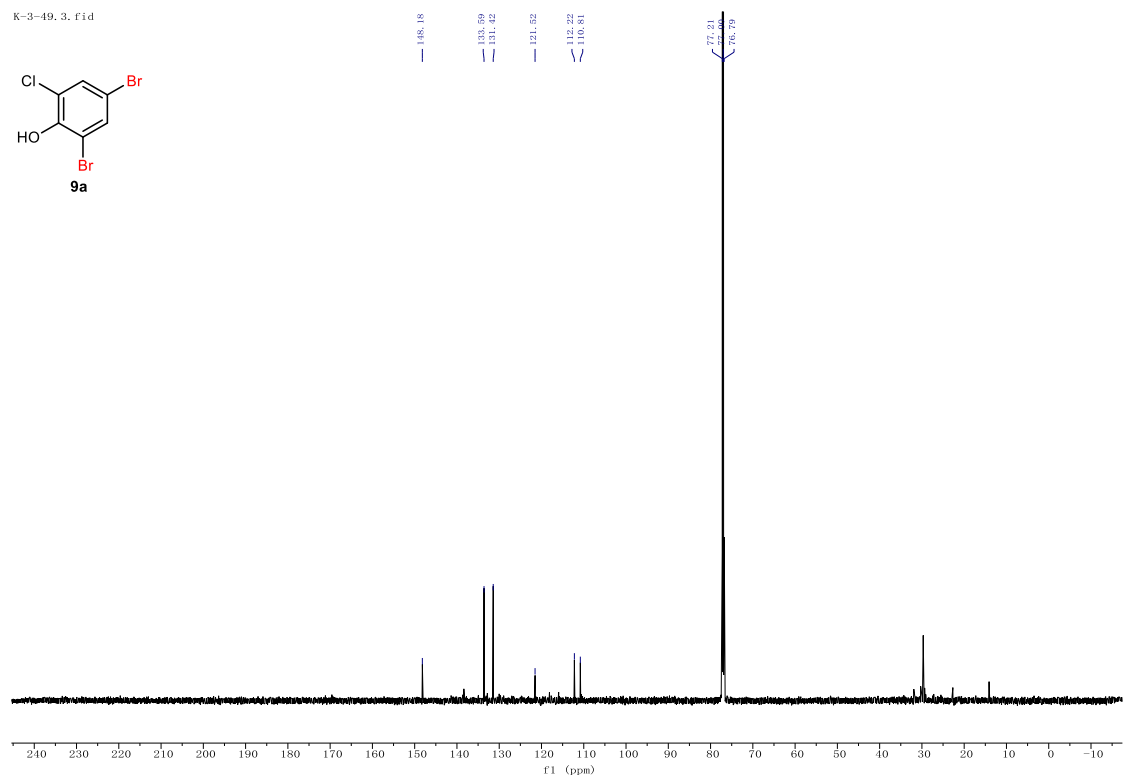

K-3-60. 1. fid

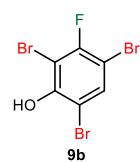

7.56 (d, 1H)

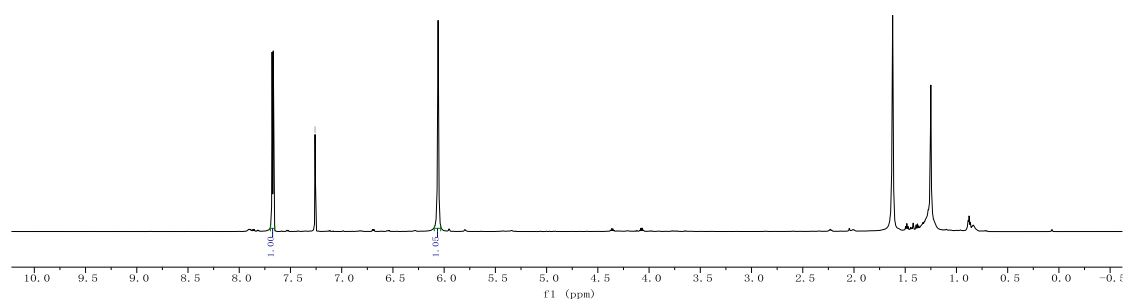

K-3-60. 2. fid

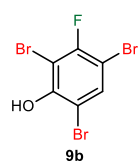156.53  
154.59  
150.25  
150.23  
133.87  
104.60  
104.57  
104.52  
100.67  
99.00  
96.93  
77.51  
77.00  
76.79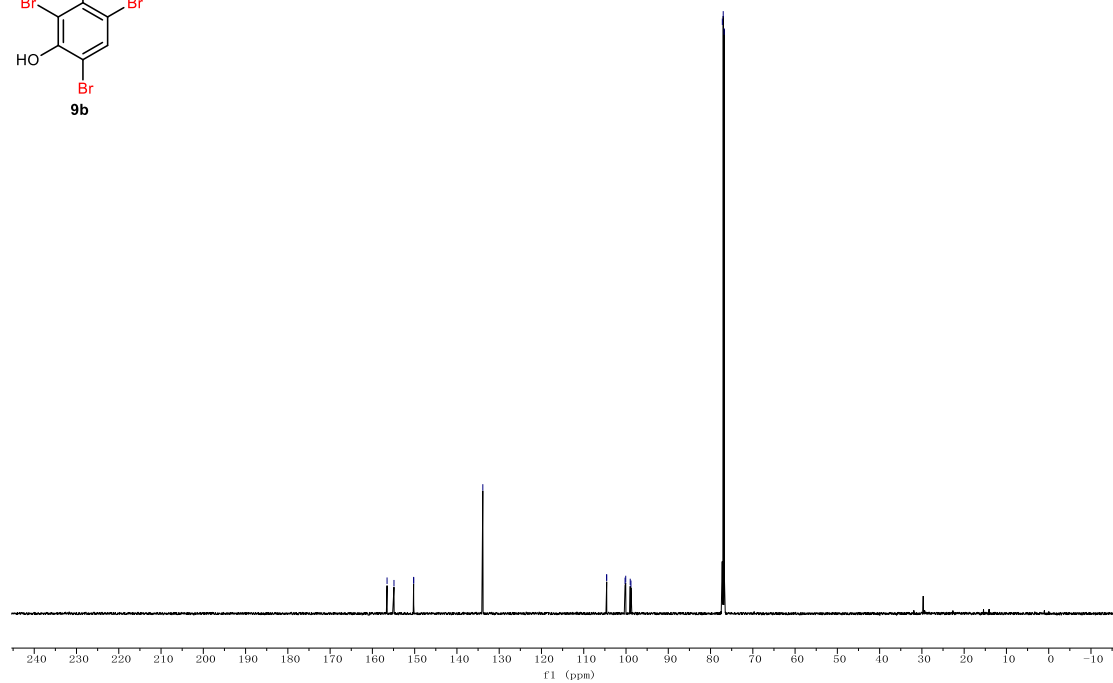



chenzhilong-20231024-KJ-1#\_10.fid

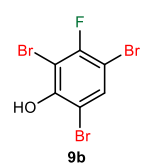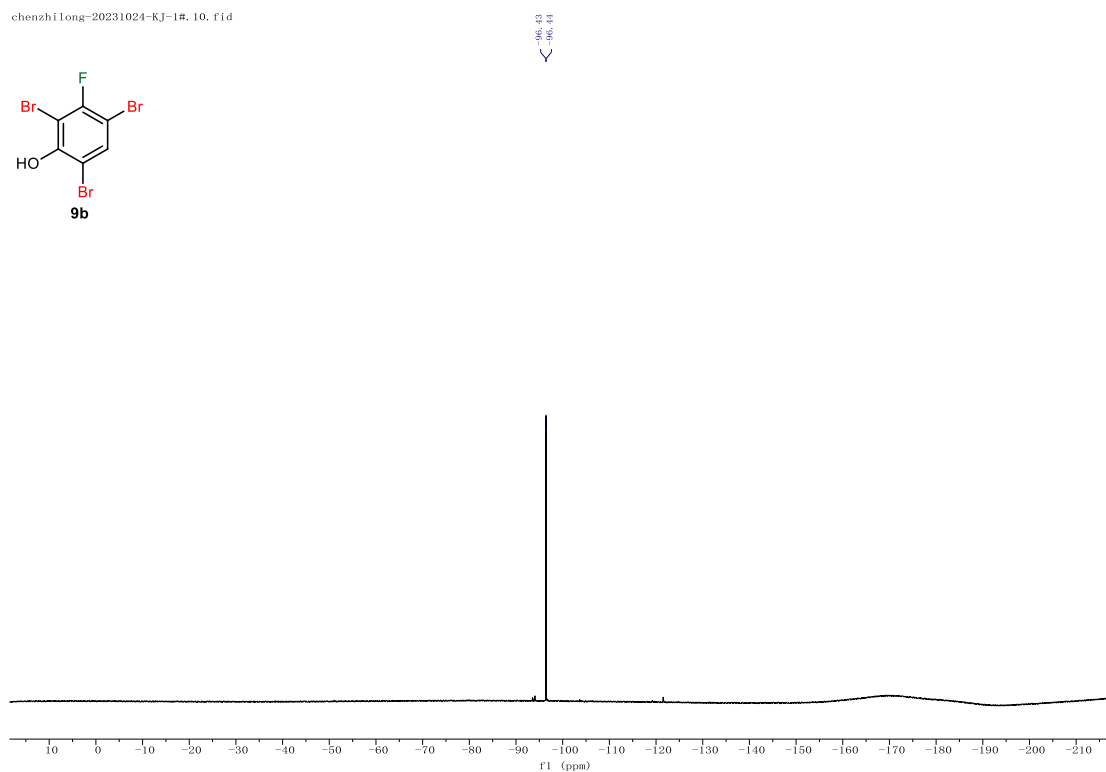

K-3-61\_1.fid

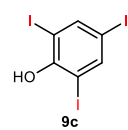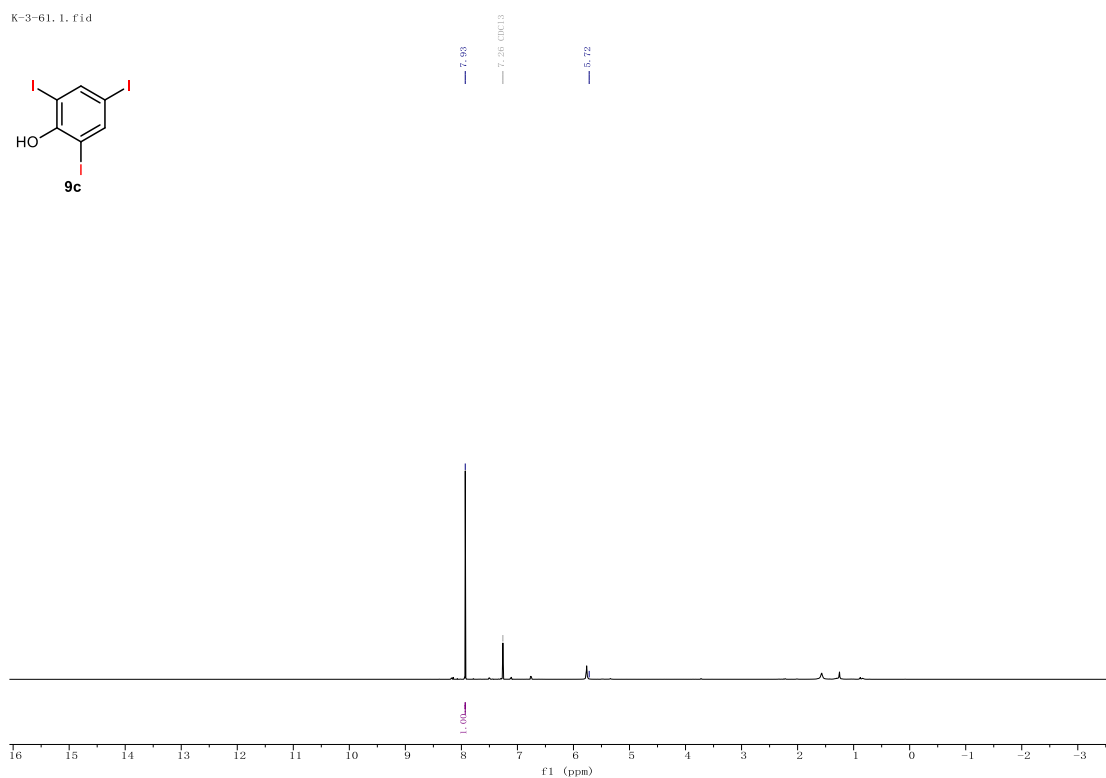

K-3-61. 2. fid

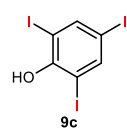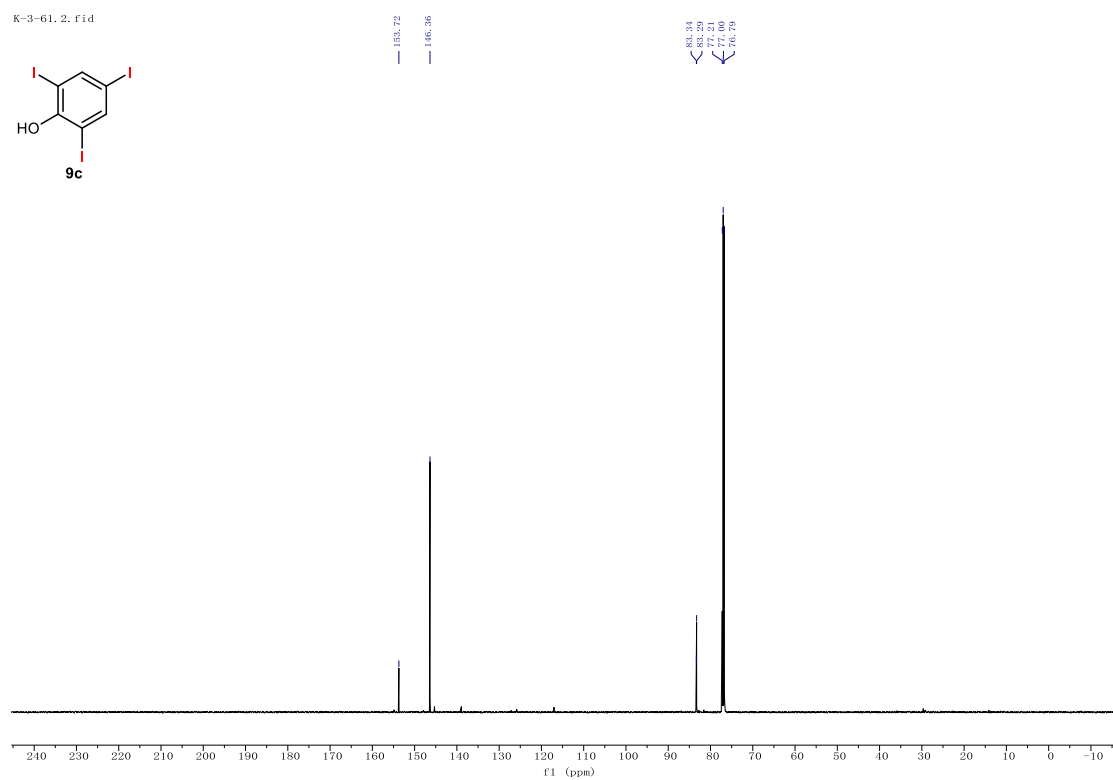

K-3-66repeat. 1. fid

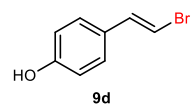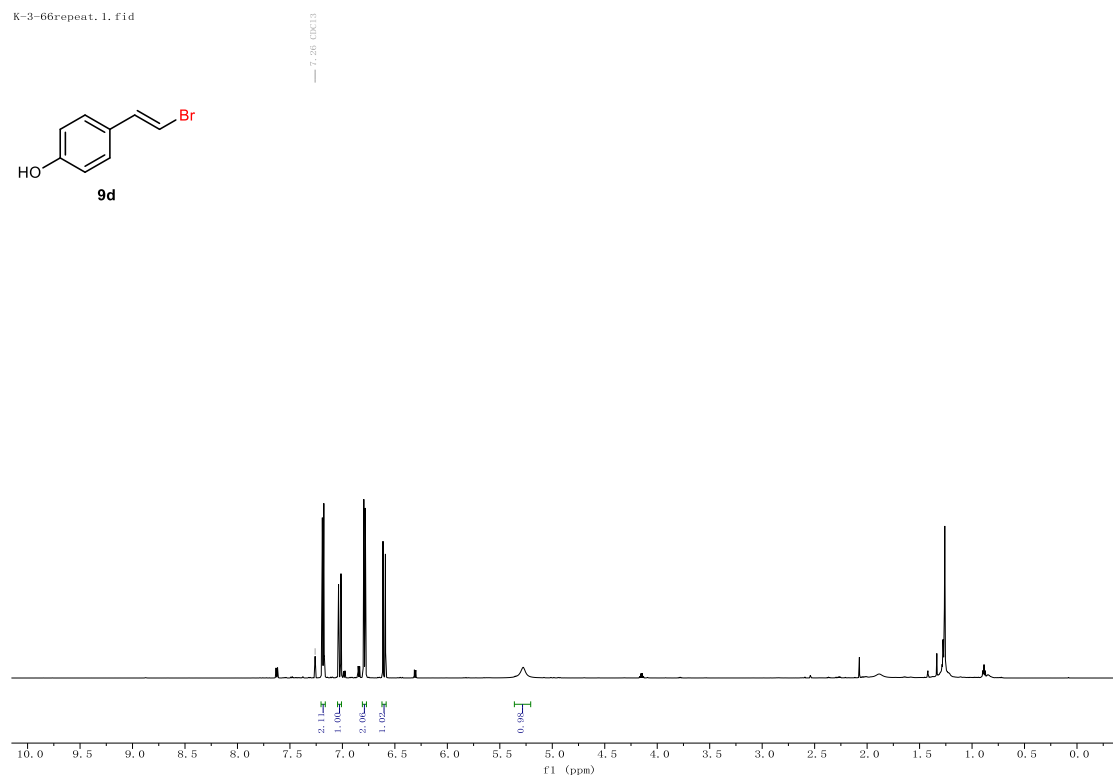

K-3-66repeat. 2.fid

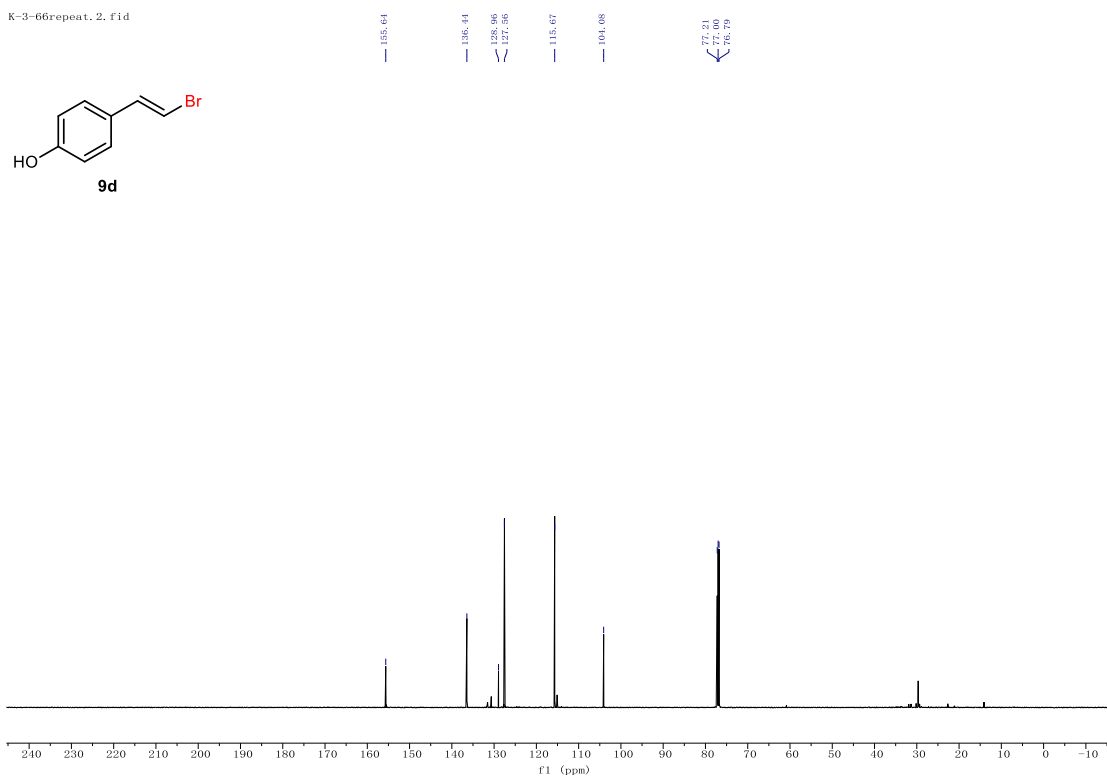

CZL-CN-Br. 1.fid

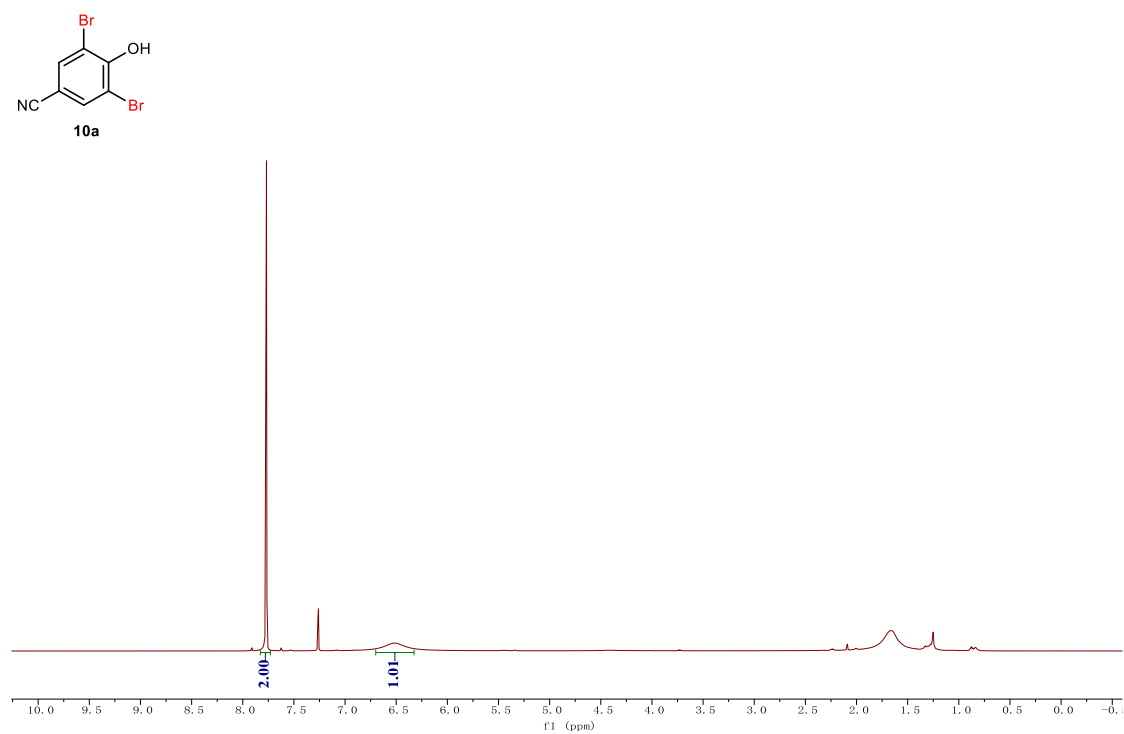

K-2-74. 2. f1d

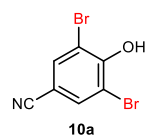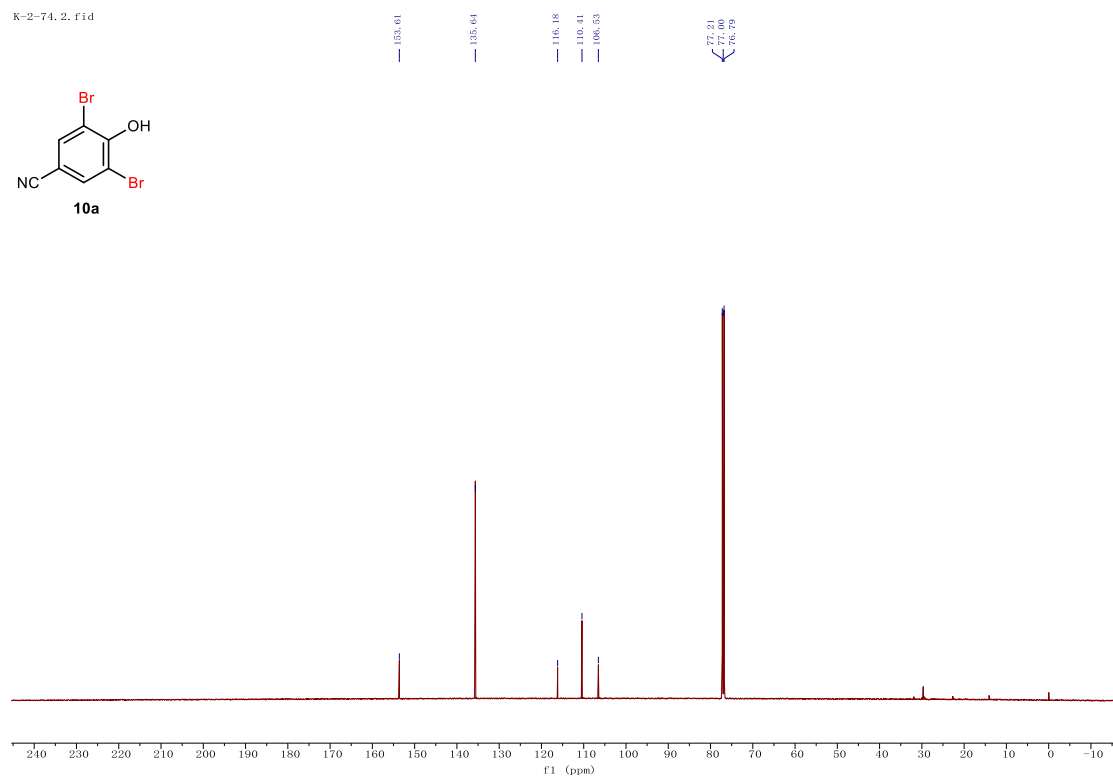

CZL-CN-1. 1. f1d

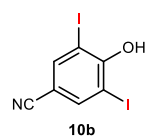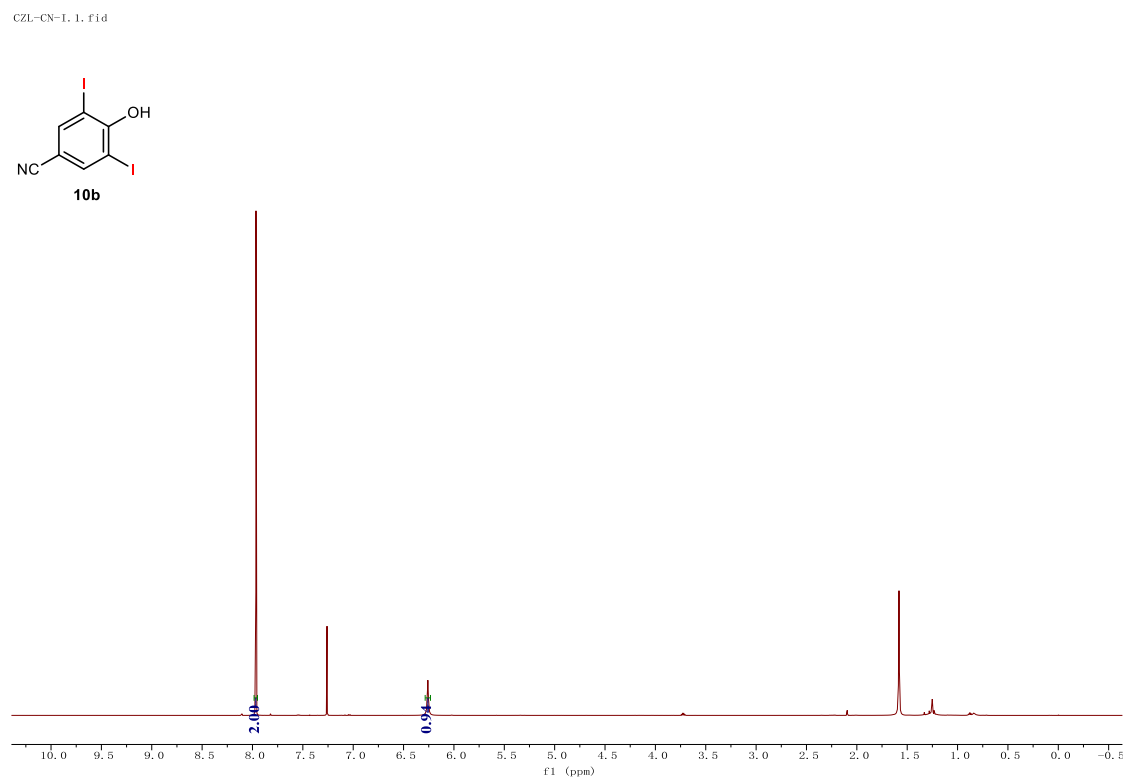

CZL-CN-1, 2, f1d

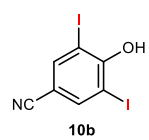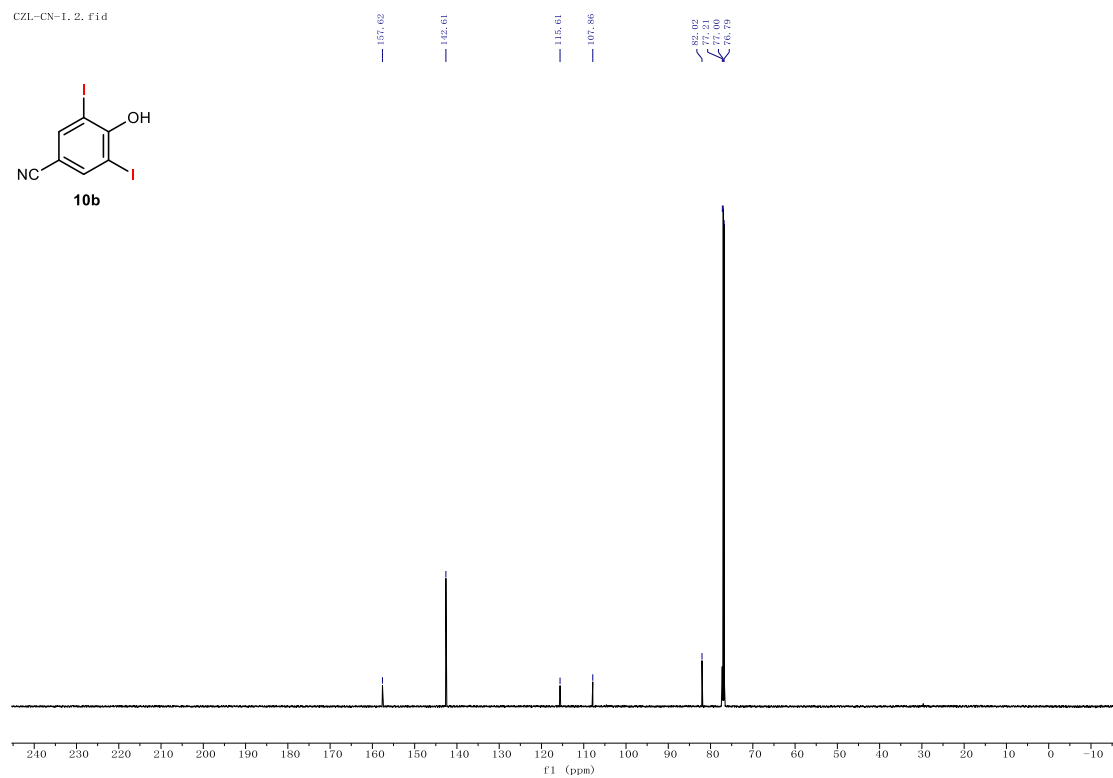

K-3-20, 1, f1d

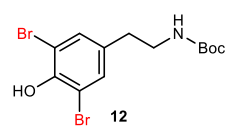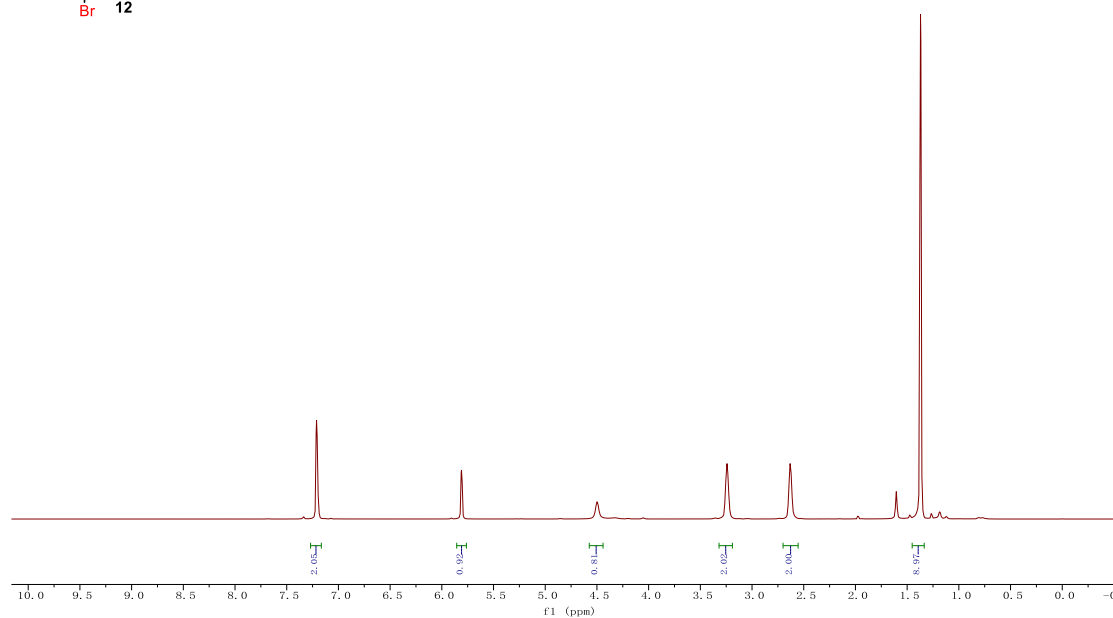

K-3-20, 2. fid

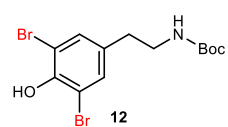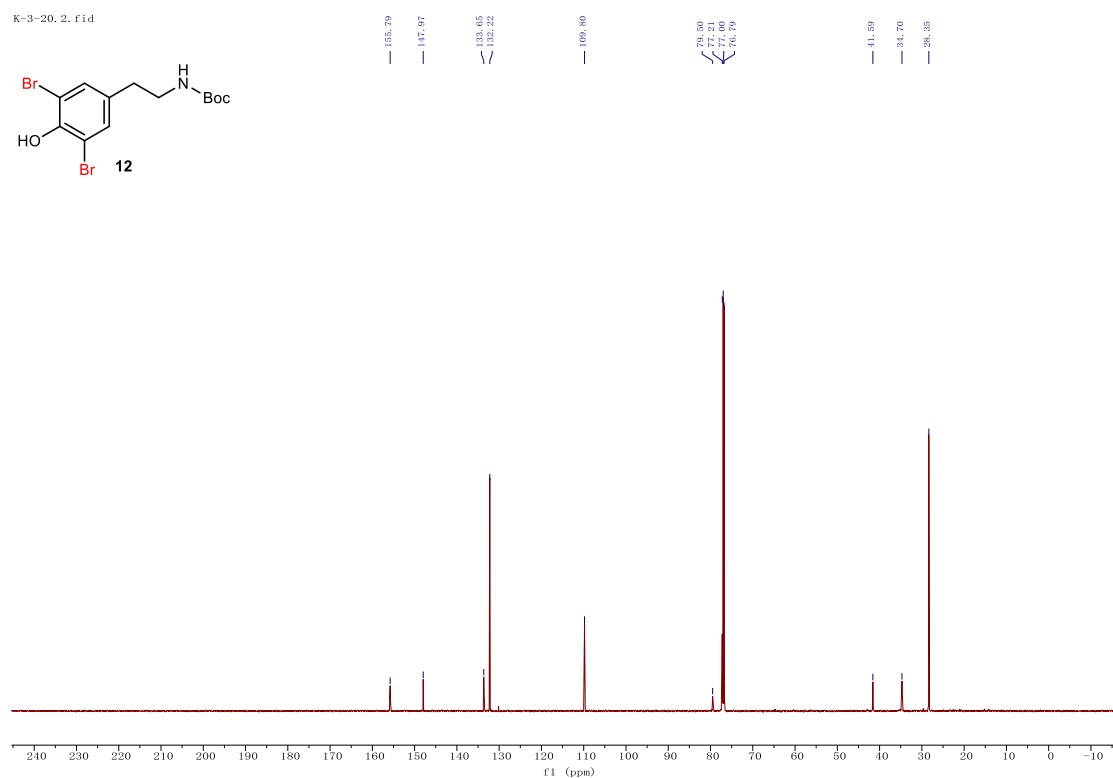

CZL-CHO, 1. fid

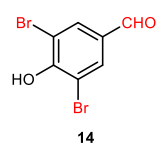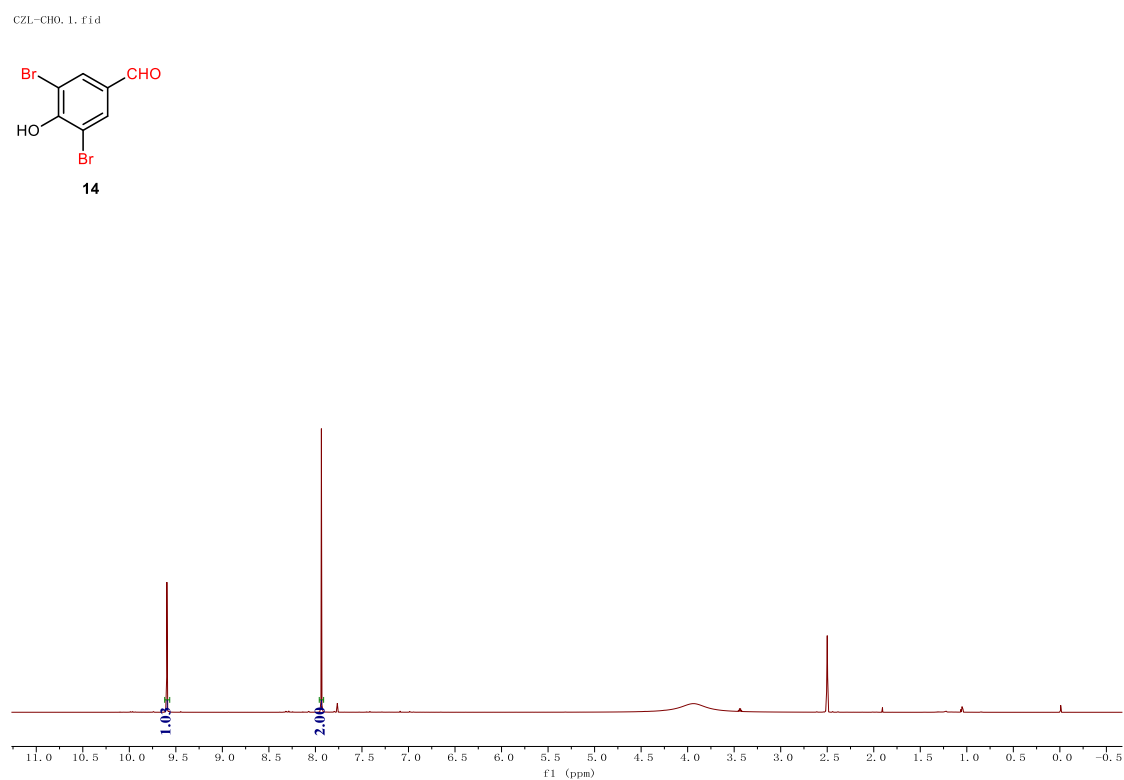

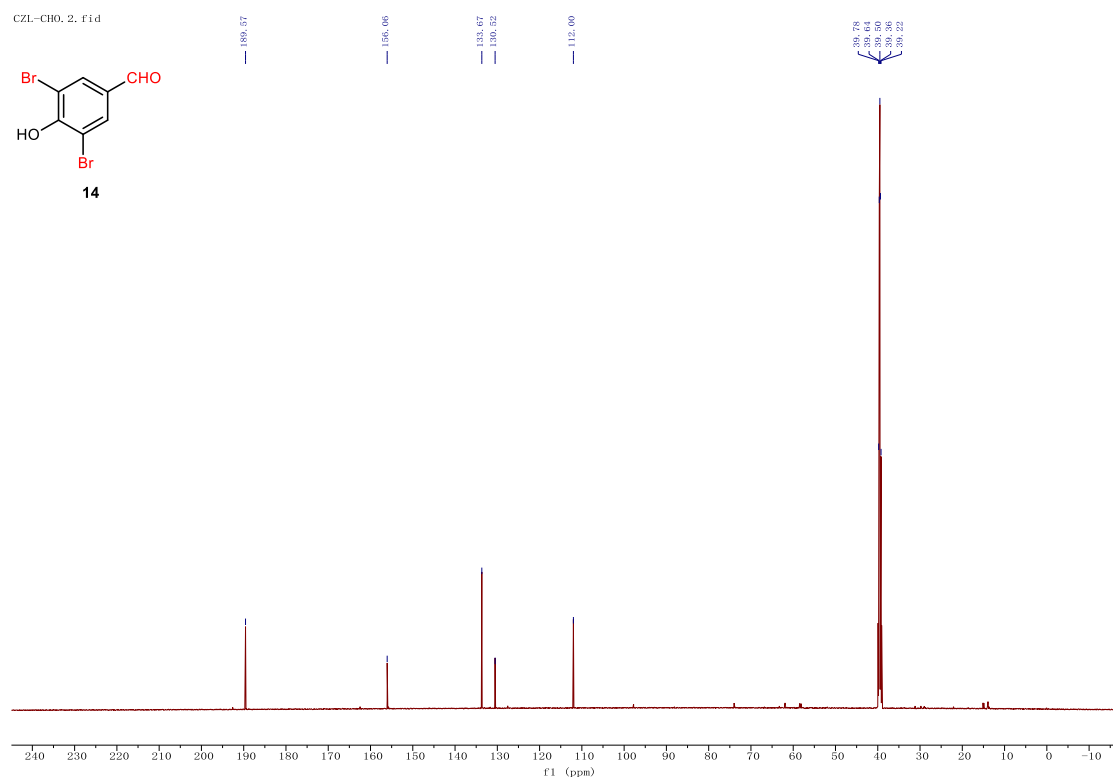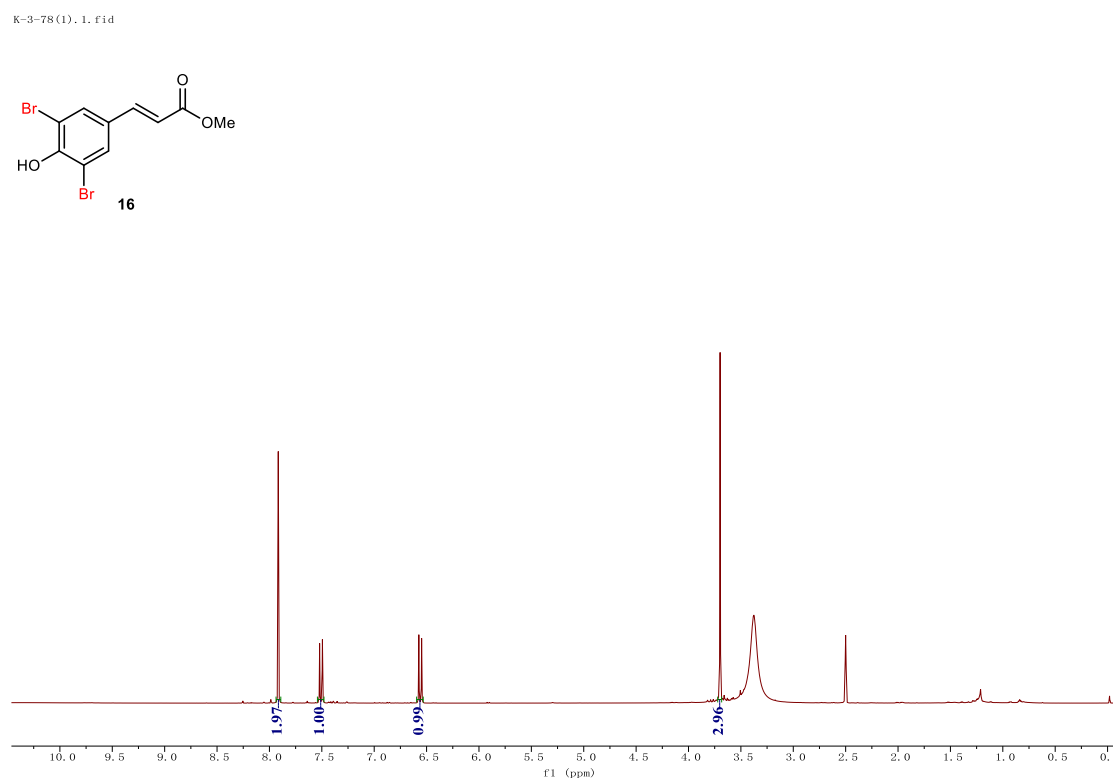

K-3-78. 2. fid

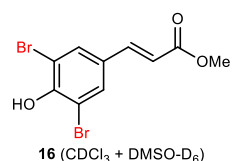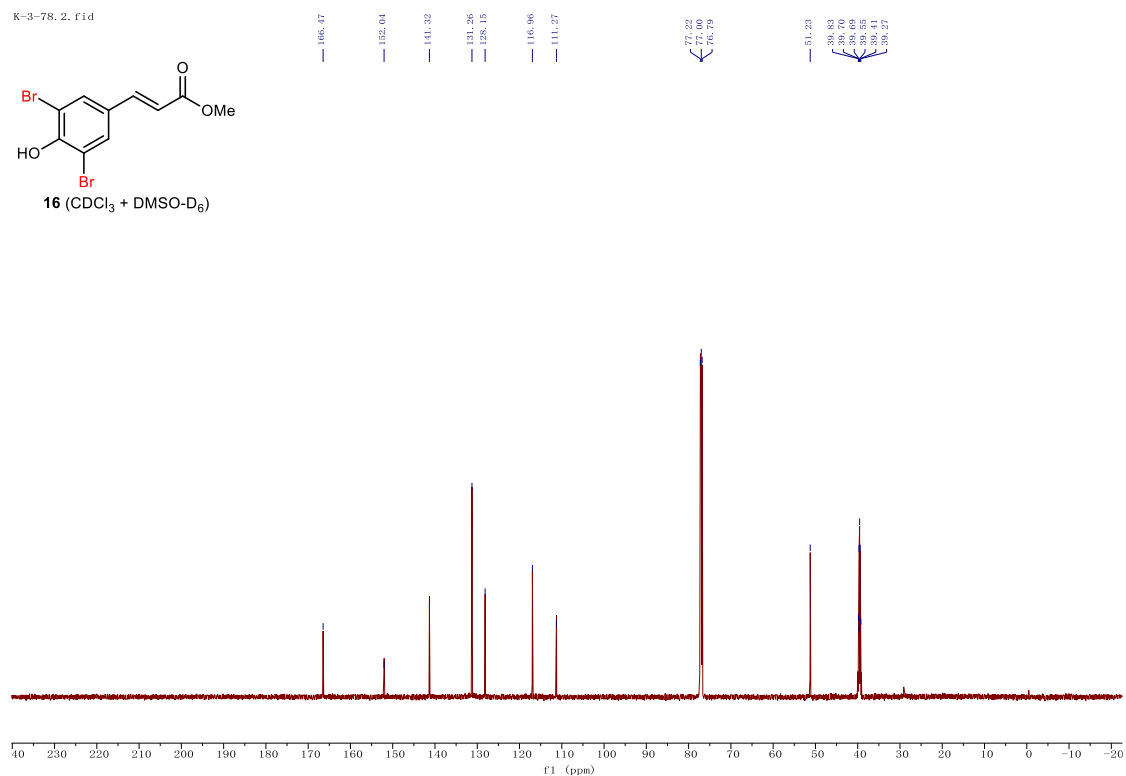

K-4-66re. 2. fid

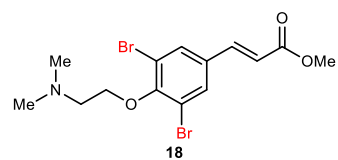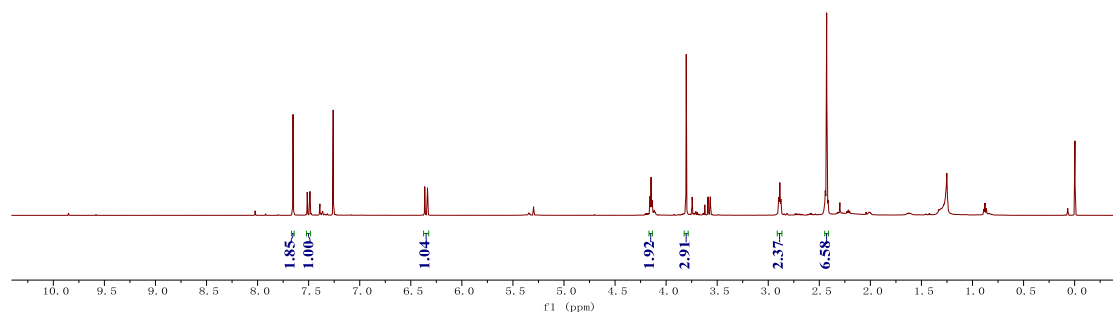



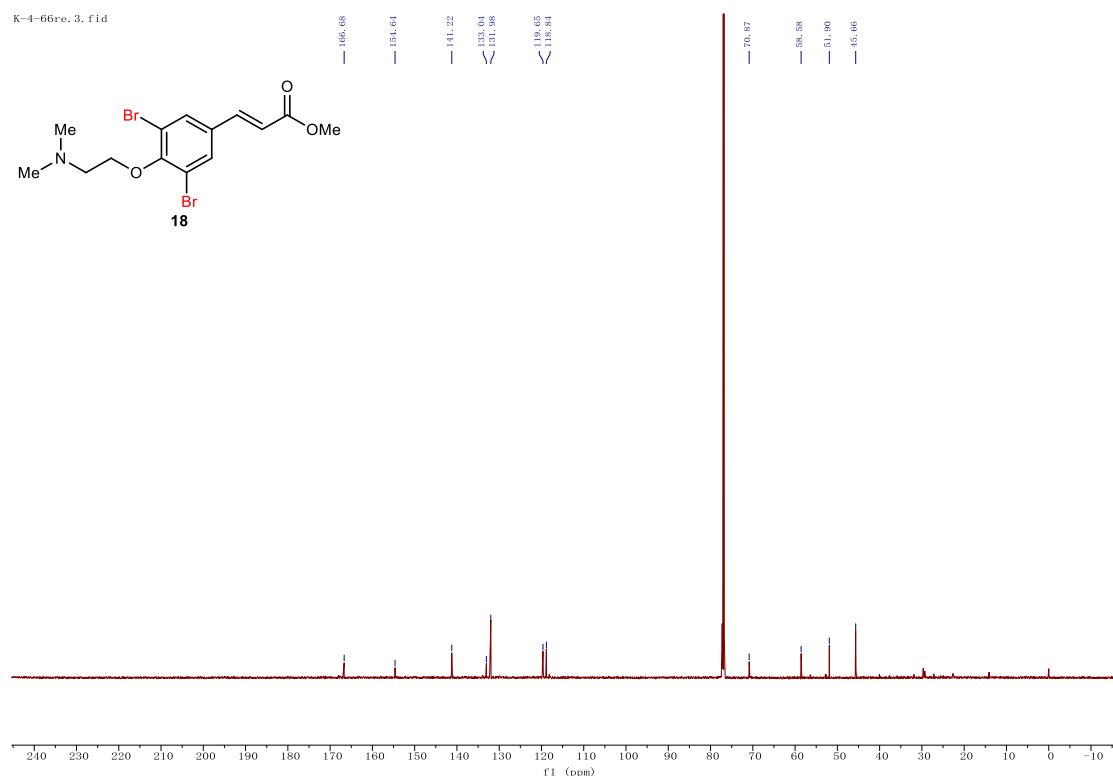

## X. Reference

- 1 G-E. Eduardo, P. Jairo, I. Beatriz and M. Luis, Synthesis of cyanoformamides from primary amines and carbon dioxide under mild conditions. synthesis of ceratinamine, *Org. Bio. Chem.*, 2009, **7**, 3991–3999.
- 2 G. N. Savvas and C. Jon, Preparation of a psammaphysene-based library, *Org. Lett.*, 2006, **8**, 4251–4254.
- 3 Z. Ma, H. Lu, K. Liao and Z. Chen, Tungstate-catalyzed biomimetic oxidative halogenation of (hetero)arene under mild condition, *iScience*, 2020, **23**, 101072.
- 4 I. de Toledo, T. A. Grigolo, J. M. Bennett, J. M. Elkins and R. A. Pilli, Modular synthesis of di- and trisubstituted imidazoles from ketones and aldehydes: a route to kinase inhibitors, *J. Org. Chem.*, 2019, **84**, 14187–14201.
- 5 Z. Wang, Y. Zhang, J. Guo, H. An, N. Gao, C. Zhang and J. Wang, Compounds as cyclin-dependent kinase 9 inhibitor and use therefore, WO 2021/115335 A1.
- 6 A. Jatsch, A. H. Parham, C. Pelumm, P. Stoessel, J. V. Kroesser, R. M. Anemian and T. Eberle, Carbazole derivatives for organic electroluminescence devices, WO 2013/041176A I.
- 7 W. Srimontree, L. Guo and M. Rueping, Hydride transfer enables the Nickel-catalyzed *ipso*-borylation and silylation of aldehydes, *Chem. Eur. J.*, 2020, **26**, 423–427.
- 8 M.R. Player, S. K. Meegalla, C. R. Illig, J. Chen, K. J. Wilson, Y-K. Lee, D. J. Parks, W. S. Cheung, H. Huang and R. J. A. Patch, Preparation of novel substituted imidazo[1,2-a]pyridazine derivatives as PDE10a inhibitors useful in treating type II diabetes, U.S. Pat. Appl. Publ., 20140364413.
- 9 J. Wu, Q. Zhao, T. C. Wilson, S. Verhoog, L. Lu, V. Gouverneur and Q. Shen, Synthesis and reactivity of  $\alpha$ -cumyl bromodifluoromethanesulfonate: application to the radiosynthesis of [<sup>18</sup>F]arylSCF<sub>3</sub>, *Angew. Chem. Int. Ed.*, 2019, **58**, 2413–2417.
- 10 L. Gong, H-B. Sun, L-F Deng, X. Zhang, J. Liu, S. Yang and D. Niu, Ni-Catalyzed Suzuki–Miyaura Cross-Coupling of  $\alpha$ -Oxo-vinylsulfones To Prepare C-Aryl Glycals and Acyclic Vinyl Ethers, *J. Am. Chem. Soc.*, 2019, **141**, 7680–7686.
- 11 S. Jin, H. T. Dang, G. C. Haug, R. He, V. D. Nguyen, V. T. Nguyen, H. D. Arman, K. S. Schanze and O. V. Larionov, Visible Light-Induced Borylation of C–O, C–N, and C–X Bonds, *J. Am. Chem. Soc.*,

2020, **142**, 1603–1613.

12 A. V. Bedekar, S. Ghosh, B. C. Ranu and P. K. Ghosh, Eco-friendly and versatile brominating reagent prepared from a liquid bromine precursor, S. Adimurthy, G. Ramachandraiah, *Green Chem.*, 2006, **8**, 916–922.

13 Z. Ma and Z. Chen, Tungstate-Catalyzed Bioinspired Decarboxylative Halogenation of Electron-Deficient (Hetero)Phenolic Acids, *ACS Sustainable Chem. Eng.*, 2022, **10**, 7453–7462.

14 A. O. Fitton, A. Rigby and R. J. Hurlock, Bromination of cumene and some 4-hydroxycumenes with N-bromosuccinimide, *J. Chem. Soc. C*, 1968, 1000–1001.

15 A. K. Mishra, H. Nagarajaiah and J. N. Moorthy, Trihaloisocyanuric acids as atom-economic reagents for halogenation of aromatics and carbonyl compounds in the solid state by ball milling, *Eur. J. Org. Chem.*, 2015, 2733–2738.

16 S. M. Johnson, S. Connelly, I. A. Wilson and J. W. Kelly, Toward optimization of the linker substructure common to transthyretin amyloidogenesis inhibitors using biochemical and structural studies, *J. Med. Chem.* 2008, **51**, 6348–6358.

17 Y. Xu, D. Hu, H. Zheng, D. Mei and Z. Gao, Regioselective bromination of arenes mediated by triphosgene-oxidized bromide, *Tetrahedron*, 2019, **39**, 130539.

18 S. Sörgel, N. Tokunaga, K. Sasaki, K. Okamoto and T. Hayashi, Rhodium/chiral diene-catalyzed asymmetric 1,4-addition of arylboronic acids to arylmethylene cyanoacetates, *Org. Lett.*, 2008, **10**, 589–592.

19 R.-J. Tang, T. Milcent and B. Crousse, Regioselective halogenation of arenes and heterocycles in hexafluoroisopropanol, *J. Org. Chem.*, 2018, **83**, 930–938.

20 Y. Satkar, L. F. Yera-Ledesma, N. Mali, D. Patil, P. Navarro-Santos, L. A. Segura-Quezada, P. I. Ramírez-Morales and C. R. Solorio-Alvarado, Iodine(III)-mediated, controlled di- or monoiodination of phenols, *J. Org. Chem.*, 2019, **84**, 4149–4164.

21 C. Wern, C. Ehrenreich, D. Joosten, T. vom Stein, H. Buchholz and B. König, Rapid access to bi- and tri-Functionalized dibenzofurans and their Application in selective Suzuki–Miyaura cross coupling reactions, *Eur. J. Org. Chem.*, 2018, **41**, 5644–5656.

22 W.-B. Pan, C.-C. Chen, L.-L. Wei, L.-M. Wei and M.-J. Wu, One-pot synthesis of 2,2'-bisbenzofurans using cuprous chloride as a catalyst, *Tetra. Lett.*, 2013, **54**, 2655–2657.

23 M. E. Hart, K. L. Suchland, M. Miyakawa, J. R. Bunzow, D. K. Grand and T. S. Scanlan, Trace amine-associated receptor agonists: synthesis and evaluation of thyronamines and related analogues, *J. Med. Chem.*, 2006, **49**, 1101–1112.

24 P. G. Dalai, K. Palit and N. Panda, Generation of dimethyl sulfoxide coordinated thermally stable halogen cation pools for C–H halogenation, *Adv. Syn. Catal.*, 2022, **364**, 1031–1038.

25 H. H. Hodgson and J. Nixon, Aromatic substitution III, action of fuming nitric acid on the 3-fluoro-2,4,6-trihalogenophenols and -anisoles, *J. Chem. Soc.*, 1930, 1870–1872.

26 S. Song, X. Sun, X. Li, Y. Yuan and N. Jiao, Efficient and practical oxidative bromination and iodination of arenes and heteroarenes with DMSO and hydrogen halide: a mild protocol for late-stage functionalization, *Org. Lett.*, 2015, **17**, 2886–2889.

27 C. Ye and J. M. Shreeve, Structure-dependent oxidative bromination of unsaturated C–C bonds mediated by selectfluor, *J. Org. Chem.*, 2004, **69**, 8561–8563.

28 D. Das, A. A. Bhosle, A. Chatterjee and B. Mainak, Automated grindstone chemistry: a simple and facile way for PEG-assisted stoichiometry-controlled halogenation of phenols and anilines using N-halosuccinimides, *Beilstein J. Org. Chem.*, 2022, **18**, 999–1008.

29 B. C. O. Rocha, G. P. Perecim and C. Raminelli, Biomimetic iodofunctionalization of aromatic and heteroaromatic compounds catalyzed by selenium tetrachloride, *Syn. Open.*, 2019, **03**, 142–147.

30 G. O. D. Estrada, A. L. F. de Souza, J. F. M. da Silva and O. A. C. Antunes, Revisiting *p*-coumarate esters production by Heck reaction, *Catal. Commun.*, 2008, **9**, 1734–1738.
